# Supplementary material for: Femtosecond real-time fragmentation dynamics of the nitrobenzene anion reveal the dissociative electron attachment mechanism
Source: Chem Sci. 2025 Jul 15;16(33):15029–36. doi: 10.1039/d5sc03656a (PMC12278501; doi:10.1039/d5sc03656a)
Supplement: SC-016-D5SC03656A-s001 [file SC-016-D5SC03656A-s001.xlsx]

## Sheet: Figure 1
Figure 1a					Figure 1b					Figure 1c
Photon energy (eV)	Depletion (a.u.)	Photoelectron (a.u.)	Photofragment (a.u.)		Electron binding energy (eV)	Intensity (5.17 eV, a.u.)	Electron binding energy (eV)	Intensity (2.07 eV, a.u.)		Electron binding energy (eV)	Intensity (2.07 eV, a.u.)	Electron binding energy (eV)	Intensity (2.48 eV, a.u.)	Electron binding energy (eV)	Intensity (3.00 eV, a.u.)	Electron binding energy (eV)	Intensity (3.86 eV, a.u.)	Electron binding energy (eV)	Intensity (4.59 eV, a.u.)	Electron binding energy (eV)	Intensity (5.17 eV, a.u.)
0.7501	0.01301	0.00192	0.00277		5.16599	0.05266	2.06638	0.39382		2.08333e-05	0.39382	2.08333e-05	0.31593	2.08333e-05	0.44307	2.08333e-05	0	2.08333e-05	0.1352	2.08333e-05	0.05266
0.7563	0.01562	0.00187	0.000828547		5.16593	0.06457	2.06632	0.41014		8.33333e-05	0.41014	8.33333e-05	0.44529	8.33333e-05	0.47069	8.33333e-05	0.00536	8.33333e-05	0.24071	8.33333e-05	0.06457
0.7625	0.00717	0.00184	-0.00303		5.16582	0.19412	2.06621	0.36853		0.0001875	0.36853	0.0001875	0.48038	0.0001875	0.51448	0.0001875	0.06865	0.0001875	0.06967	0.0001875	0.19412
0.7687	0.02341	0.00182	-0.00448		5.16568	0.25694	2.06607	0.5491		0.000333333	0.5491	0.000333333	0.73281	0.000333333	0.54979	0.000333333	0.15855	0.000333333	0	0.000333333	0.25694
0.7749	0.01463	0.00182	-0.00252		5.16549	0.20891	2.06588	0.70933		0.000520833	0.70933	0.000520833	0.87541	0.000520833	0.67698	0.000520833	0.13834	0.000520833	0.01807	0.000520833	0.20891
0.7811	0.00555	0.00182	-0.00457		5.16526	0.26183	2.06565	0.71899		0.00075	0.71899	0.00075	0.8412	0.00075	0.99561	0.00075	0.09392	0.00075	0.1064	0.00075	0.26183
0.7873	0.01626	0.0018	-0.00522		5.16499	0.43382	2.06538	0.67143		0.00102	0.67143	0.00102	0.85373	0.00102	1	0.00102	0.17234	0.00102	0.16184	0.00102	0.43382
0.7935	0.01097	0.00181	-0.00413		5.16468	0.63433	2.06507	0.7733		0.00133	0.7733	0.00133	0.94949	0.00133	0.77783	0.00133	0.2096	0.00133	0.23566	0.00133	0.63433
0.7997	0.00447	0.00179	-0.00343		5.16432	0.79976	2.06471	0.76738		0.00169	0.76738	0.00169	0.8609	0.00169	0.75137	0.00169	0.12751	0.00169	0.27645	0.00169	0.79976
0.8059	0.01873	0.00177	-0.00576		5.16393	0.84279	2.06432	0.63274		0.00208	0.63274	0.00208	0.70874	0.00208	0.8918	0.00208	0.03609	0.00208	0.30344	0.00208	0.84279
0.8121	0.01074	0.00177	-0.00808		5.16349	0.78217	2.06388	0.67767		0.00252	0.67767	0.00252	0.78485	0.00252	0.71359	0.00252	0.1198	0.00252	0.39312	0.00252	0.78217
0.8183	0.01417	0.00175	-0.0093		5.16301	0.7423	2.0634	0.88451		0.003	0.88451	0.003	1	0.003	0.53815	0.003	0.32338	0.003	0.55408	0.003	0.7423
0.82449	0.01079	0.00172	-0.01132		5.16249	0.77275	2.06288	0.93397		0.00352	0.93397	0.00352	0.97047	0.00352	0.59877	0.00352	0.30577	0.00352	0.60284	0.00352	0.77275
0.83069	0.01522	0.00181	-0.00359		5.16193	0.8238	2.06232	0.85694		0.00408	0.85694	0.00408	0.77181	0.00408	0.61061	0.00408	0.13193	0.00408	0.62418	0.00408	0.8238
0.83689	0.00723	0.00182	-0.00397		5.16132	0.76202	2.06171	0.78166		0.00469	0.78166	0.00469	0.77262	0.00469	0.68037	0.00469	0.14672	0.00469	0.5949	0.00469	0.76202
0.84309	0.02535	0.00182	-0.00432		5.16068	0.63996	2.06107	0.8285		0.00533	0.8285	0.00533	0.87713	0.00533	0.6678	0.00533	0.25942	0.00533	0.56958	0.00533	0.63996
0.84929	0.00111	0.00184	-0.00151		5.15999	0.72981	2.06038	0.9878		0.00602	0.9878	0.00602	0.91386	0.00602	0.50337	0.00602	0.2569	0.00602	0.64262	0.00602	0.72981
0.85549	0.01127	0.00182	-0.00217		5.15926	0.9426	2.05965	1		0.00675	1	0.00675	0.88911	0.00675	0.64907	0.00675	0.26531	0.00675	0.68825	0.00675	0.9426
0.86169	0.01658	0.00183	-0.00393		5.15849	0.91395	2.05888	0.92188		0.00752	0.92188	0.00752	0.78103	0.00752	0.70089	0.00752	0.38226	0.00752	0.69889	0.00752	0.91395
0.86789	0.01101	0.00189	-0.000410505		5.15768	0.77643	2.05807	0.92249		0.00833	0.92249	0.00833	0.71327	0.00833	0.44798	0.00833	0.42312	0.00833	0.67152	0.00833	0.77643
0.87409	0.01558	0.00188	0.000931753		5.15682	0.77122	2.05721	0.87504		0.00919	0.87504	0.00919	0.72974	0.00919	0.57871	0.00919	0.35175	0.00919	0.5982	0.00919	0.77122
0.88029	0.00923	0.00186	0.00269		5.15593	0.84186	2.05632	0.84523		0.01008	0.84523	0.01008	0.77014	0.01008	0.87347	0.01008	0.4135	0.01008	0.67382	0.01008	0.84186
0.88649	0.0177	0.0019	0.00399		5.15499	0.8348	2.05538	0.85116		0.01102	0.85116	0.01102	0.79593	0.01102	0.79864	0.01102	0.5385	0.01102	0.72844	0.01102	0.8348
0.89269	0.01178	0.0019	0.00383		5.15401	0.78127	2.0544	0.85267		0.012	0.85267	0.012	0.79791	0.012	0.66848	0.012	0.59558	0.012	0.66081	0.012	0.78127
0.89889	0.02909	0.00192	0.00499		5.15299	0.81649	2.05338	0.84219		0.01302	0.84219	0.01302	0.76599	0.01302	0.61393	0.01302	0.56056	0.01302	0.65064	0.01302	0.81649
0.90508	0.00549	0.00195	0.00518		5.15193	0.84329	2.05232	0.79575		0.01408	0.79575	0.01408	0.76556	0.01408	0.5571	0.01408	0.44311	0.01408	0.73472	0.01408	0.84329
0.91128	0.03112	0.00192	0.00611		5.15082	0.72248	2.05121	0.77931		0.01519	0.77931	0.01519	0.80728	0.01519	0.61663	0.01519	0.45204	0.01519	0.78336	0.01519	0.72248
0.91748	0.01527	0.00193	0.00505		5.14968	0.70845	2.05007	0.85721		0.01633	0.85721	0.01633	0.86436	0.01633	0.79742	0.01633	0.67164	0.01633	0.83468	0.01633	0.70845
0.92368	0.00434	0.00199	0.00797		5.14849	0.77952	2.04888	0.84087		0.01752	0.84087	0.01752	0.92518	0.01752	0.76433	0.01752	0.76628	0.01752	0.7904	0.01752	0.77952
0.92988	0.0157	0.00198	0.00518		5.14726	0.75886	2.04765	0.72599		0.01875	0.72599	0.01875	0.96429	0.01875	0.54526	0.01875	0.70377	0.01875	0.74444	0.01875	0.75886
0.93608	0.01534	0.00198	0.00706		5.14599	0.78922	2.04638	0.69888		0.02002	0.69888	0.02002	0.94444	0.02002	0.56365	0.02002	0.59452	0.02002	0.85877	0.02002	0.78922
0.94228	0.01562	0.00197	0.00642		5.14468	0.92097	2.04507	0.8134		0.02133	0.8134	0.02133	0.94217	0.02133	0.69403	0.02133	0.5734	0.02133	0.91428	0.02133	0.92097
0.94848	0.02965	0.00198	0.00882		5.14332	1	2.04371	0.86949		0.02269	0.86949	0.02269	0.88412	0.02269	0.67903	0.02269	0.73077	0.02269	0.88389	0.02269	1
0.95468	0.02118	0.00203	0.00727		5.14193	0.95177	2.04232	0.78418		0.02408	0.78418	0.02408	0.75141	0.02408	0.68948	0.02408	0.86722	0.02408	0.94772	0.02408	0.95177
0.96088	0.0151	0.00204	0.0027		5.14049	0.84335	2.04088	0.71275		0.02552	0.71275	0.02552	0.68925	0.02552	0.65175	0.02552	0.79314	0.02552	1	0.02552	0.84335
0.96708	0.01582	0.00212	0.00233		5.13901	0.86626	2.0394	0.76944		0.027	0.76944	0.027	0.79875	0.027	0.59883	0.027	0.68528	0.027	0.94605	0.027	0.86626
0.97328	0.00927	0.00211	0.00102		5.13749	0.91649	2.03788	0.77833		0.02852	0.77833	0.02852	0.85218	0.02852	0.63119	0.02852	0.70187	0.02852	0.92577	0.02852	0.91649
0.97948	0.00415	0.00217	0.00238		5.13593	0.82864	2.03632	0.71559		0.03008	0.71559	0.03008	0.72088	0.03008	0.5888	0.03008	0.76406	0.03008	0.95	0.03008	0.82864
0.98567	2.08167e-17	0.00222	0.00229		5.13432	0.73471	2.03471	0.76154		0.03169	0.76154	0.03169	0.64308	0.03169	0.47178	0.03169	0.80256	0.03169	0.88018	0.03169	0.73471
0.99187	0.01769	0.00231	0.00393		5.13268	0.75649	2.03307	0.77924		0.03333	0.77924	0.03333	0.71762	0.03333	0.48619	0.03333	0.79051	0.03333	0.8101	0.03333	0.75649
0.99807	0.02559	0.0023	0.000156548		5.13099	0.80444	2.03138	0.66719		0.03502	0.66719	0.03502	0.72337	0.03502	0.62653	0.03502	0.79238	0.03502	0.83202	0.03502	0.80444
1.00427	0.01844	0.00237	-0.00187		5.12926	0.80373	2.02965	0.63694		0.03675	0.63694	0.03675	0.6158	0.03675	0.64966	0.03675	0.84676	0.03675	0.90218	0.03675	0.80373
1.01047	0.02721	0.00243	-0.00322		5.12749	0.75556	2.02788	0.61203		0.03852	0.61203	0.03852	0.59733	0.03852	0.47301	0.03852	0.84934	0.03852	0.98317	0.03852	0.75556
1.01667	0.0152	0.00253	-0.0044		5.12568	0.73846	2.02607	0.56122		0.04033	0.56122	0.04033	0.65802	0.04033	0.38007	0.04033	0.84261	0.04033	0.98035	0.04033	0.73846
1.02287	0.01281	0.00266	-0.00108		5.12382	0.79504	2.02421	0.58788		0.04219	0.58788	0.04219	0.60735	0.04219	0.50465	0.04219	0.85769	0.04219	0.92813	0.04219	0.79504
1.02907	0.02181	0.00274	-0.000620975		5.12193	0.80488	2.02232	0.61038		0.04408	0.61038	0.04408	0.54487	0.04408	0.58586	0.04408	0.84994	0.04408	0.92251	0.04408	0.80488
1.03527	0.02088	0.00278	-0.00425		5.11999	0.73444	2.02038	0.60276		0.04602	0.60276	0.04602	0.60637	0.04602	0.54834	0.04602	0.84193	0.04602	0.88559	0.04602	0.73444
1.04147	0.02288	0.0028	-0.00347		5.11801	0.70727	2.0184	0.63905		0.048	0.63905	0.048	0.7128	0.048	0.60079	0.048	0.92124	0.048	0.85844	0.048	0.70727
1.04767	0.01645	0.00305	-0.00107		5.11599	0.74269	2.01638	0.71235		0.05002	0.71235	0.05002	0.77452	0.05002	0.75033	0.05002	0.94624	0.05002	0.92077	0.05002	0.74269
1.05387	0.01187	0.00318	-0.00475		5.11393	0.71639	2.01432	0.75673		0.05208	0.75673	0.05208	0.82511	0.05208	0.80449	0.05208	0.9511	0.05208	0.93681	0.05208	0.71639
1.06006	0.01198	0.00326	-0.00321		5.11182	0.65908	2.01221	0.83639		0.05419	0.83639	0.05419	0.86355	0.05419	0.70088	0.05419	1	0.05419	0.8454	0.05419	0.65908
1.06626	0.0101	0.00354	0.00135		5.10968	0.71208	2.01007	0.92405		0.05633	0.92405	0.05633	0.89281	0.05633	0.665	0.05633	0.98181	0.05633	0.81391	0.05633	0.71208
1.07246	0.0295	0.0034	-0.00018322		5.10749	0.79621	2.00788	0.8406		0.05852	0.8406	0.05852	0.87155	0.05852	0.65657	0.05852	0.95013	0.05852	0.87453	0.05852	0.79621
1.07866	0.02086	0.00369	-0.0039		5.10526	0.80978	2.00565	0.71422		0.06075	0.71422	0.06075	0.81996	0.06075	0.59704	0.06075	0.93882	0.06075	0.90996	0.06075	0.80978
1.08486	0.0165	0.00385	-0.00197		5.10299	0.69883	2.00338	0.66032		0.06302	0.66032	0.06302	0.77216	0.06302	0.50641	0.06302	0.86983	0.06302	0.87597	0.06302	0.69883
1.09106	0.01951	0.00375	-0.00335		5.10068	0.59552	2.00107	0.63299		0.06533	0.63299	0.06533	0.7253	0.06533	0.3831	0.06533	0.82603	0.06533	0.88583	0.06533	0.59552
1.09726	0.00671	0.00415	-0.00404		5.09832	0.61006	1.99871	0.64563		0.06769	0.64563	0.06769	0.64963	0.06769	0.32774	0.06769	0.8806	0.06769	0.8917	0.06769	0.61006
1.10346	0.01961	0.00429	-0.00414		5.09593	0.70546	1.99632	0.63007		0.07008	0.63007	0.07008	0.57118	0.07008	0.39549	0.07008	0.95878	0.07008	0.85766	0.07008	0.70546
1.10966	0.01162	0.00461	-0.00383		5.09349	0.74891	1.99388	0.51693		0.07252	0.51693	0.07252	0.52862	0.07252	0.42182	0.07252	0.93573	0.07252	0.85898	0.07252	0.74891
1.11586	0.01851	0.00468	-0.00583		5.09101	0.68618	1.9914	0.39912		0.075	0.39912	0.075	0.46811	0.075	0.42153	0.075	0.88119	0.075	0.86888	0.075	0.68618
1.12206	0.02204	0.005	-0.00386		5.08849	0.59652	1.98888	0.39831		0.07752	0.39831	0.07752	0.37961	0.07752	0.40076	0.07752	0.83864	0.07752	0.82477	0.07752	0.59652
1.12826	0.00343	0.00544	-0.00581		5.08593	0.55346	1.98632	0.43674		0.08008	0.43674	0.08008	0.391	0.08008	0.32481	0.08008	0.77978	0.08008	0.81803	0.08008	0.55346
1.13446	0.01064	0.006	-0.00351		5.08332	0.56409	1.98371	0.36414		0.08269	0.36414	0.08269	0.42082	0.08269	0.30422	0.08269	0.73911	0.08269	0.83683	0.08269	0.56409
1.14065	0.02005	0.00617	-0.002		5.08068	0.55539	1.98107	0.27572		0.08533	0.27572	0.08533	0.38382	0.08533	0.2964	0.08533	0.7311	0.08533	0.76458	0.08533	0.55539
1.14685	0.01533	0.00612	-0.00449		5.07799	0.51267	1.97838	0.2722		0.08802	0.2722	0.08802	0.33238	0.08802	0.26968	0.08802	0.73763	0.08802	0.69093	0.08802	0.51267
1.15305	0.0186	0.00663	-0.000215109		5.07526	0.51353	1.97565	0.29122		0.09075	0.29122	0.09075	0.30732	0.09075	0.27765	0.09075	0.79356	0.09075	0.71942	0.09075	0.51353
1.15925	0.02053	0.00672	0.00321		5.07249	0.51355	1.97288	0.27534		0.09352	0.27534	0.09352	0.33819	0.09352	0.30924	0.09352	0.85169	0.09352	0.7851	0.09352	0.51355
1.16545	0.01952	0.00749	0.000449932		5.06968	0.48633	1.97007	0.27397		0.09633	0.27397	0.09633	0.38028	0.09633	0.29824	0.09633	0.85623	0.09633	0.8131	0.09633	0.48633
1.17165	0.01646	0.00685	0.00321		5.06682	0.45505	1.96721	0.30605		0.09919	0.30605	0.09919	0.35974	0.09919	0.23475	0.09919	0.80157	0.09919	0.77141	0.09919	0.45505
1.17785	0.01223	0.00735	0.00116		5.06393	0.48098	1.96432	0.28162		0.10208	0.28162	0.10208	0.31388	0.10208	0.23009	0.10208	0.8003	0.10208	0.69474	0.10208	0.48098
1.18405	0.01757	0.00709	0.000517769		5.06099	0.51685	1.96138	0.23357		0.10502	0.23357	0.10502	0.30881	0.10502	0.30327	0.10502	0.81668	0.10502	0.61832	0.10502	0.51685
1.19025	0.02254	0.00748	-0.00177		5.05801	0.47982	1.9584	0.27343		0.108	0.27343	0.108	0.32566	0.108	0.33852	0.108	0.79258	0.108	0.59823	0.108	0.47982
1.19645	0.02602	0.00827	-0.00109		5.05499	0.42793	1.95538	0.32236		0.11102	0.32236	0.11102	0.29766	0.11102	0.29308	0.11102	0.82023	0.11102	0.6437	0.11102	0.42793
1.20265	0.01646	0.00829	-0.000620975		5.05193	0.43046	1.95232	0.29577		0.11408	0.29577	0.11408	0.26703	0.11408	0.26354	0.11408	0.83999	0.11408	0.67908	0.11408	0.43046
1.20885	0.02288	0.00868	0.00463		5.04882	0.47638	1.94921	0.24905		0.11719	0.24905	0.11719	0.29245	0.11719	0.29339	0.11719	0.81459	0.11719	0.63036	0.11719	0.47638
1.21505	0.02219	0.00887	0.00278		5.04568	0.50848	1.94607	0.23687		0.12033	0.23687	0.12033	0.33911	0.12033	0.2836	0.12033	0.82131	0.12033	0.61414	0.12033	0.50848
1.22124	0.01094	0.0094	0.00549		5.04249	0.46485	1.94288	0.23166		0.12352	0.23166	0.12352	0.33543	0.12352	0.23203	0.12352	0.80427	0.12352	0.66408	0.12352	0.46485
1.22744	0.02898	0.00963	0.00259		5.03926	0.45026	1.93965	0.22003		0.12675	0.22003	0.12675	0.28914	0.12675	0.23199	0.12675	0.79595	0.12675	0.63954	0.12675	0.45026
1.23364	0.01633	0.01045	0.0006691		5.03599	0.47363	1.93638	0.20694		0.13002	0.20694	0.13002	0.25194	0.13002	0.25202	0.13002	0.80308	0.13002	0.58729	0.13002	0.47363
1.23984	0.02744	0.01083	0.000206992		5.03268	0.42252	1.93307	0.19203		0.13333	0.19203	0.13333	0.25356	0.13333	0.25834	0.13333	0.7655	0.13333	0.62716	0.13333	0.42252
1.24604	0.01254	0.01046	-0.00102		5.02932	0.38762	1.92971	0.18279		0.13669	0.18279	0.13669	0.28	0.13669	0.26609	0.13669	0.70962	0.13669	0.69004	0.13669	0.38762
1.25224	0.02077	0.0108	0.00114		5.02593	0.42054	1.92632	0.20429		0.14008	0.20429	0.14008	0.26858	0.14008	0.24687	0.14008	0.68021	0.14008	0.65736	0.14008	0.42054
1.25844	0.03331	0.01085	-0.00145		5.02249	0.40743	1.92288	0.22462		0.14352	0.22462	0.14352	0.23488	0.14352	0.2156	0.14352	0.68738	0.14352	0.53808	0.14352	0.40743
1.26464	0.01012	0.01105	-0.00155		5.01901	0.36758	1.9194	0.20731		0.147	0.20731	0.147	0.23437	0.147	0.21462	0.147	0.69246	0.147	0.50394	0.147	0.36758
1.27084	0.02122	0.01212	-0.00151		5.01549	0.37651	1.91588	0.19217		0.15052	0.19217	0.15052	0.21996	0.15052	0.23165	0.15052	0.67058	0.15052	0.56045	0.15052	0.37651
1.27704	0.0278	0.01147	0.00362		5.01193	0.41112	1.91232	0.17992		0.15408	0.17992	0.15408	0.18399	0.15408	0.18989	0.15408	0.63075	0.15408	0.56136	0.15408	0.41112
1.28324	0.02455	0.01221	0.00223		5.00832	0.41978	1.90871	0.14862		0.15769	0.14862	0.15769	0.1608	0.15769	0.11841	0.15769	0.56568	0.15769	0.50682	0.15769	0.41978
1.28944	0.02502	0.01265	-2.37722e-05		5.00468	0.38504	1.90507	0.15254		0.16133	0.15254	0.16133	0.17842	0.16133	0.11257	0.16133	0.55539	0.16133	0.52342	0.16133	0.38504
1.29563	0.02354	0.01293	-0.00129		5.00099	0.35749	1.90138	0.1661		0.16502	0.1661	0.16502	0.20207	0.16502	0.1343	0.16502	0.55108	0.16502	0.54677	0.16502	0.35749
1.30183	0.03197	0.01317	-0.00134		4.99726	0.39643	1.89765	0.14597		0.16875	0.14597	0.16875	0.2111	0.16875	0.13849	0.16875	0.49583	0.16875	0.5047	0.16875	0.39643
1.30803	0.03273	0.014	0.000780423		4.99349	0.41576	1.89388	0.14111		0.17252	0.14111	0.17252	0.19107	0.17252	0.1114	0.17252	0.46507	0.17252	0.48107	0.17252	0.41576
1.31423	0.02736	0.01428	0.00342		4.98968	0.40552	1.89007	0.13981		0.17633	0.13981	0.17633	0.14806	0.17633	0.08043	0.17633	0.48838	0.17633	0.46236	0.17633	0.40552
1.32043	0.03019	0.01437	0.00586		4.98582	0.39643	1.88621	0.12038		0.18019	0.12038	0.18019	0.12227	0.18019	0.10206	0.18019	0.48627	0.18019	0.41483	0.18019	0.39643
1.32663	0.00767	0.01406	0.000931753		4.98193	0.36873	1.88232	0.13109		0.18408	0.13109	0.18408	0.13305	0.18408	0.09803	0.18408	0.46044	0.18408	0.44967	0.18408	0.36873
1.33283	0.03213	0.01471	0.000836085		4.97799	0.39838	1.87838	0.14327		0.18802	0.14327	0.18802	0.15088	0.18802	0.08589	0.18802	0.48818	0.18802	0.53308	0.18802	0.39838
1.33903	0.01362	0.01536	0.00104		4.97401	0.44198	1.8744	0.12402		0.192	0.12402	0.192	0.15755	0.192	0.14149	0.192	0.5043	0.192	0.51834	0.192	0.44198
1.34523	0.01985	0.01598	0.000822749		4.96999	0.4134	1.87038	0.09311		0.19602	0.09311	0.19602	0.1392	0.19602	0.1854	0.19602	0.43082	0.19602	0.47046	0.19602	0.4134
1.35143	0.03203	0.01584	0.0028		4.96593	0.40684	1.86632	0.09232		0.20008	0.09232	0.20008	0.10219	0.20008	0.15544	0.20008	0.37884	0.20008	0.46994	0.20008	0.40684
1.35763	0.03155	0.01583	0.00176		4.96182	0.4064	1.86221	0.11684		0.20419	0.11684	0.20419	0.10776	0.20419	0.07797	0.20419	0.38025	0.20419	0.46056	0.20419	0.4064
1.36383	0.02772	0.01695	0.00256		4.95768	0.37862	1.85807	0.10142		0.20833	0.10142	0.20833	0.15097	0.20833	0.06495	0.20833	0.3747	0.20833	0.42643	0.20833	0.37862
1.37003	0.02795	0.01687	0.00205		4.95349	0.36366	1.85388	0.08281		0.21252	0.08281	0.21252	0.14569	0.21252	0.09626	0.21252	0.40869	0.21252	0.39278	0.21252	0.36366
1.37622	0.0343	0.0173	0.000907981		4.94926	0.34484	1.84965	0.0972		0.21675	0.0972	0.21675	0.10849	0.21675	0.09534	0.21675	0.4639	0.21675	0.36707	0.21675	0.34484
1.38242	0.027	0.01671	0.0061		4.94499	0.32499	1.84538	0.10269		0.22102	0.10269	0.22102	0.11225	0.22102	0.11281	0.22102	0.40789	0.22102	0.35077	0.22102	0.32499
1.38862	0.02543	0.01831	0.00598		4.94068	0.34148	1.84107	0.08834		0.22533	0.08834	0.22533	0.11806	0.22533	0.13371	0.22533	0.32721	0.22533	0.37295	0.22533	0.34148
1.39482	0.02026	0.01999	0.00205		4.93632	0.36768	1.83671	0.0652		0.22969	0.0652	0.22969	0.11112	0.22969	0.11691	0.22969	0.31912	0.22969	0.38941	0.22969	0.36768
1.40102	0.02169	0.01841	-0.000103786		4.93193	0.35015	1.83232	0.06401		0.23408	0.06401	0.23408	0.10207	0.23408	0.08887	0.23408	0.34818	0.23408	0.38169	0.23408	0.35015
1.40722	0.02535	0.01855	0.00194		4.92749	0.32734	1.82788	0.07063		0.23852	0.07063	0.23852	0.07416	0.23852	0.04368	0.23852	0.34781	0.23852	0.3737	0.23852	0.32734
1.41342	0.01547	0.01804	0.00347		4.92301	0.35651	1.8234	0.05224		0.243	0.05224	0.243	0.05965	0.243	0.0394	0.243	0.32641	0.243	0.37904	0.243	0.35651
1.41962	0.02548	0.01948	0.00646		4.91849	0.36074	1.81888	0.04077		0.24752	0.04077	0.24752	0.09317	0.24752	0.08238	0.24752	0.31472	0.24752	0.41707	0.24752	0.36074
1.42582	0.03978	0.02044	0.00244		4.91393	0.34272	1.81432	0.07191		0.25208	0.07191	0.25208	0.12792	0.25208	0.07459	0.25208	0.31029	0.25208	0.44374	0.25208	0.34272
1.43202	0.01986	0.01862	0.00175		4.90932	0.36477	1.80971	0.0974		0.25669	0.0974	0.25669	0.11151	0.25669	0.04355	0.25669	0.35074	0.25669	0.39011	0.25669	0.36477
1.43822	0.02678	0.01821	0.00726		4.90468	0.36361	1.80507	0.09646		0.26133	0.09646	0.26133	0.089	0.26133	0.08134	0.26133	0.37996	0.26133	0.36521	0.26133	0.36361
1.44442	0.0085	0.01949	0.00323		4.89999	0.34997	1.80038	0.0888		0.26602	0.0888	0.26602	0.0918	0.26602	0.12435	0.26602	0.31541	0.26602	0.39238	0.26602	0.34997
1.45062	0.01915	0.01831	0.00421		4.89526	0.3316	1.79565	0.06648		0.27075	0.06648	0.27075	0.0871	0.27075	0.06029	0.27075	0.26976	0.27075	0.36143	0.27075	0.3316
1.45681	0.02159	0.01961	0.00229		4.89049	0.32981	1.79088	0.05175		0.27552	0.05175	0.27552	0.073	0.27552	0.00546	0.27552	0.28964	0.27552	0.33296	0.27552	0.32981
1.46301	0.03535	0.0218	0.0016		4.88568	0.40573	1.78607	0.04768		0.28033	0.04768	0.28033	0.07223	0.28033	0.07756	0.28033	0.30493	0.28033	0.35759	0.28033	0.40573
1.46921	0.02139	0.01984	-0.00287		4.88082	0.44599	1.78121	0.05808		0.28519	0.05808	0.28519	0.08733	0.28519	0.10002	0.28519	0.27565	0.28519	0.38562	0.28519	0.44599
1.47541	0.01929	0.02103	-0.000860437		4.87593	0.38514	1.77632	0.08002		0.29008	0.08002	0.29008	0.10706	0.29008	0.05738	0.29008	0.25684	0.29008	0.43574	0.29008	0.38514
1.48161	0.02181	0.01866	0.00342		4.87099	0.34081	1.77138	0.07816		0.29502	0.07816	0.29502	0.10733	0.29502	0.06298	0.29502	0.27152	0.29502	0.46856	0.29502	0.34081
1.48781	0.0157	0.02033	0.00104		4.86601	0.36154	1.7664	0.06432		0.3	0.06432	0.3	0.0802	0.3	0.06438	0.3	0.2877	0.3	0.42748	0.3	0.36154
1.49401	0.03035	0.01894	0.00361		4.86099	0.39326	1.76138	0.07746		0.30502	0.07746	0.30502	0.05672	0.30502	0.06535	0.30502	0.30955	0.30502	0.37885	0.30502	0.39326
1.50021	0.02714	0.02103	0.00586		4.85593	0.39457	1.75632	0.10596		0.31008	0.10596	0.31008	0.06848	0.31008	0.11508	0.31008	0.31542	0.31008	0.40171	0.31008	0.39457
1.50641	0.01714	0.02137	0.00518		4.85082	0.36287	1.75121	0.09822		0.31519	0.09822	0.31519	0.09648	0.31519	0.12091	0.31519	0.28776	0.31519	0.41419	0.31519	0.36287
1.51261	0.02794	0.01964	0.00482		4.84568	0.3969	1.74607	0.06641		0.32033	0.06641	0.32033	0.09129	0.32033	0.04779	0.32033	0.2734	0.32033	0.38115	0.32033	0.3969
1.51881	0.01704	0.02127	0.00412		4.84049	0.42275	1.74088	0.05352		0.32552	0.05352	0.32552	0.06908	0.32552	3.94248e-05	0.32552	0.27098	0.32552	0.37241	0.32552	0.42275
1.52501	0.01941	0.0194	0.000382094		4.83526	0.38681	1.73565	0.07624		0.33075	0.07624	0.33075	0.07352	0.33075	0.05287	0.33075	0.26014	0.33075	0.34909	0.33075	0.38681
1.5312	0.02537	0.02187	0.000860437		4.82999	0.3614	1.73038	0.07897		0.33602	0.07897	0.33602	0.08619	0.33602	0.1091	0.33602	0.26002	0.33602	0.3226	0.33602	0.3614
1.5374	0.02652	0.02079	0.00249		4.82468	0.36376	1.72507	0.05029		0.34133	0.05029	0.34133	0.07686	0.34133	0.09517	0.34133	0.28161	0.34133	0.377	0.34133	0.36376
1.5436	0.01431	0.02158	-0.000645327		4.81932	0.37626	1.71971	0.05322		0.34669	0.05322	0.34669	0.06515	0.34669	0.08938	0.34669	0.26743	0.34669	0.41128	0.34669	0.37626
1.5498	0.02276	0.01973	0.00124		4.81393	0.37518	1.71432	0.08327		0.35208	0.08327	0.35208	0.07149	0.35208	0.08835	0.35208	0.23061	0.35208	0.37449	0.35208	0.37518
1.556	0.02397	0.01986	0.00104		4.80849	0.37337	1.70888	0.09747		0.35752	0.09747	0.35752	0.08723	0.35752	0.05285	0.35752	0.2117	0.35752	0.3651	0.35752	0.37337
1.5622	0.01714	0.02112	0.00209		4.80301	0.38742	1.7034	0.08662		0.363	0.08662	0.363	0.08406	0.363	0.01148	0.363	0.22271	0.363	0.37448	0.363	0.38742
1.5684	0.02063	0.02069	-0.000103786		4.79749	0.37715	1.69788	0.0752		0.36852	0.0752	0.36852	0.06717	0.36852	0.00349	0.36852	0.24032	0.36852	0.35291	0.36852	0.37715
1.5746	0.03469	0.02311	0.00192		4.79193	0.32243	1.69232	0.08566		0.37408	0.08566	0.37408	0.08295	0.37408	0.02068	0.37408	0.22747	0.37408	0.33165	0.37408	0.32243
1.5808	0.01298	0.02171	0.003		4.78632	0.3499	1.68671	0.07745		0.37969	0.07745	0.37969	0.08357	0.37969	0.02308	0.37969	0.21354	0.37969	0.35012	0.37969	0.3499
1.587	0.03415	0.02259	-0.00114		4.78068	0.42407	1.68107	0.06514		0.38533	0.06514	0.38533	0.06603	0.38533	0.05121	0.38533	0.22583	0.38533	0.36451	0.38533	0.42407
1.5932	0.0171	0.0227	-0.00385		4.77499	0.36561	1.67538	0.07436		0.39102	0.07436	0.39102	0.06572	0.39102	0.07442	0.39102	0.2295	0.39102	0.36908	0.39102	0.36561
1.5994	0.03181	0.02453	-0.000367019		4.76926	0.31662	1.66965	0.06954		0.39675	0.06954	0.39675	0.07629	0.39675	0.02392	0.39675	0.24861	0.39675	0.37354	0.39675	0.31662
1.6056	0.03032	0.02241	-0.00414		4.76349	0.33136	1.66388	0.07404		0.40252	0.07404	0.40252	0.09412	0.40252	0.01018	0.40252	0.2407	0.40252	0.32649	0.40252	0.33136
1.61179	0.00668	0.02197	-0.00389		4.75768	0.30978	1.65807	0.06685		0.40833	0.06685	0.40833	0.07911	0.40833	0.0654	0.40833	0.19127	0.40833	0.29878	0.40833	0.30978
1.61799	0.02197	0.02184	-0.003		4.75182	0.31411	1.65221	0.02577		0.41419	0.02577	0.41419	0.04122	0.41419	0.0537	0.41419	0.1676	0.41419	0.31837	0.41419	0.31411
1.62419	0.01722	0.02242	-0.00145		4.74593	0.35972	1.64632	0.03378		0.42008	0.03378	0.42008	0.02785	0.42008	0.0166	0.42008	0.1837	0.42008	0.32289	0.42008	0.35972
1.63039	0.02265	0.02384	-0.00166		4.73999	0.35405	1.64038	0.07776		0.42602	0.07776	0.42602	0.03775	0.42602	0.02456	0.42602	0.18604	0.42602	0.33849	0.42602	0.35405
1.63659	0.02134	0.02285	-0.00233		4.73401	0.31007	1.6344	0.0819		0.432	0.0819	0.432	0.05178	0.432	0.03114	0.432	0.1585	0.432	0.3829	0.432	0.31007
1.64279	0.0258	0.02294	-0.00155		4.72799	0.31093	1.62838	0.07552		0.43802	0.07552	0.43802	0.06032	0.43802	0.01904	0.43802	0.12994	0.43802	0.38047	0.43802	0.31093
1.64899	0.02984	0.02186	-0.000350205		4.72193	0.34937	1.62232	0.07277		0.44408	0.07277	0.44408	0.04156	0.44408	0.01081	0.44408	0.13853	0.44408	0.32831	0.44408	0.34937
1.65519	0.00115	0.02252	0.00138		4.71582	0.37481	1.61621	0.04393		0.45019	0.04393	0.45019	0.02739	0.45019	0.02046	0.45019	0.18241	0.45019	0.31005	0.45019	0.37481
1.66139	0.02194	0.02386	0.00522		4.70968	0.36061	1.61007	0.04312		0.45633	0.04312	0.45633	0.04003	0.45633	0.00993	0.45633	0.19186	0.45633	0.3392	0.45633	0.36061
1.66759	0.01666	0.02498	0.0064		4.70349	0.3123	1.60388	0.08392		0.46252	0.08392	0.46252	0.05078	0.46252	0.00119	0.46252	0.15954	0.46252	0.34212	0.46252	0.3123
1.67379	0.01648	0.02122	0.00324		4.69726	0.2947	1.59765	0.08697		0.46875	0.08697	0.46875	0.0437	0.46875	0.02664	0.46875	0.15157	0.46875	0.33873	0.46875	0.2947
1.67999	0.02258	0.02428	0.00438		4.69099	0.29168	1.59138	0.05351		0.47502	0.05351	0.47502	0.03547	0.47502	0.0353	0.47502	0.1403	0.47502	0.35464	0.47502	0.29168
1.68619	0.00643	0.02235	0.00652		4.68468	0.28008	1.58507	0.05824		0.48133	0.05824	0.48133	0.04855	0.48133	0.01029	0.48133	0.12863	0.48133	0.33586	0.48133	0.28008
1.69238	0.01789	0.02284	0.00456		4.67832	0.32228	1.57871	0.0838		0.48769	0.0838	0.48769	0.06101	0.48769	0	0.48769	0.15734	0.48769	0.29598	0.48769	0.32228
1.69858	0.02339	0.02363	0.00473		4.67193	0.36234	1.57232	0.0694		0.49408	0.0694	0.49408	0.04888	0.49408	0.02731	0.49408	0.14971	0.49408	0.3043	0.49408	0.36234
1.70478	0.00931	0.02488	0.00228		4.66549	0.31021	1.56588	0.06323		0.50052	0.06323	0.50052	0.03094	0.50052	0.04893	0.50052	0.11247	0.50052	0.33108	0.50052	0.31021
1.71098	0.01953	0.02588	0.000413984		4.65901	0.27968	1.5594	0.06949		0.507	0.06949	0.507	0.01006	0.507	0.01341	0.507	0.11156	0.507	0.32035	0.507	0.27968
1.71718	0.01982	0.02039	0.00015133		4.65249	0.32085	1.55288	0.05907		0.51352	0.05907	0.51352	0.00319	0.51352	0	0.51352	0.12624	0.51352	0.30195	0.51352	0.32085
1.72338	0.01554	0.02172	-0.000586767		4.64593	0.33825	1.54632	0.07285		0.52008	0.07285	0.52008	0.02392	0.52008	0.00794	0.52008	0.13813	0.52008	0.31893	0.52008	0.33825
1.72958	0.02484	0.01994	0.00135		4.63932	0.29683	1.53971	0.11106		0.52669	0.11106	0.52669	0.05015	0.52669	0.05995	0.52669	0.14229	0.52669	0.34042	0.52669	0.29683
1.73578	0.02409	0.02211	-0.000194816		4.63268	0.26778	1.53307	0.12035		0.53333	0.12035	0.53333	0.06951	0.53333	0.05678	0.53333	0.13977	0.53333	0.3027	0.53333	0.26778
1.74198	0.0239	0.02337	-0.000884209		4.62599	0.28084	1.52638	0.10154		0.54002	0.10154	0.54002	0.06029	0.54002	0.02311	0.54002	0.14786	0.54002	0.27292	0.54002	0.28084
1.74818	0.02412	0.01779	-0.00157		4.61926	0.30103	1.51965	0.09457		0.54675	0.09457	0.54675	0.03852	0.54675	0.01959	0.54675	0.14901	0.54675	0.31069	0.54675	0.30103
1.75438	0.02752	0.0195	-0.00166		4.61249	0.30048	1.51288	0.09897		0.55352	0.09897	0.55352	0.03477	0.55352	0.01121	0.55352	0.12803	0.55352	0.31913	0.55352	0.30048
1.76058	0.0313	0.02091	0.00045399		4.60568	0.29282	1.50607	0.11221		0.56033	0.11221	0.56033	0.03312	0.56033	0	0.56033	0.09788	0.56033	0.29414	0.56033	0.29282
1.76677	0.02173	0.02145	0.00141		4.59882	0.2918	1.49921	0.11649		0.56719	0.11649	0.56719	0.03549	0.56719	0.00766	0.56719	0.09333	0.56719	0.2929	0.56719	0.2918
1.77297	0.02378	0.01995	0.00366		4.59193	0.2864	1.49232	0.11339		0.57408	0.11339	0.57408	0.05359	0.57408	0.00487	0.57408	0.11014	0.57408	0.30868	0.57408	0.2864
1.77917	0.01781	0.02373	0.00317		4.58499	0.281	1.48538	0.0975		0.58102	0.0975	0.58102	0.05713	0.58102	0	0.58102	0.08992	0.58102	0.30693	0.58102	0.281
1.78537	0.01534	0.02548	0.0048		4.57801	0.29211	1.4784	0.07904		0.588	0.07904	0.588	0.03449	0.588	0.00299	0.588	0.08239	0.588	0.28034	0.588	0.29211
1.79157	0.02802	0.02329	0.00117		4.57099	0.28325	1.47138	0.07163		0.59502	0.07163	0.59502	0.02538	0.59502	0.01101	0.59502	0.11237	0.59502	0.25499	0.59502	0.28325
1.79777	0.02998	0.02484	0.00364		4.56393	0.24836	1.46432	0.0692		0.60208	0.0692	0.60208	0.03393	0.60208	0.00539	0.60208	0.11986	0.60208	0.25636	0.60208	0.24836
1.80397	0.03519	0.02368	0.00393		4.55682	0.23205	1.45721	0.08462		0.60919	0.08462	0.60919	0.03205	0.60919	0.01765	0.60919	0.10405	0.60919	0.27598	0.60919	0.23205
1.81017	0.01768	0.0263	0.0021		4.54968	0.24712	1.45007	0.11165		0.61633	0.11165	0.61633	0.03456	0.61633	0	0.61633	0.10962	0.61633	0.26043	0.61633	0.24712
1.81637	0.0311	0.02691	0.00477		4.54249	0.24813	1.44288	0.12867		0.62352	0.12867	0.62352	0.04546	0.62352	0	0.62352	0.13119	0.62352	0.23539	0.62352	0.24813
1.82257	0.02663	0.02837	0.00619		4.53526	0.23699	1.43565	0.12051		0.63075	0.12051	0.63075	0.04183	0.63075	0.054	0.63075	0.12428	0.63075	0.25229	0.63075	0.23699
1.82877	0.02484	0.02812	0.0058		4.52799	0.23682	1.42838	0.08793		0.63802	0.08793	0.63802	0.03535	0.63802	0.08654	0.63802	0.10275	0.63802	0.25651	0.63802	0.23682
1.83497	0.02361	0.028	0.00466		4.52068	0.23183	1.42107	0.10744		0.64533	0.10744	0.64533	0.053	0.64533	0.03292	0.64533	0.10211	0.64533	0.22515	0.64533	0.23183
1.84117	0.04015	0.02797	0.00192		4.51332	0.22978	1.41371	0.17195		0.65269	0.17195	0.65269	0.06091	0.65269	0	0.65269	0.11608	0.65269	0.19565	0.65269	0.22978
1.84736	0.02456	0.03226	0.00114		4.50593	0.23072	1.40632	0.17202		0.66008	0.17202	0.66008	0.0767	0.66008	0.01444	0.66008	0.13022	0.66008	0.2021	0.66008	0.23072
1.85356	0.02653	0.03029	0.00448		4.49849	0.22906	1.39888	0.1532		0.66752	0.1532	0.66752	0.09748	0.66752	0.02466	0.66752	0.11451	0.66752	0.21482	0.66752	0.22906
1.85976	0.03783	0.0337	0.00559		4.49101	0.24016	1.3914	0.17136		0.675	0.17136	0.675	0.08108	0.675	0.00925	0.675	0.07977	0.675	0.20576	0.675	0.24016
1.86596	0.04286	0.03091	0.000413984		4.48349	0.22089	1.38388	0.17506		0.68252	0.17506	0.68252	0.06142	0.68252	0.00163	0.68252	0.07387	0.68252	0.19663	0.68252	0.22089
1.87216	0.03036	0.034	-0.000166985		4.47593	0.20212	1.37632	0.18441		0.69008	0.18441	0.69008	0.06587	0.69008	0.03052	0.69008	0.09704	0.69008	0.18276	0.69008	0.20212
1.87836	0.03527	0.03431	-0.000310778		4.46832	0.21973	1.36871	0.21241		0.69769	0.21241	0.69769	0.07153	0.69769	0.06682	0.69769	0.10931	0.69769	0.15659	0.69769	0.21973
1.88456	0.04997	0.0364	-0.00178		4.46068	0.20997	1.36107	0.20548		0.70533	0.20548	0.70533	0.06427	0.70533	0.02829	0.70533	0.09577	0.70533	0.14142	0.70533	0.20997
1.89076	0.03872	0.03804	-0.000119441		4.45299	0.17441	1.35338	0.18703		0.71302	0.18703	0.71302	0.08427	0.71302	0	0.71302	0.1047	0.71302	0.14933	0.71302	0.17441
1.89696	0.04086	0.03914	-0.00186		4.44526	0.16882	1.34565	0.18745		0.72075	0.18745	0.72075	0.11245	0.72075	0.01778	0.72075	0.13381	0.72075	0.13912	0.72075	0.16882
1.90316	0.04354	0.03676	0.00104		4.43749	0.1981	1.33788	0.17736		0.72852	0.17736	0.72852	0.09578	0.72852	0.07088	0.72852	0.13607	0.72852	0.11927	0.72852	0.1981
1.90936	0.05882	0.04023	0.000761289		4.42968	0.22151	1.33007	0.14897		0.73633	0.14897	0.73633	0.08094	0.73633	0.02862	0.73633	0.13013	0.73633	0.12689	0.73633	0.22151
1.91556	0.04517	0.04226	0.00237		4.42182	0.19826	1.32221	0.13421		0.74419	0.13421	0.74419	0.08956	0.74419	0	0.74419	0.12424	0.74419	0.14437	0.74419	0.19826
1.92176	0.04629	0.04416	0.00224		4.41393	0.17592	1.31432	0.14885		0.75208	0.14885	0.75208	0.08852	0.75208	0.00358	0.75208	0.13264	0.75208	0.15466	0.75208	0.17592
1.92795	0.03655	0.04654	0.0035		4.40599	0.19197	1.30638	0.16329		0.76002	0.16329	0.76002	0.1107	0.76002	0.02125	0.76002	0.1425	0.76002	0.12644	0.76002	0.19197
1.93415	0.04612	0.04586	0.00267		4.39801	0.19144	1.2984	0.14953		0.768	0.14953	0.768	0.13204	0.768	0.00617	0.768	0.14084	0.768	0.08491	0.768	0.19144
1.94035	0.04192	0.05152	0.00278		4.38999	0.16862	1.29038	0.13987		0.77602	0.13987	0.77602	0.14246	0.77602	0	0.77602	0.1375	0.77602	0.10128	0.77602	0.16862
1.94655	0.04255	0.04816	0.00323		4.38193	0.15082	1.28232	0.16017		0.78408	0.16017	0.78408	0.16567	0.78408	0.00648	0.78408	0.12178	0.78408	0.13266	0.78408	0.15082
1.95275	0.04426	0.05337	0.0028		4.37382	0.14908	1.27421	0.15399		0.79219	0.15399	0.79219	0.14627	0.79219	0.03546	0.79219	0.11113	0.79219	0.1062	0.79219	0.14908
1.95895	0.05109	0.05276	0.00693		4.36568	0.16612	1.26607	0.13284		0.80033	0.13284	0.80033	0.12158	0.80033	0.05237	0.80033	0.106	0.80033	0.06409	0.80033	0.16612
1.96515	0.03555	0.05562	0.01098		4.35749	0.17654	1.25788	0.14098		0.80852	0.14098	0.80852	0.11719	0.80852	0.01852	0.80852	0.08453	0.80852	0.07251	0.80852	0.17654
1.97135	0.05272	0.06062	0.00845		4.34926	0.17225	1.24965	0.16158		0.81675	0.16158	0.81675	0.13346	0.81675	0	0.81675	0.08492	0.81675	0.09579	0.81675	0.17225
1.97755	0.04845	0.06142	0.00684		4.34099	0.16778	1.24138	0.18449		0.82502	0.18449	0.82502	0.1595	0.82502	0.0088	0.82502	0.10832	0.82502	0.08619	0.82502	0.16778
1.98375	0.04656	0.06353	0.00744		4.33268	0.16804	1.23307	0.19633		0.83333	0.19633	0.83333	0.16209	0.83333	0.06394	0.83333	0.10378	0.83333	0.06607	0.83333	0.16804
1.98995	0.0482	0.06404	0.00943		4.32432	0.17455	1.22471	0.19373		0.84169	0.19373	0.84169	0.15853	0.84169	0.04892	0.84169	0.09641	0.84169	0.06579	0.84169	0.17455
1.99615	0.04799	0.06757	0.00712		4.31593	0.17644	1.21632	0.20862		0.85008	0.20862	0.85008	0.17447	0.85008	0.02482	0.85008	0.11727	0.85008	0.08046	0.85008	0.17644
2.00234	0.05609	0.06932	0.00536		4.30749	0.16626	1.20788	0.23094		0.85852	0.23094	0.85852	0.18812	0.85852	0.02867	0.85852	0.11749	0.85852	0.07866	0.85852	0.16626
2.00854	0.05356	0.0696	0.00818		4.29901	0.15591	1.1994	0.23809		0.867	0.23809	0.867	0.19159	0.867	0.00668	0.867	0.10461	0.867	0.06317	0.867	0.15591
2.01474	0.05957	0.07137	0.00726		4.29049	0.15929	1.19088	0.22273		0.87552	0.22273	0.87552	0.20625	0.87552	0	0.87552	0.10597	0.87552	0.04963	0.87552	0.15929
2.02094	0.04726	0.07369	0.00511		4.28193	0.16579	1.18232	0.20212		0.88408	0.20212	0.88408	0.23881	0.88408	0.01279	0.88408	0.10246	0.88408	0.0587	0.88408	0.16579
2.02714	0.06253	0.07434	0.00949		4.27332	0.15137	1.17371	0.18519		0.89269	0.18519	0.89269	0.26021	0.89269	0.03065	0.89269	0.09545	0.89269	0.06997	0.89269	0.15137
2.03334	0.04947	0.07675	0.00875		4.26468	0.14162	1.16507	0.1742		0.90133	0.1742	0.90133	0.23951	0.90133	0.03549	0.90133	0.08602	0.90133	0.06217	0.90133	0.14162
2.03954	0.06877	0.08226	0.00839		4.25599	0.14843	1.15638	0.16253		0.91002	0.16253	0.91002	0.22834	0.91002	0.04803	0.91002	0.07568	0.91002	0.0653	0.91002	0.14843
2.04574	0.06382	0.08092	0.00458		4.24726	0.1483	1.14765	0.15383		0.91875	0.15383	0.91875	0.27807	0.91875	0.09408	0.91875	0.06533	0.91875	0.07764	0.91875	0.1483
2.05194	0.05918	0.0829	0.00903		4.23849	0.14963	1.13888	0.14085		0.92752	0.14085	0.92752	0.30113	0.92752	0.10521	0.92752	0.08661	0.92752	0.06337	0.92752	0.14963
2.05814	0.06735	0.08408	0.0084		4.22968	0.14914	1.13007	0.12866		0.93633	0.12866	0.93633	0.30783	0.93633	0.0217	0.93633	0.10692	0.93633	0.04385	0.93633	0.14914
2.06434	0.05605	0.0894	0.00941		4.22082	0.13766	1.12121	0.12595		0.94519	0.12595	0.94519	0.34369	0.94519	0	0.94519	0.08668	0.94519	0.04621	0.94519	0.13766
2.07054	0.06442	0.0922	0.01682		4.21193	0.13243	1.11232	0.12566		0.95408	0.12566	0.95408	0.35402	0.95408	0.0501	0.95408	0.09553	0.95408	0.04488	0.95408	0.13243
2.07674	0.06626	0.09749	0.0125		4.20299	0.1329	1.10338	0.12854		0.96302	0.12854	0.96302	0.34368	0.96302	0.05697	0.96302	0.12334	0.96302	0.03531	0.96302	0.1329
2.08293	0.06582	0.09627	0.01427		4.19401	0.13611	1.0944	0.13309		0.972	0.13309	0.972	0.345	0.972	0.04782	0.972	0.11229	0.972	0.041	0.972	0.13611
2.08913	0.06115	0.09495	0.01325		4.18499	0.14864	1.08538	0.13525		0.98102	0.13525	0.98102	0.34202	0.98102	0.05613	0.98102	0.09153	0.98102	0.0564	0.98102	0.14864
2.09533	0.07848	0.10331	0.01551		4.17593	0.15807	1.07632	0.13526		0.99008	0.13526	0.99008	0.32698	0.99008	0.05434	0.99008	0.08273	0.99008	0.05239	0.99008	0.15807
2.10153	0.07892	0.10623	0.01843		4.16682	0.15617	1.06721	0.14358		0.99919	0.14358	0.99919	0.34764	0.99919	0.08542	0.99919	0.06072	0.99919	0.04537	0.99919	0.15617
2.10773	0.06818	0.10801	0.01843		4.15768	0.14169	1.05807	0.15233		1.00833	0.15233	1.00833	0.39591	1.00833	0.11243	1.00833	0.06611	1.00833	0.0636	1.00833	0.14169
2.11393	0.08076	0.11312	0.02029		4.14849	0.13129	1.04888	0.14407		1.01752	0.14407	1.01752	0.39798	1.01752	0.07939	1.01752	0.10236	1.01752	0.06173	1.01752	0.13129
2.12013	0.07969	0.1089	0.01917		4.13926	0.14351	1.03965	0.12476		1.02675	0.12476	1.02675	0.36525	1.02675	0.03266	1.02675	0.11395	1.02675	0.03204	1.02675	0.14351
2.12633	0.08168	0.11742	0.02236		4.12999	0.15349	1.03038	0.11327		1.03602	0.11327	1.03602	0.39468	1.03602	0.03061	1.03602	0.10106	1.03602	0.02202	1.03602	0.15349
2.13253	0.08584	0.12629	0.02696		4.12068	0.1406	1.02107	0.10623		1.04533	0.10623	1.04533	0.43951	1.04533	0.04216	1.04533	0.10486	1.04533	0.03473	1.04533	0.1406
2.13873	0.10976	0.13079	0.02792		4.11132	0.12866	1.01171	0.09381		1.05469	0.09381	1.05469	0.45414	1.05469	0.0722	1.05469	0.12664	1.05469	0.0545	1.05469	0.12866
2.14493	0.09683	0.12895	0.02758		4.10193	0.13012	1.00232	0.08826		1.06408	0.08826	1.06408	0.47808	1.06408	0.09295	1.06408	0.1285	1.06408	0.06213	1.06408	0.13012
2.15113	0.08668	0.13478	0.02924		4.09249	0.12844	0.99288	0.07962		1.07352	0.07962	1.07352	0.47965	1.07352	0.09222	1.07352	0.11777	1.07352	0.04926	1.07352	0.12844
2.15733	0.09894	0.1385	0.02754		4.08301	0.12476	0.9834	0.05978		1.083	0.05978	1.083	0.46184	1.083	0.08187	1.083	0.13826	1.083	0.05319	1.083	0.12476
2.16352	0.08953	0.13856	0.0332		4.07349	0.11989	0.97388	0.04823		1.09252	0.04823	1.09252	0.46779	1.09252	0.06648	1.09252	0.14269	1.09252	0.06671	1.09252	0.11989
2.16972	0.09569	0.14737	0.03407		4.06393	0.11338	0.96432	0.04274		1.10208	0.04274	1.10208	0.47703	1.10208	0.08908	1.10208	0.11787	1.10208	0.05978	1.10208	0.11338
2.17592	0.10387	0.14531	0.03128		4.05432	0.11905	0.95471	0.03916		1.11169	0.03916	1.11169	0.4881	1.11169	0.12385	1.11169	0.1209	1.11169	0.04915	1.11169	0.11905
2.18212	0.09318	0.15083	0.03426		4.04468	0.12407	0.94507	0.0396		1.12133	0.0396	1.12133	0.49205	1.12133	0.09458	1.12133	0.12075	1.12133	0.05236	1.12133	0.12407
2.18832	0.1044	0.15771	0.035		4.03499	0.11193	0.93538	0.03749		1.13102	0.03749	1.13102	0.44221	1.13102	0.07965	1.13102	0.09979	1.13102	0.05824	1.13102	0.11193
2.19452	0.11153	0.15812	0.03934		4.02526	0.10827	0.92565	0.03149		1.14075	0.03149	1.14075	0.41625	1.14075	0.10353	1.14075	0.08344	1.14075	0.05419	1.14075	0.10827
2.20072	0.11077	0.16525	0.03535		4.01549	0.11487	0.91588	0.02355		1.15052	0.02355	1.15052	0.43667	1.15052	0.10639	1.15052	0.09024	1.15052	0.03864	1.15052	0.11487
2.20692	0.10776	0.15892	0.02972		4.00568	0.10413	0.90607	0.02248		1.16033	0.02248	1.16033	0.42453	1.16033	0.11309	1.16033	0.11057	1.16033	0.03556	1.16033	0.10413
2.21312	0.12259	0.1686	0.03167		3.99582	0.08607	0.89621	0.02533		1.17019	0.02533	1.17019	0.38172	1.17019	0.11788	1.17019	0.12157	1.17019	0.04754	1.17019	0.08607
2.21932	0.12108	0.17462	0.03746		3.98593	0.08218	0.88632	0.02107		1.18008	0.02107	1.18008	0.36345	1.18008	0.1096	1.18008	0.12295	1.18008	0.04848	1.18008	0.08218
2.22552	0.12982	0.17584	0.03694		3.97599	0.08485	0.87638	0.01473		1.19002	0.01473	1.19002	0.38096	1.19002	0.13502	1.19002	0.1306	1.19002	0.04086	1.19002	0.08485
2.23172	0.12868	0.18454	0.03742		3.96601	0.0763	0.8664	0.00943		1.2	0.00943	1.2	0.39733	1.2	0.17061	1.2	0.15531	1.2	0.04091	1.2	0.0763
2.23791	0.13226	0.19482	0.03649		3.95599	0.07148	0.85638	0.00823		1.21002	0.00823	1.21002	0.39291	1.21002	0.15168	1.21002	0.15898	1.21002	0.0437	1.21002	0.07148
2.24411	0.11739	0.19344	0.03649		3.94593	0.0732	0.84632	0.00837		1.22008	0.00837	1.22008	0.38006	1.22008	0.13728	1.22008	0.12878	1.22008	0.04875	1.22008	0.0732
2.25031	0.13321	0.18295	0.03645		3.93582	0.07172	0.83621	0.00846		1.23019	0.00846	1.23019	0.35893	1.23019	0.16469	1.23019	0.10295	1.23019	0.0448	1.23019	0.07172
2.25651	0.13385	0.19519	0.03323		3.92568	0.06896	0.82607	0.01248		1.24033	0.01248	1.24033	0.34127	1.24033	0.16453	1.24033	0.15773	1.24033	0.04177	1.24033	0.06896
2.26271	0.12735	0.20396	0.04118		3.91549	0.06828	0.81588	0.01137		1.25052	0.01137	1.25052	0.33748	1.25052	0.13614	1.25052	0.20664	1.25052	0.04976	1.25052	0.06828
2.26891	0.14113	0.20214	0.04051		3.90526	0.06079	0.80565	0.00428		1.26075	0.00428	1.26075	0.31735	1.26075	0.14149	1.26075	0.18908	1.26075	0.0614	1.26075	0.06079
2.27511	0.13419	0.20238	0.04128		3.89499	0.04276	0.79538	0.000206268		1.27102	0.000206268	1.27102	0.29607	1.27102	0.13436	1.27102	0.16464	1.27102	0.06033	1.27102	0.04276
2.28131	0.14534	0.20092	0.03876		3.88468	0.03714	0.78507	0.00242		1.28133	0.00242	1.28133	0.27922	1.28133	0.08497	1.28133	0.15462	1.28133	0.05176	1.28133	0.03714
2.28751	0.14183	0.2205	0.04075		3.87432	0.04319	0.77471	0.00501		1.29169	0.00501	1.29169	0.24422	1.29169	0.1185	1.29169	0.17285	1.29169	0.05721	1.29169	0.04319
2.29371	0.15862	0.21387	0.04098		3.86393	0.04676	0.76432	0.00518		1.30208	0.00518	1.30208	0.21608	1.30208	0.21992	1.30208	0.19071	1.30208	0.06191	1.30208	0.04676
2.29991	0.15221	0.20949	0.03857		3.85349	0.05012	0.75388	0		1.31252	0	1.31252	0.19562	1.31252	0.2049	1.31252	0.17007	1.31252	0.0499	1.31252	0.05012
2.30611	0.1567	0.22612	0.044		3.84301	0.04597	0.7434	0		1.323	0	1.323	0.1718	1.323	0.14683	1.323	0.16043	1.323	0.03998	1.323	0.04597
2.31231	0.15469	0.21918	0.03876		3.83249	0.03335	0.73288	0.00619		1.33352	0.00619	1.33352	0.16127	1.33352	0.13435	1.33352	0.17181	1.33352	0.05292	1.33352	0.03335
2.3185	0.15388	0.22991	0.0434		3.82193	0.04091	0.72232	0.00933		1.34408	0.00933	1.34408	0.14575	1.34408	0.16194	1.34408	0.16853	1.34408	0.05713	1.34408	0.04091
2.3247	0.15877	0.2346	0.04618		3.81132	0.04856	0.71171	0.00297		1.35469	0.00297	1.35469	0.12105	1.35469	0.22831	1.35469	0.16602	1.35469	0.04512	1.35469	0.04856
2.3309	0.15693	0.2317	0.04278		3.80068	0.03392	0.70107	0.00222		1.36533	0.00222	1.36533	0.11424	1.36533	0.25072	1.36533	0.1828	1.36533	0.03508	1.36533	0.03392
2.3371	0.15104	0.24655	0.04192		3.78999	0.02951	0.69038	0.000330212		1.37602	0.000330212	1.37602	0.10785	1.37602	0.21982	1.37602	0.2104	1.37602	0.03425	1.37602	0.02951
2.3433	0.16409	0.2598	0.04224		3.77926	0.03619	0.67965	0		1.38675	0	1.38675	0.09907	1.38675	0.1707	1.38675	0.19186	1.38675	0.04768	1.38675	0.03619
2.3495	0.17138	0.26301	0.04299		3.76849	0.02956	0.66888	0.000616479		1.39752	0.000616479	1.39752	0.09666	1.39752	0.14313	1.39752	0.1496	1.39752	0.06214	1.39752	0.02956
2.3557	0.17467	0.25836	0.04764		3.75768	0.01887	0.65807	0.000388559		1.40833	0.000388559	1.40833	0.08829	1.40833	0.15486	1.40833	0.16424	1.40833	0.06577	1.40833	0.01887
2.3619	0.18048	0.24621	0.04059		3.74682	0.01558	0.64721	0		1.41919	0	1.41919	0.07537	1.41919	0.19674	1.41919	0.22449	1.41919	0.06162	1.41919	0.01558
2.3681	0.17127	0.24301	0.04791		3.73593	0.0195	0.63632	0		1.43008	0	1.43008	0.07103	1.43008	0.2299	1.43008	0.25457	1.43008	0.04264	1.43008	0.0195
2.3743	0.18462	0.25687	0.04968		3.72499	0.02506	0.62538	0.000779086		1.44102	0.00077909	1.44102	0.06219	1.44102	0.20451	1.44102	0.22437	1.44102	0.03171	1.44102	0.02506
2.3805	0.1869	0.26725	0.04863		3.71401	0.03159	0.6144	0		1.452	0	1.452	0.04532	1.452	0.16988	1.452	0.19755	1.452	0.05606	1.452	0.03159
2.3867	0.18102	0.2546	0.04967		3.70299	0.02894	0.60338	5.47408e-05		1.46302	5.47333e-05	1.46302	0.03936	1.46302	0.17402	1.46302	0.20812	1.46302	0.07418	1.46302	0.02894
2.3929	0.18793	0.2742	0.05033		3.69193	0.01823	0.59232	0.00215		1.47408	0.00215	1.47408	0.03684	1.47408	0.23029	1.47408	0.22649	1.47408	0.06049	1.47408	0.01823
2.39909	0.17848	0.25193	0.04748		3.68082	0.01508	0.58121	0.000622735		1.48519	0.000622791	1.48519	0.02938	1.48519	0.26588	1.48519	0.23915	1.48519	0.05617	1.48519	0.01508
2.40529	0.16935	0.25239	0.05008		3.66968	0.01247	0.57007	0		1.49633	0	1.49633	0.02277	1.49633	0.20553	1.49633	0.23795	1.49633	0.06168	1.49633	0.01247
2.41149	0.18342	0.26833	0.04623		3.65849	0.01401	0.55888	0		1.50752	0	1.50752	0.01492	1.50752	0.15014	1.50752	0.22894	1.50752	0.05325	1.50752	0.01401
2.41769	0.1908	0.28284	0.0501		3.64726	0.02022	0.54765	0		1.51875	0	1.51875	0.0103	1.51875	0.20314	1.51875	0.21963	1.51875	0.04952	1.51875	0.02022
2.42389	0.18726	0.27132	0.05037		3.63599	0.01435	0.53638	0		1.53002	0	1.53002	0.0092	1.53002	0.26056	1.53002	0.22254	1.53002	0.05167	1.53002	0.01435
2.43009	0.19697	0.28342	0.05093		3.62468	0.00632	0.52507	0.000934942		1.54133	0.000948957	1.54133	0.00754	1.54133	0.2411	1.54133	0.23803	1.54133	0.05316	1.54133	0.00632
2.43629	0.18984	0.28253	0.05075		3.61332	0.01163	0.51371	0.00197		1.55269	0.00194	1.55269	0.00745	1.55269	0.19992	1.55269	0.22754	1.55269	0.05463	1.55269	0.01163
2.44249	0.19411	0.2779	0.04313		3.60193	0.01929	0.50232	0		1.56408	0	1.56408	0.00784	1.56408	0.18406	1.56408	0.20343	1.56408	0.04735	1.56408	0.01929
2.44869	0.2	0.26789	0.04888		3.59049	0.0168	0.49088	0		1.57552	0	1.57552	0.00505	1.57552	0.18139	1.57552	0.20872	1.57552	0.04619	1.57552	0.0168
2.45489	0.19137	0.26079	0.04701		3.57901	0.01596	0.4794	0.00117		1.587	0.000783428	1.587	0.000441892	1.587	0.19213	1.587	0.24944	1.587	0.05565	1.587	0.01596
2.46109	0.19553	0.2817	0.0502		3.56749	0.01661	0.46788	0		1.59852	0	1.59852	0	1.59852	0.18784	1.59852	0.26368	1.59852	0.05384	1.59852	0.01661
2.46729	0.19263	0.27471	0.05082		3.55593	0.01522	0.45632	0		1.61008	0	1.61008	0.000415975	1.61008	0.1794	1.61008	0.24517	1.61008	0.04718	1.61008	0.01522
2.47348	0.18592	0.26291	0.05394		3.54432	0.01651	0.44471	0		1.62169	0	1.62169	0.00224	1.62169	0.18379	1.62169	0.23831	1.62169	0.04842	1.62169	0.01651
2.47968	0.1942	0.27596	0.04949		3.53268	0.01465	0.43307	0		1.63333	0	1.63333	0.00297	1.63333	0.17	1.63333	0.24236	1.63333	0.04795	1.63333	0.01465
2.48588	0.18486	0.26791	0.0484		3.52099	0.01382	0.42138	0		1.64502	0	1.64502	0.00139	1.64502	0.17123	1.64502	0.24003	1.64502	0.04909	1.64502	0.01382
2.49208	0.17394	0.27216	0.05002		3.50926	0.01168	0.40965	0		1.65675	0	1.65675	0	1.65675	0.1885	1.65675	0.24789	1.65675	0.05198	1.65675	0.01168
2.49828	0.17218	0.27021	0.05413		3.49749	0.0079	0.39788	0		1.66852	0	1.66852	0	1.66852	0.17641	1.66852	0.26522	1.66852	0.05513	1.66852	0.0079
2.50448	0.17467	0.26493	0.04979		3.48568	0.01472	0.38607	0		1.68033	0	1.68033	0	1.68033	0.15862	1.68033	0.28064	1.68033	0.05658	1.68033	0.01472
2.51068	0.16902	0.26543	0.05225		3.47382	0.01908	0.37421	0.000756763		1.69219	0.000250718	1.69219	0	1.69219	0.16486	1.69219	0.28894	1.69219	0.04791	1.69219	0.01908
2.51688	0.16828	0.25961	0.05704		3.46193	0.01362	0.36232	0		1.70408	0	1.70408	0	1.70408	0.18164	1.70408	0.281	1.70408	0.04485	1.70408	0.01362
2.52308	0.17108	0.26009	0.05273		3.44999	0.01255	0.35038	0		1.71602	0	1.71602	0	1.71602	0.1712	1.71602	0.26572	1.71602	0.05133	1.71602	0.01255
2.52928	0.16234	0.26533	0.05428		3.43801	0.01207	0.3384	0		1.728	0	1.728	0	1.728	0.12997	1.728	0.27122	1.728	0.05617	1.728	0.01207
2.53548	0.17902	0.26308	0.05374		3.42599	0.00619	0.32638	0		1.74002	0	1.74002	0	1.74002	0.109	1.74002	0.29894	1.74002	0.06263	1.74002	0.00619
2.54168	0.16544	0.2529	0.04925		3.41393	0.00875	0.31432	0		1.75208	0	1.75208	0	1.75208	0.12137	1.75208	0.30309	1.75208	0.06092	1.75208	0.00875
2.54788	0.16748	0.24222	0.0527		3.40182	0.01585	0.30221	0		1.76419	0	1.76419	0	1.76419	0.11202	1.76419	0.281	1.76419	0.04453	1.76419	0.01585
2.55407	0.16992	0.25316	0.0497		3.38968	0.01678	0.29007	0		1.77633	0	1.77633	0	1.77633	0.08696	1.77633	0.27688	1.77633	0.03099	1.77633	0.01678
2.56027	0.18362	0.24794	0.04721		3.37749	0.0136	0.27788	0		1.78852	0	1.78852	0	1.78852	0.07757	1.78852	0.29266	1.78852	0.03776	1.78852	0.0136
2.56647	0.16265	0.23755	0.05783		3.36526	0.01115	0.26565	0		1.80075	0	1.80075	0	1.80075	0.07441	1.80075	0.30827	1.80075	0.04321	1.80075	0.01115
2.57267	0.16765	0.23985	0.05087		3.35299	0.0093	0.25338	0		1.81302	0	1.81302	0	1.81302	0.07044	1.81302	0.30982	1.81302	0.04174	1.81302	0.0093
2.57887	0.16956	0.22698	0.04825		3.34068	0.0103	0.24107	0		1.82533	0	1.82533	0	1.82533	0.06671	1.82533	0.30879	1.82533	0.0573	1.82533	0.0103
2.58507	0.17016	0.23242	0.05096		3.32832	0.01166	0.22871	0		1.83769	0	1.83769	0	1.83769	0.06954	1.83769	0.30208	1.83769	0.06046	1.83769	0.01166
2.59127	0.17924	0.24211	0.05275		3.31593	0.0051	0.21632	0.000532961		1.85008	0	1.85008	0	1.85008	0.06581	1.85008	0.28312	1.85008	0.03701	1.85008	0.0051
2.59747	0.16036	0.22211	0.04819		3.30349	0.00252	0.20388	0		1.86252	0	1.86252	0	1.86252	0.04157	1.86252	0.28416	1.86252	0.02187	1.86252	0.00252
2.60367	0.16937	0.22859	0.04665		3.29101	0.01281	0.1914	0		1.875	0	1.875	0	1.875	0.0395	1.875	0.29221	1.875	0.03172	1.875	0.01281
2.60987	0.17836	0.23048	0.04959		3.27849	0.01451	0.17888	0		1.88752	0	1.88752	0	1.88752	0.06778	1.88752	0.2843	1.88752	0.04358	1.88752	0.01451
2.61607	0.17462	0.23296	0.0531		3.26593	0.00745	0.16632	0		1.90008	0	1.90008	0	1.90008	0.05416	1.90008	0.28621	1.90008	0.04253	1.90008	0.00745
2.62227	0.15812	0.23259	0.06014		3.25332	0.00414	0.15371	0		1.91269	0	1.91269	0	1.91269	0.02518	1.91269	0.29762	1.91269	0.03929	1.91269	0.00414
2.62846	0.15764	0.22616	0.05726		3.24068	0.00519	0.14107	0		1.92533	0	1.92533	0	1.92533	0.02079	1.92533	0.30152	1.92533	0.03085	1.92533	0.00519
2.63466	0.17004	0.23172	0.05657		3.22799	0.01394	0.12838	0		1.93802	0	1.93802	0	1.93802	0.01661	1.93802	0.29735	1.93802	0.02792	1.93802	0.01394
2.64086	0.16353	0.23309	0.05922		3.21526	0.01609	0.11565	0		1.95075	0	1.95075	0	1.95075	0.01143	1.95075	0.29942	1.95075	0.04753	1.95075	0.01609
2.64706	0.16654	0.2259	0.06026		3.20249	0.01048	0.10288	0		1.96352	0	1.96352	0	1.96352	0.00708	1.96352	0.30334	1.96352	0.05138	1.96352	0.01048
2.65326	0.16157	0.21794	0.05528		3.18968	0.01084	0.09007	0		1.97633	0	1.97633	0	1.97633	0.00156	1.97633	0.29836	1.97633	0.03856	1.97633	0.01084
2.65946	0.1569	0.2243	0.06424		3.17682	0.01354	0.07721	0		1.98919	0	1.98919	0	1.98919	0.00552	1.98919	0.28956	1.98919	0.04075	1.98919	0.01354
2.66566	0.15818	0.22146	0.07119		3.16393	0.0169	0.06432	0		2.00208	0	2.00208	0	2.00208	0.00922	2.00208	0.28492	2.00208	0.04956	2.00208	0.0169
2.67186	0.15904	0.22516	0.06693		3.15099	0.01509	0.05138	0		2.01502	0	2.01502	0	2.01502	0.00526	2.01502	0.29313	2.01502	0.03888	2.01502	0.01509
2.67806	0.1454	0.21296	0.06516		3.13801	0.00964	0.0384	0		2.028	0	2.028	0	2.028	0.00686	2.028	0.30923	2.028	0.02473	2.028	0.00964
2.68426	0.14378	0.20886	0.06372		3.12499	0.01131	0.02538	0		2.04102	0	2.04102	0	2.04102	0.00715	2.04102	0.30756	2.04102	0.02667	2.04102	0.01131
2.69046	0.14439	0.20443	0.06398		3.11193	0.01658	0.01232	0		2.05408	0	2.05408	0	2.05408	0.00638	2.05408	0.30131	2.05408	0.02386	2.05408	0.01658
2.69666	0.14305	0.21618	0.06631		3.09882	0.01085	-0.0007875	0		2.06719	0	2.06719	0	2.06719	0.00268	2.06719	0.29547	2.06719	0.02687	2.06719	0.01085
2.70286	0.14603	0.20668	0.06854		3.08568	0.00285	-0.01393	0		2.08033	0	2.08033	0	2.08033	0	2.08033	0.29258	2.08033	0.03229	2.08033	0.00285
2.70905	0.13639	0.20466	0.06974		3.07249	0.01149	-0.02712	0		2.09352	0	2.09352	0	2.09352	0.00483	2.09352	0.29198	2.09352	0.00761	2.09352	0.01149
2.71525	0.1331	0.19257	0.06318		3.05926	0.01943	-0.04035	0		2.10675	0	2.10675	0	2.10675	0.00118	2.10675	0.29079	2.10675	0.0077	2.10675	0.01943
2.72145	0.13605	0.19546	0.06865		3.04599	0.01025	-0.05362	0		2.12002	0	2.12002	0	2.12002	0	2.12002	0.28578	2.12002	0.07341	2.12002	0.01025
2.72765	0.13709	0.189	0.0643		3.03268	0.000128107	-0.06693	0		2.13333	0	2.13333	0	2.13333	0	2.13333	0.28268	2.13333	0.07644	2.13333	0.000128107
2.73385	0.12723	0.19198	0.06553		3.01932	0.0073	-0.08029	0		2.14669	0	2.14669	0	2.14669	0.01097	2.14669	0.28412	2.14669	0.02967	2.14669	0.0073
2.74005	0.12863	0.17304	0.06818		3.00593	0.01503	-0.09368	0		2.16008	0	2.16008	0	2.16008	0.0096	2.16008	0.28071	2.16008	0.01475	2.16008	0.01503
2.74625	0.13509	0.18195	0.06418		2.99249	0.00998	-0.10712	0		2.17352	0	2.17352	0	2.17352	0.00171	2.17352	0.26223	2.17352	0.02923	2.17352	0.00998
2.75245	0.12893	0.17165	0.06645		2.97901	0.00708	-0.1206	0		2.187	0	2.187	0	2.187	0	2.187	0.24736	2.187	0.04813	2.187	0.00708
2.75865	0.13413	0.17978	0.0638		2.96549	0.00755	-0.13412	0		2.20052	0	2.20052	0	2.20052	0.000261084	2.20052	0.25255	2.20052	0.04743	2.20052	0.00755
2.76485	0.13151	0.16578	0.06381		2.95193	0.00969	-0.14768	0		2.21408	0	2.21408	0	2.21408	0	2.21408	0.27176	2.21408	0.03595	2.21408	0.00969
2.77105	0.13061	0.1717	0.06744		2.93832	0.01072	-0.16129	0		2.22769	0	2.22769	0	2.22769	0.00235	2.22769	0.28096	2.22769	0.04537	2.22769	0.01072
2.77725	0.1237	0.17239	0.06512		2.92468	0.0097				2.24133	0	2.24133	0	2.24133	0.00789	2.24133	0.27121	2.24133	0.05289	2.24133	0.0097
2.78345	0.11306	0.16633	0.06702		2.91099	0.01054				2.25502	0	2.25502	0	2.25502	0	2.25502	0.24282	2.25502	0.0327	2.25502	0.01054
2.78964	0.11967	0.15287	0.06917		2.89726	0.00931				2.26875	0	2.26875	0	2.26875	0	2.26875	0.22115	2.26875	0.03144	2.26875	0.00931
2.79584	0.12103	0.15747	0.06699		2.88349	0.00886				2.28252	0	2.28252	0	2.28252	0	2.28252	0.21612	2.28252	0.04521	2.28252	0.00886
2.80204	0.12234	0.15434	0.06282		2.86968	0.01239				2.29633	0	2.29633	0	2.29633	0.01151	2.29633	0.21903	2.29633	0.0349	2.29633	0.01239
2.80824	0.10382	0.15685	0.071		2.85582	0.01443				2.31019	0	2.31019	0	2.31019	0.01255	2.31019	0.22298	2.31019	0.0278	2.31019	0.01443
2.81444	0.11628	0.15612	0.0667		2.84193	0.01166				2.32408	0	2.32408	0	2.32408	0.00599	2.32408	0.22199	2.32408	0.03177	2.32408	0.01166
2.82064	0.11347	0.15166	0.07072		2.82799	0.01441				2.33802	0	2.33802	0	2.33802	0.00261	2.33802	0.21529	2.33802	0.03804	2.33802	0.01441
2.82684	0.10769	0.14568	0.06937		2.81401	0.01984				2.352	0	2.352	0	2.352	0.000889187	2.352	0.20777	2.352	0.04709	2.352	0.01984
2.83304	0.10856	0.14635	0.07092		2.79999	0.01681				2.36602	0	2.36602	0	2.36602	0	2.36602	0.19948	2.36602	0.05175	2.36602	0.01681
2.83924	0.10754	0.14881	0.07508		2.78593	0.01367				2.38008	0	2.38008	0	2.38008	0.000826106	2.38008	0.18812	2.38008	0.04916	2.38008	0.01367
2.84544	0.11154	0.14561	0.07704		2.77182	0.01115				2.39419	0	2.39419	0	2.39419	0.00367	2.39419	0.17808	2.39419	0.04633	2.39419	0.01115
2.85164	0.11065	0.1428	0.07295		2.75768	0.00586				2.40833	0	2.40833	0	2.40833	0	2.40833	0.17392	2.40833	0.04616	2.40833	0.00586
2.85784	0.10816	0.14229	0.08001		2.74349	0.00876				2.42252	0	2.42252	0	2.42252	0	2.42252	0.17011	2.42252	0.04642	2.42252	0.00876
2.86403	0.10255	0.14089	0.07392		2.72926	0.01338				2.43675	0	2.43675	0	2.43675	0.00935	2.43675	0.16394	2.43675	0.04305	2.43675	0.01338
2.87023	0.12364	0.14376	0.07792		2.71499	0.01396				2.45102	0	2.45102	0	2.45102	0.00349	2.45102	0.1534	2.45102	0.04434	2.45102	0.01396
2.87643	0.1187	0.13413	0.07964		2.70068	0.01649				2.46533	0	2.46533	0	2.46533	0	2.46533	0.14269	2.46533	0.04682	2.46533	0.01649
2.88263	0.10895	0.1425	0.08905		2.68632	0.02002				2.47969	0	2.47969	0	2.47969	0.00757	2.47969	0.13861	2.47969	0.0515	2.47969	0.02002
2.88883	0.11869	0.13445	0.07911		2.67193	0.01696				2.49408	0	2.49408	0	2.49408	0.00725	2.49408	0.13944	2.49408	0.06137	2.49408	0.01696
2.89503	0.11188	0.13911	0.08494		2.65749	0.00977				2.50852	0	2.50852	0	2.50852	0.00118	2.50852	0.13282	2.50852	0.05871	2.50852	0.00977
2.90123	0.09824	0.1376	0.08632		2.64301	0.00994				2.523	0	2.523	0	2.523	0.00557	2.523	0.12004	2.523	0.04868	2.523	0.00994
2.90743	0.11798	0.14401	0.0912		2.62849	0.01507				2.53752	0	2.53752	0	2.53752	0.00386	2.53752	0.11579	2.53752	0.04579	2.53752	0.01507
2.91363	0.12785	0.14284	0.10007		2.61393	0.0188				2.55208	0	2.55208	0	2.55208	0.00267	2.55208	0.11402	2.55208	0.0559	2.55208	0.0188
2.91983	0.12265	0.1442	0.10061		2.59932	0.01317				2.56669	0	2.56669	0	2.56669	0.01384	2.56669	0.10425	2.56669	0.05962	2.56669	0.01317
2.92603	0.11253	0.14084	0.10214		2.58468	0.00638				2.58133	0	2.58133	0	2.58133	0.01726	2.58133	0.09724	2.58133	0.05355	2.58133	0.00638
2.93223	0.11037	0.14428	0.10471		2.56999	0.00587				2.59602	0	2.59602	0	2.59602	0	2.59602	0.09536	2.59602	0.05314	2.59602	0.00587
2.93843	0.11464	0.13989	0.10821		2.55526	0.00731				2.61075	0	2.61075	0	2.61075	0	2.61075	0.08685	2.61075	0.05566	2.61075	0.00731
2.94462	0.12086	0.13813	0.11172		2.54049	0.01086				2.62552	0	2.62552	0	2.62552	0.00827	2.62552	0.0739	2.62552	0.06834	2.62552	0.01086
2.95082	0.12161	0.13614	0.11392		2.52568	0.01597				2.64033	0	2.64033	0	2.64033	0.01103	2.64033	0.06676	2.64033	0.07207	2.64033	0.01597
2.95702	0.12323	0.13059	0.1134		2.51082	0.01577				2.65519	0	2.65519	0	2.65519	0.00591	2.65519	0.07173	2.65519	0.05769	2.65519	0.01577
2.96322	0.12865	0.13569	0.11305		2.49593	0.01141				2.67008	0	2.67008	0	2.67008	0.000724582	2.67008	0.07237	2.67008	0.06419	2.67008	0.01141
2.96942	0.13185	0.13577	0.12602		2.48099	0.01444				2.68502	0	2.68502	0	2.68502	0.00127	2.68502	0.06034	2.68502	0.08257	2.68502	0.01444
2.97562	0.12906	0.13108	0.12195		2.46601	0.01497				2.7	0	2.7	0	2.7	0.00334	2.7	0.05335	2.7	0.08202	2.7	0.01497
2.98182	0.13894	0.1473	0.13783		2.45099	0.00633				2.71502	0	2.71502	0	2.71502	0.00263	2.71502	0.04946	2.71502	0.06721	2.71502	0.00633
2.98802	0.14129	0.14872	0.14135		2.43593	0.00675				2.73008	0	2.73008	0	2.73008	0.00215	2.73008	0.04123	2.73008	0.06336	2.73008	0.00675
2.99422	0.14723	0.1468	0.13366		2.42082	0.01278				2.74519	0	2.74519	0	2.74519	0.00346	2.74519	0.03552	2.74519	0.08406	2.74519	0.01278
3.00042	0.14453	0.14025	0.1337		2.40568	0.01279				2.76033	0	2.76033	0	2.76033	0.01172	2.76033	0.03207	2.76033	0.10387	2.76033	0.01279
3.00662	0.13562	0.14076	0.13982		2.39049	0.01476				2.77552	0	2.77552	0	2.77552	0.01104	2.77552	0.03234	2.77552	0.10266	2.77552	0.01476
3.01282	0.12693	0.13715	0.13884		2.37526	0.02111				2.79075	0	2.79075	0	2.79075	0	2.79075	0.03512	2.79075	0.096	2.79075	0.02111
3.01902	0.13275	0.12845	0.12835		2.35999	0.02151				2.80602	0	2.80602	0	2.80602	0	2.80602	0.02875	2.80602	0.10301	2.80602	0.02151
3.0376	0.12061	0.1447	0.14625		2.34468	0.01802				2.82133	0	2.82133	0	2.82133	0.01293	2.82133	0.02011	2.82133	0.11988	2.82133	0.01802
3.05	0.12585	0.14307	0.15251		2.32932	0.01286				2.83669	0	2.83669	0	2.83669	0.01188	2.83669	0.01951	2.83669	0.11582	2.83669	0.01286
3.0624	0.11597	0.13917	0.16645		2.31393	0.01044				2.85208	0	2.85208	0	2.85208	0.000580763	2.85208	0.02103	2.85208	0.10659	2.85208	0.01044
3.0748	0.13153	0.14367	0.17107		2.29849	0.01269				2.86752	0	2.86752	0	2.86752	0	2.86752	0.01802	2.86752	0.125	2.86752	0.01269
3.0872	0.12451	0.15601	0.18934		2.28301	0.01451				2.883	0	2.883	0	2.883	0.00802	2.883	0.01145	2.883	0.1423	2.883	0.01451
3.0996	0.12402	0.15321	0.18058		2.26749	0.01785				2.89852	0	2.89852	0	2.89852	0.00683	2.89852	0.01051	2.89852	0.13864	2.89852	0.01785
3.112	0.13859	0.1497	0.18856		2.25193	0.02132				2.91408	0	2.91408	0	2.91408	0	2.91408	0.01522	2.91408	0.12596	2.91408	0.02132
3.1244	0.12959	0.15917	0.20602		2.23632	0.0189				2.92969	0	2.92969	0	2.92969	0.00198	2.92969	0.01417	2.92969	0.12602	2.92969	0.0189
3.1368	0.16381	0.15858	0.21266		2.22068	0.01291				2.94533	0	2.94533	0	2.94533	0.00755	2.94533	0.01322	2.94533	0.1348	2.94533	0.01291
3.1492	0.13506	0.16636	0.22295		2.20499	0.01305				2.96102	0	2.96102	0	2.96102	0.000830827	2.96102	0.01243	2.96102	0.12563	2.96102	0.01305
3.1616	0.12294	0.16249	0.22221		2.18926	0.01799				2.97675	0	2.97675	0	2.97675	0	2.97675	0.00623	2.97675	0.12642	2.97675	0.01799
3.174	0.12378	0.15776	0.23163		2.17349	0.01443				2.99252	0	2.99252	0	2.99252	0.002	2.99252	0.00626	2.99252	0.14104	2.99252	0.01443
3.1864	0.11	0.16165	0.23355		2.15768	0.01021				3.00833	0	3.00833	0	3.00833	0.00234	3.00833	0.012	3.00833	0.14347	3.00833	0.01021
3.1988	0.14181	0.17218	0.25375		2.14182	0.01514				3.02419	0	3.02419	0	3.02419	0.00281	3.02419	0.00954	3.02419	0.14331	3.02419	0.01514
3.2112	0.16041	0.17606	0.24012		2.12593	0.01843				3.04008	0	3.04008	0	3.04008	0.00982	3.04008	0.00467	3.04008	0.15349	3.04008	0.01843
3.2236	0.15879	0.1629	0.24615		2.10999	0.02048				3.05602	0	3.05602	0	3.05602	0.01148	3.05602	0.00848	3.05602	0.16385	3.05602	0.02048
3.236	0.15314	0.16647	0.24638		2.09401	0.02137				3.072	0	3.072	0	3.072	0.00155	3.072	0.01254	3.072	0.16077	3.072	0.02137
3.2484	0.13936	0.16434	0.25008		2.07799	0.02255				3.08802	0	3.08802	0	3.08802	0.00264	3.08802	0.01068	3.08802	0.14266	3.08802	0.02255
3.2608	0.13188	0.16908	0.25668		2.06193	0.02637				3.10408	0	3.10408	0	3.10408	0.01728	3.10408	0.00784	3.10408	0.1295	3.10408	0.02637
3.2732	0.12571	0.17072	0.27615		2.04582	0.02775				3.12019	0	3.12019	0	3.12019	0.01284	3.12019	0.00994	3.12019	0.13524	3.12019	0.02775
3.2856	0.14248	0.17416	0.27002		2.02968	0.02124				3.13633	0	3.13633	0	3.13633	0	3.13633	0.01444	3.13633	0.14992	3.13633	0.02124
3.298	0.156	0.19175	0.28007		2.01349	0.01817				3.15252	0	3.15252	0	3.15252	0.00284	3.15252	0.0127	3.15252	0.15796	3.15252	0.01817
3.3104	0.16535	0.19241	0.30146		1.99726	0.02673				3.16875	0	3.16875	0	3.16875	0.01668	3.16875	0.01205	3.16875	0.15348	3.16875	0.02673
3.3228	0.24144	0.2216	0.33826		1.98099	0.03334				3.18502	0	3.18502	0	3.18502	0.00829	3.18502	0.01443	3.18502	0.14201	3.18502	0.03334
3.3352	0.25098	0.2402	0.36874		1.96468	0.03573				3.20133	0	3.20133	0	3.20133	0	3.20133	0.01214	3.20133	0.13224	3.20133	0.03573
3.3476	0.25263	0.25329	0.38499		1.94832	0.04058				3.21769	0	3.21769	0	3.21769	0.01217	3.21769	0.00805	3.21769	0.13012	3.21769	0.04058
3.36	0.21948	0.25075	0.39595		1.93193	0.04417				3.23408	0	3.23408	0	3.23408	0.02152	3.23408	0.00923	3.23408	0.12709	3.23408	0.04417
3.3724	0.23882	0.25546	0.39851		1.91549	0.0356				3.25052	0	3.25052	0	3.25052	0.01815	3.25052	0.01575	3.25052	0.11826	3.25052	0.0356
3.3848	0.28045	0.2542	0.40584		1.89901	0.02986				3.267	0	3.267	0	3.267	0.01415	3.267	0.01861	3.267	0.10856	3.267	0.02986
3.3972	0.27904	0.26784	0.3909		1.88249	0.03753				3.28352	0	3.28352	0	3.28352	0.01163	3.28352	0.01296	3.28352	0.09627	3.28352	0.03753
3.4096	0.28714	0.27297	0.41723		1.86593	0.04351				3.30008	0	3.30008	0	3.30008	0.01497	3.30008	0.00992	3.30008	0.08865	3.30008	0.04351
3.422	0.27605	0.29048	0.4278		1.84932	0.04373				3.31669	0	3.31669	0	3.31669	0.01815	3.31669	0.01239	3.31669	0.08594	3.31669	0.04373
3.4344	0.2662	0.27367	0.43229		1.83268	0.04589				3.33333	0	3.33333	0	3.33333	0.01093	3.33333	0.01408	3.33333	0.08061	3.33333	0.04589
3.4468	0.25331	0.25458	0.3991		1.81599	0.04099				3.35002	0	3.35002	0	3.35002	0.01125	3.35002	0.01255	3.35002	0.069	3.35002	0.04099
3.4592	0.29196	0.26661	0.40275		1.79926	0.0392				3.36675	0	3.36675	0	3.36675	0.01659	3.36675	0.01169	3.36675	0.05836	3.36675	0.0392
3.4716	0.26677	0.2686	0.41219		1.78249	0.05015				3.38352	0	3.38352	0	3.38352	0.01333	3.38352	0.01107	3.38352	0.0563	3.38352	0.05015
3.484	0.31	0.26993	0.39843		1.76568	0.05175				3.40033	0	3.40033	0	3.40033	0.01219	3.40033	0.00708	3.40033	0.05397	3.40033	0.05175
3.5088	0.39812	0.2836	0.42882		1.74882	0.04183				3.41719	0	3.41719	0	3.41719	0.01354	3.41719	0.00656	3.41719	0.04526	3.41719	0.04183
3.5212	0.3991	0.33824	0.49324		1.73193	0.03432				3.43408	0	3.43408	0	3.43408	0.01122	3.43408	0.00855	3.43408	0.03857	3.43408	0.03432
3.5335	0.42982	0.33999	0.48937		1.71499	0.03662				3.45102	0	3.45102	0	3.45102	0.00669	3.45102	0.0079	3.45102	0.03385	3.45102	0.03662
3.5459	0.43609	0.36439	0.51066		1.69801	0.0411				3.468	0	3.468	0	3.468	0.00535	3.468	0.00932	3.468	0.02573	3.468	0.0411
3.5583	0.54431	0.37345	0.54362		1.68099	0.03717				3.48502	0	3.48502	0	3.48502	0.00752	3.48502	0.0075	3.48502	0.01902	3.48502	0.03717
3.5707	0.61283	0.44071	0.65152		1.66393					3.50208	0	3.50208	0	3.50208	0.00562	3.50208	0.00174	3.50208	0.01916	3.50208	0.03009
3.5831	0.55418	0.42058	0.60726		1.64682					3.51919	0	3.51919	0	3.51919	0.00334	3.51919	0.00955	3.51919	0.01984	3.51919	0.02947
3.5955	0.59745	0.42826	0.63994		1.62968					3.53633	0	3.53633	0	3.53633	4.53337e-49	3.53633	0.01443	3.53633	0.01496	3.53633	0.02628
3.6079	0.60903	0.47034	0.67335		1.61249					--	--	--	--	3.55352	0.00401	3.55352	0.0068	3.55352	0.01128	3.55352	0.02358
3.6203	0.59895	0.50661	0.73559		1.59526					--	--	--	--	3.57075	0.00494	3.57075	0.0068	3.57075	0.01046	3.57075	0.02557
3.6327	0.74523	0.56885	0.77851		1.57799					--	--	--	--	3.58802	0.0042	3.58802	0.00685	3.58802	0.00828	3.58802	0.01882
3.6451	0.808	0.5968	0.79109		1.56068					--	--	--	--	3.60533	0.00318	3.60533	0.00445	3.60533	0.00584	3.60533	0.02528
3.6575	0.7959	0.68041	0.86402		1.54332					--	--	--	--	3.62269	0.000336867	3.62269	0.0064	3.62269	0.00486	3.62269	0.04008
3.6699	0.74018	0.63472	0.82855		1.52593					--	--	--	--	3.64008	0.000857161	3.64008	0.00703	3.64008	0.00569	3.64008	0.03423
3.6823	0.84114	0.67551	0.91195		1.50849							--	--	3.65752	0.00501	3.65752	0.00699	3.65752	0.00609	3.65752	0.02848
3.6947	0.88108	0.75747	0.94781		1.49101							--	--	3.675	0.0042	3.675	0.00655	3.675	0.00432	3.675	0.02886
3.7071	0.92579	0.7747	0.9645		1.47349							--	--	3.69252	0.000495226	3.69252	0.00667	3.69252	0.00202	3.69252	0.02399
3.7195	0.92721	0.77674	0.95229		1.45593							--	--	3.71008	0.00205	3.71008	0.00802	3.71008	0.00214	3.71008	0.0221
3.7319	0.85214	0.78884	1		1.43832							--	--	3.72769	0.00472	3.72769	0.00679	3.72769	0.00276	3.72769	0.02452
3.7443	0.825	0.77648	0.95654		1.42068							--	--	3.74533	0.00372	3.74533	0.0051	3.74533	0.00151	3.74533	0.02167
3.7567	0.85974	0.78243	0.93243		1.40299							--	--	3.76302	0.00119	3.76302	0.00541	3.76302	0.000723011	3.76302	0.02053
3.7691	0.8743	0.83046	0.94865		1.38526							--	--	3.78075	0.000934997	3.78075	0.00506	3.78075	0.00116	3.78075	0.02527
3.7815	0.94964	0.89058	0.98434		1.36749							--	--	3.79852	0.0023	3.79852	0.00526	3.79852	0.00126	3.79852	0.0213
3.7939	0.95888	0.91287	0.9855		1.34968							--	--	3.81633	0.0028	3.81633	0.00536	3.81633	0.000769894	3.81633	0.01525
3.8063	0.94901	0.88992	0.97322		1.33182							--	--	3.83419	0.00319	3.83419	0.00352	3.83419	0	3.83419	0.01889
3.8187	0.94401	0.96577	0.99837		1.31393									3.85208	0.00269	3.85208	0.00368	3.85208	0.000264414	3.85208	0.02063
3.8311	0.99147	0.94171	0.9352		1.29599									3.87002	0.00244	3.87002	0.0053	3.87002	0.00124	3.87002	0.01621
3.8435	0.95436	1	0.95924		1.27801									3.888	0.00191	3.888	0.00538	3.888	0.000939826	3.888	0.01411
3.8559	0.91277	0.94166	0.9373		1.25999									3.90602	0.00291	3.90602	0.00301	3.90602	0.000338399	3.90602	0.01314
3.8683	0.97306	0.96223	0.93014		1.24193									3.92408	0.00282	3.92408	0.00347	3.92408	0	3.92408	0.01118
3.8807	1	0.98919	0.93506		1.22382									3.94219	0	3.94219	0.00296	3.94219	1.66312e-05	3.94219	0.01239
3.8931	0.91577	0.96562	0.8502		1.20568									3.96033	0.000530498	3.96033	0	3.96033	0.00133	3.96033	0.01307
3.9055	0.94729	0.90741	0.81565		1.18749									3.97852	0.00368	3.97852	0.00144	3.97852	0.000675522	3.97852	0.01026
3.9179	0.90098	0.9396	0.79623		1.16926									3.99675	0.00225	3.99675	0.00828	3.99675	0	3.99675	0.00922
3.9303	0.8596	0.87124	0.75565		1.15099									4.01502	0.000503274	4.01502	0.00675	4.01502	0.000155266	4.01502	0.01026
3.9427	0.77736	0.85126	0.68991		1.13268									4.03333	0.00105	4.03333	0.000582786	4.03333	0.000149143	4.03333	0.00954
3.9551	0.80369	0.76242	0.65456		1.11432									4.05169	0.00109	4.05169	0.00299	4.05169	2.0835e-05	4.05169	0.00771
3.9675	0.77405	0.78019	0.65167		1.09593									4.07008	3.47999e-39	4.07008	0.00765	4.07008	0	4.07008	0.00665
3.9799	0.70042	0.70509	0.62501		1.07749											4.08852	0.00499	4.08852	0.00010054	4.08852	0.00649
3.9923	0.68142	0.67285	0.56431		1.05901											4.107	7.28673e-50	4.107	0.000664	4.107	0.00601
4.0047	0.65854	0.67052	0.52695		1.04049													4.12552	0.000734325	4.12552	0.00466
4.0171	0.56208	0.66131	0.49805		1.02193													4.14408	0	4.14408	0.00337
4.0295	0.68181	0.64761	0.46503		1.00332													4.16269	0.000234031	4.16269	0.0046
4.0419	0.60404	0.6378	0.45615		0.98468													4.18133	0.00105	4.18133	0.00584
4.0543	0.66315	0.70021	0.48338		0.96599													4.20002	0.000500096	4.20002	0.00375
4.0667	0.6545	0.68218	0.45734		0.94726													4.21875	0.000523364	4.21875	0.00309
4.0791	0.6687	0.62208	0.42319		0.92849													4.23752	0.000232248	4.23752	0.00478
4.0915	0.71331	0.66975	0.41506		0.90968													4.25633	0	4.25633	0.00354
4.1039	0.73576	0.68494	0.40589		0.89082													4.27519	0.000391755	4.27519	0.00193
4.1163	0.69343	0.65516	0.38631		0.87193													4.29408	0.00139	4.29408	0.00193
4.1287	0.57741	0.5609	0.34085		0.85299													4.31302	0.000429935	4.31302	0.00247
4.1411	0.51632	0.58213	0.32439		0.83401													4.332	0	4.332	0.00608
4.1535	0.61396	0.54388	0.33126		0.81499													4.35102	5.20533e-06	4.35102	0.00706
4.1659	0.50836	0.44911	0.2676		0.79593													4.37008	0.000631702	4.37008	0.00159
4.1783	0.5149	0.39175	0.2329		0.77682													4.38919	2.21628e-05	4.38919	0
4.1907	0.49412	0.40894	0.23207		0.75768													4.40833	0.000582531	4.40833	0.00088134
4.2031	0.46455	0.35814	0.22702		0.73849													4.42752	0.00113	4.42752	0.000976045
4.2155	0.40161	0.35835	0.20768		0.71926													4.44675	0.000514364	4.44675	0.000286644
4.2279	0.39089	0.41163	0.23204		0.69999													4.46602	0	4.46602	0.0014
4.2403	0.40352	0.42599	0.22926		0.68068													4.48533	8.8566e-50	4.48533	7.74567e-50
4.2527	0.45279	0.4263	0.21427
4.2651	0.3665	0.42692	0.20575
4.2775	0.39552	0.4312	0.21181
4.2899	0.38963	0.43047	0.19622
4.3023	0.44701	0.40397	0.19499
4.3147	0.46227	0.47984	0.20803
4.327	0.42346	0.46044	0.19772
4.3394	0.45372	0.44362	0.18597
4.3518	0.5293	0.49547	0.19559
4.3642	0.44109	0.44092	0.17094
4.3766	0.42191	0.41299	0.16831
4.389	0.43548	0.45156	0.17501
4.4014	0.39262	0.42042	0.16025
4.4138	0.39416	0.40177	0.16903
4.4262	0.36419	0.40616	0.16144
4.4386	0.45632	0.42673	0.15071
4.451	0.43915	0.37176	0.14091
4.4634	0.4609	0.38494	0.14455
4.4758	0.35428	0.39793	0.14617
4.4882	0.36798	0.35436	0.13521
4.5006	0.38416	0.3456	0.11784
4.513	0.34282	0.37842	0.12238
4.5254	0.45538	0.38527	0.12179
4.5378	0.3853	0.38267	0.11507
4.5502	0.4586	0.4149	0.11395
4.5626	0.31513	0.40289	0.11162
4.575	0.34113	0.37337	0.09899
4.5874	0.40439	0.38707	0.09227
4.5998	0.31018	0.34731	0.09894
4.6122	0.32069	0.3353	0.08757
4.6246	0.30843	0.33784	0.07648
4.637	0.22807	0.29915	0.06721
4.6494	0.29968	0.28893	0.05966
4.6618	0.17666	0.27129	0.05397
4.6742	0.18026	0.28129	0.0563
4.6866	0.21673	0.29193	0.04971
4.699	0.26091	0.25391	0.05631
4.7114	0.26427	0.28213	0.04917
4.7238	0.32008	0.27715	0.05576
4.7362	0.30326	0.24903	0.05096
4.7486	0.27626	0.23655	0.04552
4.761	0.27836	0.23912	0.03545
4.7734	0.27385	0.22437	0.03331
4.7858	0.27301	0.20336	0.03273
4.7982	0.19074	0.22464	0.04119
4.8106	0.2199	0.22218	0.03632
4.823	0.2783	0.21275	0.02849
4.8354	0.22241	0.22441	0.01929
4.8478	0.1638	0.20495	0.03182
4.8602	0.18366	0.19988	0.02177
4.8726	0.19031	0.17606	0.01776
4.885	0.17153	0.15303	0.02334
4.8974	0.16094	0.1706	0.02168
4.9098	0.19375	0.16446	0.01102
4.9222	0.17146	0.14398	0.00629
4.9346	0.1299	0.13676	0.01443
4.947	0.24665	0.22926	0.01504
4.9594	0.13157	0.23667	0.01951
4.9718	0.13967	0.20016	0.01494
4.9842	0.10113	0.18906	0.01289
4.9966	0.04625	0.17559	0.01069
5.009	0.02317	0.2061	0.00808
5.0214	0.02958	0.21605	0.01347
5.0338	0.02676	0.20164	0.00892
5.0462	0.07184	0.20226	0.00856
5.0586	0.08316	0.19427	0.01379
5.071	0.0449	0.20588	0.00398
5.0834	0.0293	0.18842	0.00728
5.0958	0.0759	0.18772	0.01049
5.1081	0.07586	0.19864	0.00919
5.1205	0.04352	0.17561	0.01309
5.1329	0.09835	0.16249	0.00186
5.1453	0.02376	0.16844	0.0027
5.1577	0	0.1759	0.01005
5.1701	0.0496	0.17401	0.00878
5.1825	0.0871	0.18774	0.00578
5.1949	0.08771	0.18352	0.00739
5.2073	0.10589	0.18418	-0.000605321
5.2197	0.04718	0.18945	0.0054
5.2321	0.10589	0.18211	0.00942
5.2445	0.11828	0.20978	0.0088
5.2569	0.17751	0.24967	0.01606
5.2693	0.21357	0.29926	0.01196
5.2817	0.25458	0.29462	0.01151
5.2941	0.28802	0.28939	0.00626
5.3065	0.27543	0.25377	0.00659
5.3189	0.19746	0.24341	0.00705
5.3313	0.20769	0.23001	0.00749
5.3437	0.24892	0.20398	0.00797
5.3561	0.25335	0.18824	0.000532265
5.3685	0.19155	0.18205	0.00684
5.3809	0.27418	0.18502	0.00432
5.3933	0.16181	0.19606	0.00486
5.4057	0.19293	0.19011	0.0047
5.4181	0.15027	0.1904	-0.000330491
5.4305	0.16787	0.16301	0.00564
5.4429	0.22223	0.16042	0.00122
5.4553	0.25528	0.16091	-0.00515
5.4677	0.26871	0.16526	-0.00292
5.4801	0.17885	0.17641	0.00129
5.4925	0.21239	0.17669	-0.00234
5.5049	0.22201	0.15341	0.000914939
5.5173	0.15738	0.14065	-0.00388
5.5297	0.10432	0.13598	-0.00273
5.5421	0.17225	0.14652	-0.00405
5.5545	0.17512	0.15649	-0.00489
5.5669	0.22859	0.17837	-0.00222
5.5793	0.19409	0.16845	0.000939291
5.5917	0.13682	0.15213	0.000685334
5.6041	0.22001	0.1116	-0.00489
5.6165	0.20886	0.11346	0.0016
5.6289	0.18192	0.11616	-0.00225
5.6413	0.14749	0.09952	0.00103
5.6537	0.13987	0.08552	-0.00336
5.6661	0.16126	0.07226	0.00412
5.6785	0.1433	0.06586	0.00462
5.6909	0.11008	0.08843	-0.00277
5.7033	0.12491	0.10767	-0.00673
5.7157	0.10836	0.06948	-0.00478
5.7281	0.17077	0.07286	-0.00625
5.7405	0.11933	0.07164	-0.00489
5.7529	0.12536	0.08658	-0.00604

## Sheet: Figure 2
Figure 2a
Pump-probe delay (ps)	Fragment depletion by probe (a.u.)
-5.3	-12.3794
-4.8	-12.344
-4.3	-12.367
-3.8	-12.3592
-3.3	-12.3607
-2.8	-12.3963
-2.3	-12.398
-1.8	-12.3294
-1.3	-12.3968
-0.8	-12.4102
-0.3	-12.2965
-0.27	-12.2801
-0.24	-12.1754
-0.21	-12.1101
-0.18	-11.9933
-0.15	-11.8589
-0.12	-11.9287
-0.09	-11.9228
-0.06	-11.881
-0.03	-11.8514
0	-11.8734
0.03	-11.8892
0.06	-11.8058
0.09	-11.8842
0.12	-11.8517
0.15	-11.9125
0.18	-11.8943
0.21	-11.9267
0.24	-11.9716
0.27	-12.0073
0.3	-11.9449
0.33	-11.9566
0.36	-12.0189
0.39	-12.0235
0.42	-12.0105
0.45	-12.0145
0.95	-12.0793
1.45	-12.1008
1.95	-12.1618
2.45	-12.116
2.95	-12.084
3.45	-12.1439
3.95	-12.016
4.45	-12.1198
4.95	-12.0599
5.45	-12.1543
5.95	-12.108
6.45	-12.1064
6.95	-12.1285
7.45	-12.1826
7.95	-12.1079
8.45	-12.1415
8.95	-12.1675
9.45	-12.1686
9.95	-12.1408
10.45	-12.1299
10.95	-12.1445
11.45	-12.1816
11.95	-12.1271
12.45	-12.1652
12.95	-12.1061
13.45	-12.1399
13.95	-12.1873
14.45	-12.1582
14.95	-12.167
15.45	-12.1928
15.95	-12.1742
16.45	-12.2182
16.95	-12.2326
17.45	-12.0821
17.95	-12.0812
18.45	-12.1292
18.95	-12.217
19.45	-12.1733
19.95	-12.1714
20.45	-12.1534
20.95	-12.1169
21.45	-12.1715
21.95	-12.2239
22.45	-12.1515
22.95	-12.178
23.45	-12.2356
23.95	-12.1845
24.45	-12.2149
24.95	-12.2139
25.45	-12.2639
25.95	-12.126
26.45	-12.2477
26.95	-12.1798
27.45	-12.2709
27.95	-12.187
28.45	-12.3276
28.95	-12.2797
29.45	-12.2219
29.95	-12.2318
30.45	-12.2363
33.45	-12.3179
36.45	-12.2872
39.45	-12.3138
42.45	-12.3918
45.45	-12.3441
48.45	-12.4333
51.45	-12.4108
54.45	-12.5394
57.45	-12.4783
60.45	-12.5753
63.45	-12.6001
66.45	-12.6151
69.45	-12.587
72.45	-12.5749
75.45	-12.6113
100.45	-12.8379
125.45	-12.9682
150.45	-13.1706
175.45	-13.294
200.45	-13.3879
225.45	-13.4883
250.45	-13.6044
275.45	-13.6662
300.45	-13.7294
325.45	-13.8144
350.45	-13.9487
375.45	-13.9559
400.45	-14.1088
425.45	-14.0809
450.45	-14.0643
475.45	-14.2198
500.45	-14.233
525.45	-14.315
550.45	-14.3413
575.45	-14.297
600.45	-14.3735
625.45	-14.3512
650.45	-14.3712
675.45	-14.4793

## Sheet: Figure 3
Figure 3a							Figure 3b					Figure 3c			Figure 3d
Photon energy (eV)	Parent depletion (a.u.)	Photoelectron (a.u.)	Photon energy (eV)	NO2- (a.u.)	C6H5NO2 (a.u.)		Photon energy (eV)	Parent depletion (a.u.)	Photoelectron (a.u.)	C6H5NO2 (a.u.)		Pump-probe delay (ps)	Fragment depletion by probe (a.u.)		Pump-probe delay (ps)	Fragment depletion by probe (a.u.)
0.99807	0.01432	-5.37939e-05	0.6323	0.00127	0.00172		0.7563	0.00352	0.000567313	0.00309		-5.3	-19.6011		-5.2	-0.83023
1.00427	0.00713	-5.11834e-05	0.6447	0.00146	-0.000612055		0.7687	0.00647	0.000372477	-0.00445		-4.8	-19.6009		-4.6	-1
1.01047	0.00557	-3.46471e-05	0.6571	-0.000347877	-0.000708893		0.7811	0.00921	0.000369797	-0.00603		-4.3	-19.8235		-4	-0.80656
1.01667	0.00488	-8.27528e-05	0.6695	0.00151	-0.000361067		0.7935	0.00581	0.000363406	-0.00417		-3.8	-19.5932		-3.4	-0.79216
1.02287	0.00825	-9.03302e-05	0.6819	0.00152	-0.000586364		0.8059	0.00828	0.000359255	-0.00024		-3.3	-19.4378		-2.8	-0.66996
1.02907	0	-7.66786e-05	0.6943	0.0012	-0.000467787		0.8183	0.01282	0.000356293	-0.0002		-2.8	-19.5169		-2.2	-0.78659
1.03527	0.01151	-9.01575e-05	0.7067	3.40826e-05	-0.000774111		0.8307	0.00715	0.000363194	-0.00155		-2.3	-19.6734		-1.6	-0.78151
1.04147	0.0087	-3.93703e-05	0.7191	0.0023	3.02372e-05		0.8431	0.00819	0.000358438	0.0055		-1.8	-19.5017		-1	-0.72852
1.04767	0.01887	-5.79279e-05	0.7315	0.00123	-4.88142e-05		0.8555	0.00455	0.000361683	0.00095		-1.3	-19.7213		-0.4	-0.71629
1.05387	0.01132	7.92281e-07	0.7439	-0.000553548	-0.000914427		0.8679	0.00718	0.000370511	-0.0047		-0.8	-19.4988		-0.34	-0.68775
1.06006	0.01453	4.00204e-06	0.7563	0.000386661	-0.00101		0.8803	0.01063	0.000371246	-0.00095		-0.3	-19.4224		-0.28	-0.64186
1.06626	0.01711	-2.61859e-05	0.7687	-2.46805e-05	-0.000489526		0.8927	0.0062	0.00037741	0.00163		-0.26	-19.3469		-0.22	-0.64855
1.07246	0.01269	-4.77806e-05	0.7811	-0.00165	-0.000639723		0.9051	0.00786	0.000372885	0.00566		-0.22	-19.1678		-0.16	-0.62533
1.07866	0.0145	-8.4449e-05	0.7935	-0.0005653	-0.000384783		0.9175	0.00597	0.000380131	-0.00158		-0.18	-18.7862		-0.1	-0.3626
1.08486	0.01675	-4.69985e-05	0.8059	0.000416042	1.04743e-05		0.9299	0.00451	0.000390094	-0.00295		-0.14	-18.4152		-0.04	-0.21905
1.09106	0.01177	-5.95836e-05	0.8183	-0.000153959	-0.000422332		0.9423	0.00268	0.000393424	-0.00219		-0.1	-18.1172		0.02	-0.12861
1.09726	0.01364	-4.06298e-05	0.8307	-7.75672e-05	-0.000424308		0.9547	0	0.000393464	0.00212		-0.06	-18.4202		0.08	-0.2074
1.10346	0.00934	-5.52261e-05	0.8431	-0.00132	-0.000485573		0.9671	0.00748	0.000373103	0.00019		-0.02	-18.1458		0.14	-0.2533
1.10966	0.01954	-6.98325e-05	0.8555	-0.000718084	-0.000343281		0.9795	0.00829	0.000367565	0.00126		0.02	-18.1432		0.2	-0.28473
1.11586	0.0164	-4.56273e-05	0.8679	-0.00051829	0.000399802		0.9919	0.00896	0.000364705	0.00494		0.06	-18.2914		0.26	-0.35822
1.12206	0.01318	-6.87659e-05	0.8803	-0.000324372	0.000251581		1.0043	0.00687	0.000375469	0.00203		0.1	-18.3052		0.32	-0.32855
1.12826	0.01833	-5.70646e-05	0.8927	0.000316145	0.000142885		1.0167	0.01015	0.000365216	-0.00153		0.14	-18.2805		0.38	-0.41343
1.13446	0.01507	-3.11021e-05	0.9051	0.00153	0.000484783		1.0291	0.0103	0.000368775	0.00077		0.18	-18.2615		0.44	-0.43612
1.14065	0.01305	-7.24937e-05	0.9175	-0.00106	6.77866e-05		1.0415	0.01042	0.000373159	0.00248		0.22	-18.3743		0.5	-0.35614
1.14685	0.01057	-4.22245e-05	0.9299	-0.00035963	0.000662648		1.0539	0.01004	0.000365223	7e-05		0.26	-18.4297		0.56	-0.56837
1.15305	0.02029	-5.30117e-05	0.9423	-9.51961e-05	0.000530237		1.0663	0.01119	0.000368025	-0.00218		0.3	-18.3398		0.62	-0.51588
1.15925	0.00788	-4.13611e-05	0.9547	-0.00124	-5.47431e-05		1.0787	0.00929	0.000375448	0.00263		0.34	-18.3217		0.68	-0.63699
1.16545	0.01358	-4.15541e-05	0.9671	-0.000641692	-3.49802e-05		1.0911	0.01244	0.000353104	-0.0005		0.38	-18.405		0.74	-0.52451
1.17165	0.00433	-3.23413e-05	0.9795	-0.000224475	0.0002417		1.1035	0.01042	0.000354213	-0.00434		0.42	-18.5874		0.8	-0.56977
1.17785	0.01525	-3.54698e-05	0.9919	-0.000988394	-5.27668e-05		1.1159	0.01356	0.00034966	-0.00491		0.46	-18.4787		0.86	-0.60856
1.18405	0.01157	-5.88523e-05	1.0043	-0.000124578	0.000830632		1.1283	0.0103	0.000347754	-0.00042		0.5	-18.3557		0.92	-0.72443
1.19025	0.00739	-8.04673e-05	1.0167	0.0027	0.00145		1.1407	0.01387	0.000350295	-0.00158		0.54	-18.3518		0.98	-0.57893
1.19645	0.0143	-3.86999e-05	1.0291	0.00197	0.000631028		1.1531	0.01377	0.000346071	-0.00272		0.58	-18.3984		1.04	-0.5999
1.20265	0.01116	-0.000104347	1.0415	0.000868518	6.77866e-05		1.1655	0.01533	0.000349763	0.00011		0.62	-18.4278		1.1	-0.65283
1.20885	0.01417	-5.43322e-05	1.0539	0.000886147	0.000318775		1.1778	0.01642	0.000342389	0.00304		0.66	-18.5014		1.16	-0.76612
1.21505	0.01581	-1.77349e-05	1.0663	-0.000782724	0.000972925		1.1902	0.01446	0.000346268	0.00267		0.7	-18.4622		1.22	-0.75752
1.22124	0.01567	-6.37888e-05	1.0787	-0.00211	0.000198221		1.2026	0.01183	0.000343256	0.00198		0.74	-18.5106		1.28	-0.686
1.22744	0.01609	-5.91875e-05	1.0911	-0.000224475	0.00098083		1.215	0.01114	0.000342254	0.00593		0.78	-18.6025		1.34	-0.61898
1.23364	0.0178	-7.39767e-05	1.1035	-0.00132	0.00104		1.2274	0.00919	0.000355619	0.00572		0.82	-18.4324		1.4	-0.62331
1.23984	0.0257	-4.57695e-05	1.1159	-0.00172	0.000512451		1.2398	0.01292	0.00035131	0.00602		0.86	-18.4926		1.46	-0.67954
1.24604	0.0166	-3.69731e-05	1.1283	0.0012	0.000878063		1.2522	0.01256	0.00035352	0.01953		0.9	-18.6279		1.52	-0.68606
1.25224	0.0167	-6.22245e-05	1.1407	-0.000183341	0.00256		1.2646	0.01009	0.000365582	0.01372		0.94	-18.572		1.58	-0.68758
1.25844	0.02338	-2.74048e-05	1.1531	0.00175	0.00196		1.277	0.00835	0.000359187	0.01971		0.98	-18.5877		1.64	-0.65543
1.26464	0.01904	-3.62723e-05	1.1655	0.00269	0.00184		1.2894	0.01001	0.000352409	0.01851		1.02	-18.5608		1.7	-0.59283
1.27084	0.01769	-3.31742e-05	1.1778	0.00245	0.00161		1.3018	0.01046	0.000351148	0.02087		1.06	-18.6869		2.2	-0.69758
1.27704	0.01688	-3.69325e-05	1.1902	-0.000142207	0.000816798		1.3142	0.01217	0.000356305	0.0142		1.1	-18.6595		2.7	-0.56625
1.28324	0.01587	-2.40935e-05	1.2026	0.000897899	0.00171		1.3266	0.01215	0.000361606	0.02155		1.14	-18.669		3.2	-0.70758
1.28944	0.01648	1.51955e-05	1.215	-0.000412517	0.00104		1.339	0.00728	0.000363846	0.02601		1.18	-18.6705		3.7	-0.69733
1.29563	0.02062	-4.73236e-05	1.2274	0.000310269	0.000797036		1.3514	0.00938	0.000367527	0.02761		1.22	-18.6315		4.2	-0.61996
1.30183	0.02009	-6.82581e-06	1.2398	0.000486558	0.00174		1.3638	0.00847	0.000369341	0.031		1.26	-18.6034		4.7	-0.68897
1.30803	0.01575	-8.29559e-05	1.2522	-0.00112	0.000291107		1.3762	0.0063	0.000381029	0.02752		1.3	-18.6061		5.2	-0.74103
1.31423	0.01806	-7.30727e-05	1.2646	-0.00139	0.0012		1.3886	0.0053	0.000380531	0.03957		1.34	-18.6169		5.7	-0.74825
1.32043	0.01964	-1.78771e-05	1.277	-0.00035963	0.000743676		1.401	0.00415	0.000394612	0.03368		1.38	-18.5749		6.2	-0.69442
1.32663	0.02056	-2.52921e-05	1.2894	-0.000864992	0.000146838		1.4134	0.00411	0.000381074	0.03303		1.42	-18.6233		6.7	-0.68598
1.33283	0.01455	-7.19859e-05	1.3018	-0.000723961	0.00178		1.4258	0.0061	0.000389459	0.0371		1.46	-18.5604		7.2	-0.82676
1.33903	0.01741	-9.9543e-06	1.3142	-0.00124	0.000463043		1.4382	0.00518	0.000382369	0.03822		1.5	-18.6774		7.7	-0.6611
1.34523	0.01199	-5.42509e-05	1.3266	0.0011	0.00114		1.4506	0.00275	0.000382835	0.04398		2.2	-18.7892		8.2	-0.61305
1.35143	0.00982	-6.51499e-05	1.339	0.000586455	0.00102		1.463	0.00673	0.000390626	0.04412		2.9	-18.9857		8.7	-0.64607
1.35763	0.00875	-7.61809e-05	1.3514	0.00132	0.000271344		1.4754	0.0116	0.000374728	0.04404		3.6	-18.9302		9.2	-0.82111
1.36383	0.01085	-6.55867e-05	1.3638	-0.000723961	0.000520356		1.4878	0.00913	0.000374777	0.04549		4.3	-19.0416		12.2	-0.59087
1.37003	0.01113	-8.0447e-05	1.3762	-0.00112	0.00056581		1.5002	0.00614	0.000374505	0.04303		5	-18.9539		15.2	-0.67359
1.37622	0.01031	-3.09091e-05	1.3886	-0.00106	0.000771344		1.5126	0.01138	0.000377887	0.04424		5.7	-18.9781		18.2	-0.59125
1.38242	0.00493	-2.59929e-05	1.401	3.40826e-05	-9.28854e-06		1.525	0.00762	0.000379996	0.04629		6.4	-18.8547		21.2	-0.69275
1.38862	0.01238	-8.43068e-06	1.4134	-0.000394888	0.000263439		1.5374	0.00222	0.000382762	0.04981		7.1	-18.8612		24.2	-0.67552
1.39482	0.01126	-7.64856e-05	1.4258	-0.000582929	0.000474901		1.5498	0.01117	0.000366413	0.05047		7.8	-18.864		27.2	-0.59171
1.40102	0.00534	-5.13967e-05	1.4382	-0.000212722	5e-05		1.5622	0.00962	0.000370479	0.04824		8.5	-18.9789		30.2	-0.632
1.40722	0.006	-6.73134e-05	1.4506	0.000474805	0.000144862		1.5746	0.01134	0.000365582	0.05548		9.2	-18.9185		33.2	-0.5365
1.41342	0.000397631	-9.79788e-05	1.463	0.00099192	-3.10277e-05		1.587	0.01121	0.000372665	0.05465		9.9	-18.7456		36.2	-0.74541
1.41962	0.0051	-3.61301e-05	1.4754	-8.93198e-05	-0.000240514		1.5994	0.01314	0.000366723	0.05578		10.6	-18.7535		39.2	-0.57572
1.42582	0.00773	-1.71966e-05	1.4878	0.00102	0.000123123		1.6118	0.01036	0.00036667	0.05969		11.3	-18.6785		59.2	-0.59889
1.43202	0.00295	-6.71814e-05	1.5002	0.00149	3.02372e-05		1.6242	0.00993	0.000381273	0.04585		12	-18.7758		79.2	-0.63604
1.43822	0.00605	-3.22499e-05	1.5126	-0.00307	-0.000106126		1.6366	0.01006	0.000371541	0.05353		12.7	-18.7144		99.2	-0.48029
1.44442	0.00856	-5.89742e-05	1.525	-0.00124	-0.000936166		1.649	0.011	0.000363746	0.04957		13.4	-18.8713		119.2	-0.52416
1.45062	0.01624	4.06298e-07	1.5374	0.00060996	-0.000756324		1.6614	0.0127	0.000377297	0.05511		14.1	-18.8645		139.2	-0.45825
1.45681	0.0102	-6.09447e-06	1.5498	-0.00191	-0.000843281		1.6738	0.01015	0.000362568	0.05392		14.8	-18.9475		159.2	-0.36265
1.46301	0.00728	-6.56984e-05	1.5622	-0.00165	-0.000438142		1.6862	0.00846	0.000394401	0.05745		15.5	-18.901		179.2	-0.27645
1.46921	0.00286	-2.76994e-05	1.5746	4.58352e-05	-0.000789921		1.6986	0.0051	0.00041076	0.05668		16.2	-18.8427		199.2	-0.37187
1.47541	0.00599	-3.98375e-05	1.587	-0.00109	-0.000483597		1.711	0.00623	0.000396072	0.05006		16.9	-18.7804		219.2	-0.34148
1.48161	0.01603	-5.53683e-05	1.5994	0.000962539	-0.000772134		1.7234	0.00225	0.000421033	0.04174		17.6	-18.3519		239.2	-0.42738
1.48781	0.01146	-7.77959e-05	1.6118	-0.00124	-0.0012		1.7358	0.00559	0.00039203	0.05193		18.3	-18.3593		259.2	-0.37659
1.49401	0.02067	-7.44643e-05	1.6242	-0.00113	-0.000592292		1.7482	0.0068	0.000382378	0.09634		19	-18.4156		279.2	-0.28428
1.50021	0.01155	-7.55816e-05	1.6366	-0.00199	-0.00146		1.7606	0.00427	0.000403916	0.11714		19.7	-18.3737		299.2	-0.32461
1.50641	0.01857	-4.91925e-05	1.649	-0.0029	-0.000904545		1.773	0.0034	0.000409384	0.1103		20.4	-18.4153		319.2	-0.3874
1.51261	0.01404	-7.21484e-05	1.6614	-0.000853239	-0.000359091		1.7854	0.00335	0.00044052	0.1385		21.1	-18.3819		339.2	-0.28444
1.51881	0.01692	-6.87964e-05	1.6738	-0.00166	-0.00104		1.7978	0.00524	0.000466483	0.14728		21.8	-18.4133		359.2	-0.33519
1.52501	0.022	-2.44896e-05	1.6862	-0.00215	-0.00141		1.8102	0.00525	0.00048106	0.16801		22.5	-18.4262		379.2	-0.27861
1.5312	0.01497	-9.19757e-05	1.6986	-0.00199	-0.00117		1.8226	0.0011	0.000527656	0.17776		23.2	-18.4225		399.2	-0.28135
1.5374	0.01619	-4.31285e-05	1.711	-0.00166	-0.000582411		1.835	0.00272	0.000602087	0.17454		23.9	-18.4031		419.2	-0.28068
1.5436	0.02151	-3.7481e-05	1.7234	-0.000524166	-0.000574506		1.8474	0.00512	0.000699998	0.21435		24.6	-18.2964		439.2	-0.17757
1.5498	0.0122	-5.55816e-05	1.7358	-0.000600558	-0.00117		1.8598	0.00283	0.00079317	0.22037		29.6	-18.3041		459.2	-0.23984
1.556	0.02184	-8.34333e-05	1.7482	-0.00202	0.000192292		1.8722	0.00648	0.000906876	0.24079		34.6	-18.088		479.2	-0.22595
1.5622	0.01923	-6.55562e-05	1.7606	0.00029264	0.000435375		1.8846	0.00438	0.00111	0.26531		39.6	-18.0183		499.2	-0.13191
1.5684	0.01685	-3.45353e-05	1.773	-0.00264	0.000957115		1.897	0.00339	0.00127	0.29675		44.6	-17.9402		519.2	-0.19241
1.5746	0.01439	-7.62825e-06	1.7854	-0.00187	0.00146		1.9094	0.01076	0.00146	0.3157		49.6	-18.0251		539.2	-0.12266
1.5808	0.01229	-8.15034e-05	1.7978	-0.00102	0.00146		1.9218	0.01303	0.00178	0.349		54.6	-18.0182		559.2	-0.28127
1.587	0.01	-1.22397e-05	1.8102	-0.000923755	0.00158		1.9342	0.01315	0.00214	0.38885		59.6	-17.996		579.2	-0.11016
1.5932	0.01633	-3.53479e-05	1.8226	-0.000800353	0.002		1.9466	0.01235	0.00247	0.44248		64.6	-17.6665		599.2	-0.05905
1.5994	0.01406	-7.93297e-06	1.835	-0.00253	0.00213		1.959	0.01782	0.00285	0.46153		69.6	-17.7294		619.2	0
1.6056	0.01402	-5.74099e-05	1.8474	-0.00161	0.0028		1.9713	0.018	0.00337	0.5143		74.6	-17.5755		639.2	-0.10429
1.61179	0.0111	-1.71356e-05	1.8598	-0.000465403	0.00308		1.9837	0.02129	0.00389	0.53426		79.6	-17.6361		659.2	-0.08454
1.61799	0.01445	-3.85374e-05	1.8722	-0.000917879	0.00293		1.9961	0.01526	0.00438	0.57379		84.6	-17.6517
1.62419	0.01973	-1.86491e-05	1.8846	-0.000171588	0.00439		2.0085	0.0191	0.00517	0.64044		89.6	-17.5879
1.63039	0.01821	-5.63434e-05	1.897	5.17115e-05	0.00484		2.0209	0.02423	0.00578	0.65942		94.6	-17.6148
1.63659	0.01757	-5.45963e-05	1.9094	0.001	0.00554		2.0333	0.02234	0.00668	0.72499		99.6	-17.448
1.64279	0.01485	-4.68157e-05	1.9218	-0.00169	0.00537		2.0457	0.0295	0.00743	0.77667		124.6	-17.516
1.64899	0.01522	-7.39767e-05	1.9342	0.00040429	0.00623		2.0581	0.02838	0.00797	0.77594		149.6	-17.3598
1.65519	0.01478	7.73693e-05	1.9466	0.000345527	0.00723		2.0705	0.02616	0.00927	0.82507		174.6	-17.1359
1.66139	0.01797	-1.60488e-06	1.959	-0.00101	0.00823		2.0829	0.03339	0.00982	0.86382		199.6	-17.2361
1.66759	0.01897	-5.67395e-05	1.9713	-0.00149	0.0103		2.0953	0.03041	0.01098	0.91555		224.6	-17.2751
1.67379	0.01527	-1.07161e-05	1.9837	-0.000864992	0.01186		2.1077	0.02583	0.01201	0.97055		249.6	-17.1558
1.67999	0.02028	0	1.9961	0.0006746	0.01318		2.1201	0.02756	0.01333	1.01189		274.6	-17.0713
1.68619	0.01607	-8.03454e-06	2.0085	0.00126	0.01158		2.1325	0.03057	0.01489	1.08718		299.6	-17.0125
1.69238	0.01515	1.75927e-05	2.0209	-0.00020097	0.01315		2.1449	0.02688	0.01622	1.09147		324.6	-16.9119
1.69858	0.01187	-6.19808e-05	2.0333	0.00161	0.01447		2.1573	0.0343	0.01868	1.14809		349.6	-16.893
1.70478	0.01902	-2.78416e-05	2.0457	0.00139	0.01529		2.1697	0.03637	0.01936	1.21127		374.6	-16.9519
1.71098	0.01441	-8.40326e-05	2.0581	0.00072161	0.0166		2.1821	0.03406	0.02041	1.19422		399.6	-16.9764
1.71718	0.01646	-5.90148e-05	2.0705	0.000921404	0.01659		2.1945	0.03487	0.02198	1.21731		424.6	-16.9794
1.72338	0.02419	-2.50991e-05	2.0829	0.00168	0.017		2.2069	0.03785	0.02462	1.26797		449.6	-16.9215
1.72958	0.02487	-3.92789e-05	2.0953	0.000533568	0.01661		2.2193	0.04009	0.02615	1.32789		474.6	-16.7767
1.73578	0.02077	-4.10361e-05	2.1077	0.00191	0.0196		2.2317	0.04301	0.0284	1.31997		499.6	-16.8569
1.74198	0.01404	-4.27933e-05	2.1201	0.00196	0.0208		2.2441	0.04489	0.02983	1.34884		524.6	-16.871
1.74818	0.01952	0.000271793	2.1325	0.00209	0.02182		2.2565	0.04418	0.03243	1.3044		549.6	-16.8667
1.75438	0.02597	0.000651275	2.1449	-0.000506537	0.02487		2.2689	0.04789	0.03344	1.33822		574.6	-16.9678
1.76058	0.0176	0.000570656	2.1573	0.000539445	0.02638		2.2813	0.04744	0.03654	1.3951		599.6	-16.7566
1.76677	0.0118	0.000790422	2.1697	0.000251506	0.02837		2.2937	0.05215	0.03891	1.47277		624.6	-16.7039
1.77297	0.02183	0.000877411	2.1821	0.00133	0.02897		2.3061	0.05561	0.04098	1.49895		649.6	-16.9719
1.77917	0.02279	0.000930169	2.1945	0.000692229	0.03043		2.3185	0.05774	0.04167	1.50278		674.6	-16.8843
1.78537	0.01351	0.00104	2.2069	0.000480682	0.03044		2.3309	0.0622	0.04571	1.5145
1.79157	0.01618	0.000990057	2.2193	0.00178	0.03368		2.3433	0.06683	0.04754	1.54147
1.79777	0.01954	0.00132	2.2317	0.00187	0.03309		2.3557	0.06476	0.05219	1.64019
1.80397	0.00811	0.00121	2.2441	0.000380784	0.03527		2.3681	0.06498	0.05544	1.63293
1.81017	0.01547	0.00126	2.2565	0.000668723	0.03754		2.3805	0.07363	0.05992	1.73995
1.81637	0.01881	0.00155	2.2689	-0.000424269	0.03877		2.3929	0.0756	0.06487	1.78317
1.82257	0.01793	0.0014	2.2813	0.000351403	0.04149		2.4053	0.07893	0.06626	1.83754
1.82877	0.0192	0.00168	2.2937	-0.000353753	0.04195		2.4177	0.08423	0.07495	1.84849
1.83497	0.02366	0.00183	2.3061	0.00088027	0.04831		2.4301	0.09292	0.07748	1.96643
1.84117	0.0185	0.00181	2.3185	-0.000488908	0.05098		2.4425	0.09809	0.08108	2.05846
1.84736	0.02025	0.0021	2.3309	-0.000124578	0.05436		2.4549	0.09917	0.08924	2.21892
1.85356	0.01869	0.00253	2.3433	0.00293	0.05915		2.4673	0.10334	0.09545	2.20898
1.85976	0.02031	0.00234	2.3557	0.00264	0.06417		2.4797	0.10486	0.09457	2.33664
1.86596	0.02086	0.00271	2.3681	0.00112	0.07067		2.4921	0.10591	0.09916	2.5402
1.87216	0.01723	0.00294	2.3805	0.00149	0.07332		2.5045	0.10688	0.10206	2.55682
1.87836	0.01694	0.00288	2.3929	0.0017	0.08167		2.5169	0.1154	0.10857	2.65344
1.88456	0.01586	0.00334	2.4053	0.00224	0.08527		2.5293	0.11798	0.10975	2.73756
1.89076	0.02241	0.00362	2.4177	0.00104	0.09253		2.5417	0.11791	0.11392	2.91322
1.89696	0.02286	0.00348	2.4301	0.0024	0.0983		2.5541	0.12268	0.11391	2.94575
1.90316	0.01749	0.00356	2.4425	0.00106	0.10133		2.5665	0.1266	0.11859	3.00788
1.90936	0.02124	0.00426	2.4549	0.00411	0.10642		2.5789	0.12611	0.11617	3.05991
1.91556	0.0272	0.00417	2.4673	0.00508	0.10779		2.5913	0.13055	0.12347	3.15071
1.92176	0.01568	0.00456	2.4797	0.0046	0.11436		2.6037	0.13187	0.12271	3.20196
1.92795	0.01383	0.00506	2.4921	0.00594	0.11657		2.6161	0.13669	0.12778	3.23733
1.93415	0.01287	0.00487	2.5045	0.0055	0.11895		2.6285	0.1414	0.13065	3.32355
1.94035	0.01694	0.00514	2.5169	0.00494	0.12213		2.6409	0.13898	0.13013	3.38672
1.94655	0.02354	0.00611	2.5293	0.00501	0.12561		2.6533	0.13512	0.13011	3.4394
1.95275	0.01966	0.00627	2.5417	0.00697	0.12892		2.6657	0.14286	0.13243	3.5011
1.95895	0.0182	0.00673	2.5541	0.00599	0.12435		2.6781	0.1405	0.1304	3.51572
1.96515	0.02195	0.00697	2.5665	0.00543	0.13053		2.6905	0.14267	0.12976	3.52839
1.97135	0.02051	0.00771	2.5789	0.00584	0.13046		2.7029	0.13935	0.13136	3.48468
1.97755	0.02405	0.00717	2.5913	0.00663	0.13257		2.7153	0.13674	0.13059	3.4513
1.98375	0.01762	0.00801	2.6037	0.00567	0.14206		2.7277	0.13897	0.12927	3.55389
1.98995	0.02039	0.00802	2.6161	0.00678	0.13731		2.7401	0.13544	0.12172	3.45469
1.99615	0.01733	0.00911	2.6285	0.00818	0.14113		2.7524	0.13582	0.12509	3.57825
2.00234	0.02098	0.01039	2.6409	0.0073	0.14124		2.7648	0.13421	0.12504	3.543
2.00854	0.01933	0.00952	2.6533	0.00803	0.14271		2.7772	0.13256	0.12227	3.43921
2.01474	0.02167	0.01027	2.6657	0.00942	0.1399		2.7896	0.12693	0.11982	3.4288
2.02094	0.02153	0.01208	2.6781	0.00854	0.13763		2.802	0.12311	0.1173	3.3352
2.02714	0.02526	0.01154	2.6905	0.00652	0.13708		2.8144	0.12315	0.10945	3.27486
2.03334	0.02633	0.01223	2.7029	0.00662	0.13259		2.8268	0.11962	0.11027	3.28795
2.03954	0.02556	0.0125	2.7153	0.00871	0.13516		2.8392	0.12134	0.10922	3.23367
2.04574	0.0283	0.01271	2.7277	0.00713	0.12834		2.8516	0.11485	0.10895	3.13149
2.05194	0.02559	0.014	2.7401	0.00778	0.12958		2.864	0.11032	0.10703	3.0428
2.05814	0.02972	0.0146	2.7524	0.00687	0.12857		2.8764	0.11297	0.10566	3.03636
2.06434	0.02101	0.01373	2.7648	0.00857	0.12437		2.8888	0.11211	0.10543	2.96604
2.07054	0.02685	0.01361	2.7772	0.00619	0.11891		2.9012	0.10736	0.10295	2.86727
2.07674	0.02616	0.01414	2.7896	0.00937	0.11787		2.9136	0.10763	0.10316	2.87151
2.08293	0.02189	0.01368	2.802	0.00626	0.11366		2.926	0.10706	0.1037	2.69998
2.08913	0.03018	0.01554	2.8144	0.00624	0.11383		2.9384	0.10346	0.09979	2.72334
2.09533	0.03134	0.01568	2.8268	0.00845	0.11486		2.9508	0.10432	0.10289	2.5687
2.10153	0.02665	0.01714	2.8392	0.00837	0.10921		2.9632	0.10338	0.0956	2.48813
2.10773	0.02913	0.01648	2.8516	0.01139	0.11576		2.9756	0.10021	0.09583	2.36941
2.11393	0.02507	0.01886	3.0376	0.02596	0.13487		2.988	0.10041	0.09961	2.39086
2.12013	0.02481	0.01835	3.05	0.02577	0.1271		3.0004	0.09813	0.09387	2.27703
2.12633	0.0279	0.01909	3.0624	0.02898	0.13123		3.0128	0.09286	0.09095	2.20551
2.13253	0.02716	0.01999	3.0748	0.03007	0.13182		3.0376	0.12038	0.09884	2.1841
2.13873	0.02932	0.01979	3.0872	0.0312	0.13369		3.05	0.10389	0.09216	1.9461
2.14493	0.03019	0.02024	3.0996	0.03207	0.13571		3.0624	0.08061	0.09054	1.8471
2.15113	0.02777	0.02223	3.112	0.03266	0.13801		3.0748	0.05	0.09595	1.7902
2.15733	0.02978	0.02315	3.1244	0.03472	0.14257		3.0872	0.07276	0.09444	1.7461
2.16352	0.02546	0.02318	3.1368	0.03391	0.14663		3.0996	0.14873	0.08663	1.6058
2.16972	0.0269	0.02273	3.1492	0.03441	0.14974		3.112	0.0875	0.08958	1.6375
2.17592	0.03316	0.0246	3.1616	0.0341	0.15324		3.1244	0.13959	0.09277	1.6212
2.18212	0.02945	0.02691	3.174	0.03332	0.15705		3.1368	0.09305	0.08519	1.5918
2.18832	0.02766	0.02711	3.1864	0.0338	0.16317		3.1492	0.13355	0.08911	1.5692
2.19452	0.02796	0.02593	3.1988	0.03535	0.16915		3.1616	0.07265	0.08577	1.5322
2.20072	0.02616	0.02642	3.2112	0.03539	0.17387		3.174	0.07345	0.086	1.4458
2.20692	0.02851	0.02959	3.2236	0.03683	0.17992		3.1864	0.07478	0.08381	1.4618
2.21312	0.02978	0.02936	3.236	0.03749	0.18632		3.1988	0.10525	0.09188	1.6019
2.21932	0.02136	0.03165	3.2484	0.03947	0.19229		3.2112	0.14369	0.0784	1.4621
2.22552	0.03331	0.03119	3.2608	0.04067	0.19668		3.2236	0.16264	0.08117	1.5632
2.23172	0.03079	0.03289	3.2732	0.04302	0.20324		3.236	0.13857	0.08242	1.5188
2.23791	0.03192	0.03314	3.2856	0.04465	0.21059		3.2484	0.19011	0.0863	1.567
2.24411	0.03342	0.03519	3.298	0.04568	0.21438		3.2608	0.20848	0.09266	1.6404
2.25031	0.03063	0.03749	3.3104	0.04829	0.22217		3.2732	0.20033	0.08501	1.7098
2.25651	0.03129	0.03447	3.3228	0.04902	0.22571		3.2856	0.24932	0.08869	1.6071
2.26271	0.03483	0.03845	3.3352	0.04977	0.22975		3.298	0.18888	0.07511	1.7003
2.26891	0.03703	0.04147	3.3476	0.05207	0.23617		3.3104	0.21326	0.08068	1.7861
2.27511	0.03385	0.04222	3.36	0.0532	0.24199		3.3228	0.25	0.08526	1.7248
2.28131	0.0373	0.04297	3.3724	0.05675	0.24675		3.3352	0.21309	0.08283	1.757
2.28751	0.04272	0.04384	3.3848	0.05784	0.25079		3.3476	0.24071	0.07941	1.8889
2.29371	0.04146	0.04681	3.3972	0.05874	0.25419		3.36	0.2464	0.07819	1.9311
2.29991	0.03204	0.04854	3.4096	0.06108	0.25582		3.3724	0.15798	0.08348	1.9894
2.30611	0.03931	0.05648	3.422	0.06221	0.25661		3.3848	0.17708	0.08204	2.0112
2.31231	0.03552	0.05191	3.4344	0.06409	0.25908		3.3972	0.17305	0.08338	2.1157
2.3185	0.04071	0.05482	3.4468	0.06908	0.26438		3.4096	0.15733	0.08724	2.1276
2.3247	0.04349	0.06006	3.4592	0.07017	0.26197		3.422	0.17215	0.08303	2.1647
2.3309	0.04221	0.05995	3.4716	0.06808	0.25705		3.4344	0.13365	0.08562	2.0714
2.3371	0.04443	0.06172	3.484	0.06443	0.25415		3.4468	0.16447	0.08501	2.0442
2.3433	0.04846	0.06906	3.5088	0.05601	0.28016		3.4592	0.15164	0.08672	2.0882
2.3495	0.04581	0.06843	3.5212	0.06953	0.29397		3.4716	0.09552	0.08129	2.0533
2.3557	0.05736	0.07112	3.5335	0.08163	0.32144		3.484	0.15253	0.08242	2.1115
2.3619	0.04586	0.07782	3.5459	0.09656	0.3284		3.5088	0.18861	0.09109	2.7237
2.3681	0.05126	0.08498	3.5583	0.09997	0.36978		3.5212	0.24903	0.10951	2.9669
2.3743	0.04859	0.07815	3.5707	0.1064	0.38126		3.5335	0.26708	0.11659	3.0217
2.3805	0.05667	0.08435	3.5831	0.11959	0.43654		3.5459	0.15699	0.11952	3.207
2.3867	0.05894	0.08687	3.5955	0.11501	0.4631		3.5583	0.24171	0.1373	3.2444
2.3929	0.06169	0.09562	3.6079	0.13473	0.46824		3.5707	0.28281	0.1762	3.5699
2.39909	0.06921	0.10878	3.6203	0.15582	0.47812		3.5831	0.23674	0.17978	3.7566
2.40529	0.06322	0.10718	3.6327	0.17169	0.58219		3.5955	0.30505	0.16646	3.7658
2.41149	0.07048	0.10871	3.6451	0.18323	0.60935		3.6079	0.2446	0.18925	4.0493
2.41769	0.06467	0.11499	3.6575	0.19578	0.66429		3.6203	0.29327	0.23365	4.1832
2.42389	0.06847	0.12015	3.6699	0.19273	0.70591		3.6327	0.26161	0.25871	4.6421
2.43009	0.06782	0.11803	3.6823	0.25598	0.7715		3.6451	0.35867	0.26891	4.8677
2.43629	0.07082	0.12748	3.6947	0.27893	0.82542		3.6575	0.29892	0.30666	5.3681
2.44249	0.07066	0.12449	3.7071	0.28287	0.84344		3.6699	0.42503	0.32167	5.4255
2.44869	0.06888	0.12896	3.7195	0.29462	0.89437		3.6823	0.47235	0.38427	5.9984
2.45489	0.07293	0.13731	3.7319	0.28722	0.86211		3.6947	0.46802	0.43636	6.7147
2.46109	0.07387	0.13397	3.7443	0.29336	0.85302		3.7071	0.44931	0.45749	7.1456
2.46729	0.0733	0.14003	3.7567	0.31369	0.89958		3.7195	0.49018	0.49699	7.6246
2.47348	0.0722	0.14365	3.7691	0.31419	0.8883		3.7319	0.51462	0.55044	8.1384
2.47968	0.0747	0.13707	3.7815	0.34809	0.93978		3.7443	0.54846	0.57928	8.4663
2.48588	0.07129	0.15195	3.7939	0.35791	0.9319		3.7567	0.60585	0.64572	8.6067
2.49208	0.07863	0.14683	3.8063	0.34733	0.93846		3.7691	0.60647	0.66417	9.1047
2.49828	0.07984	0.14756	3.8187	0.37518	0.93613		3.7815	0.62475	0.71385	9.6361
2.50448	0.0809	0.14547	3.8311	0.3857	1		3.7939	0.68607	0.76122	9.8912
2.51068	0.08336	0.15607	3.8435	0.35494	0.90976		3.8063	0.68049	0.7131	9.854
2.51688	0.07801	0.15671	3.8559	0.37624	1.00316		3.8187	0.66497	0.76933	9.9413
2.52308	0.08145	0.16324	3.8683	0.39146	0.94692		3.8311	0.6933	0.7804	10.0487
2.52928	0.08213	0.16474	3.8807	0.42834	0.92356		3.8435	0.75367	0.8254	10.4074
2.53548	0.07951	0.16344	3.8931	0.38679	0.9437		3.8559	0.76579	0.86993	10.6251
2.54168	0.08362	0.1674	3.9055	0.35976	0.89502		3.8683	0.75985	0.87867	10.8333
2.54788	0.08368	0.16321	3.9179	0.38935	0.8982		3.8807	0.82021	1	11.1937
2.55407	0.08249	0.16734	3.9303	0.36634	0.86053		3.8931	0.80234	0.95025	11.1884
2.56027	0.08263	0.16845	3.9427	0.34166	0.82976		3.9055	0.75538	0.97129	11.4256
2.56647	0.08101	0.17501	3.9551	0.30681	0.87998		3.9179	0.74014	0.9231	11.4498
2.57267	0.08342	0.17505	3.9675	0.34084	0.83998		3.9303	0.74227	0.91083	11.389
2.57887	0.08492	0.16773	3.9799	0.3443	0.85534		3.9427	0.71397	0.87988	11.5544
2.58507	0.08964	0.17937	3.9923	0.31316	0.77445		3.9551	0.75271	0.83804	11.5485
2.59127	0.09003	0.17965	4.0047	0.28733	0.72791		3.9675	0.80646	0.8782	11.838
2.59747	0.09102	0.17628	4.0171	0.29024	0.69986		3.9799	0.77115	0.88128	11.4192
2.60367	0.09281	0.18539	4.0295	0.2762	0.71852		3.9923	0.74018	0.83331	11.1875
2.60987	0.1	0.18348	4.0419	0.28513	0.66144		4.0047	0.80393	0.85411	11.2904
2.61607	0.09157	0.17859	4.0543	0.29694	0.6396		4.0171	0.80547	0.83081	11.1373
2.62227	0.09007	0.18081	4.0667	0.2898	0.62069		4.0295	0.79287	0.79915	11.2215
2.62846	0.09339	0.19178	4.0791	0.30164	0.62632		4.0419	0.85326	0.79647	11.2762
2.63466	0.08568	0.17663	4.0915	0.29682	0.55014		4.0543	0.84425	0.89286	11.2465
2.64086	0.08588	0.18554	4.1039	0.32012	0.63051		4.0667	0.88018	0.8209	10.985
2.64706	0.08853	0.18184	4.1163	0.32327	0.63796		4.0791	0.82356	0.7389	10.8152
2.65326	0.08896	0.17648	4.1287	0.31701	0.57399		4.0915	0.82937	0.74415	11.1414
2.65946	0.08332	0.17632	4.1411	0.32221	0.61409		4.1039	0.81842	0.78179	11.3842
2.66566	0.08071	0.17552	4.1535	0.31478	0.5767		4.1163	0.76851	0.76488	11.323
2.67186	0.07915	0.16632	4.1659	0.297	0.5447		4.1287	0.7618	0.6835	11.2662
2.67806	0.07544	0.1814	4.1783	0.27908	0.49433		4.1411	0.7267	0.66442	11.5404
2.68426	0.07589	0.17926	4.1907	0.29959	0.5533		4.1535	0.71388	0.63717	11.3934
2.69046	0.08116	0.17277	4.2031	0.34231	0.5549		4.1659	0.74767	0.54292	10.9469
2.69666	0.07328	0.1612	4.2155	0.33399	0.54725		4.1783	0.70195	0.47984	10.9875
2.70286	0.07141	0.16679	4.2279	0.36017	0.55816		4.1907	0.701	0.49161	11.4032
2.70905	0.0723	0.16739	4.2403	0.386	0.59864		4.2031	0.68573	0.4471	11.5833
2.71525	0.07237	0.17181	4.2527	0.38594	0.59603		4.2155	0.68416	0.44948	11.5592
2.72145	0.07441	0.16158	4.2651	0.44696	0.65759		4.2279	0.69993	0.47461	12.1719
2.72765	0.07299	0.16102	4.2775	0.49203	0.6684		4.2403	0.77223	0.53976	12.5683
2.73385	0.07584	0.15554	4.2899	0.50346	0.71213		4.2527	0.81291	0.50021	12.9023
2.74005	0.07531	0.15823	4.3023	0.48995	0.73109		4.2651	0.81278	0.47979	13.2483
2.74625	0.07212	0.16199	4.3147	0.5624	0.78899		4.2775	0.747	0.47577	13.7628
2.75245	0.06982	0.1551	4.327	0.56772	0.73591		4.2899	0.76615	0.51886	14.3232
2.75865	0.06906	0.14602	4.3394	0.61185	0.73966		4.3023	0.75021	0.51739	14.7248
2.76485	0.07181	0.15138	4.3518	0.67476	0.79735		4.3147	0.75011	0.556	15.476
2.77105	0.07156	0.14883	4.3642	0.63536	0.7348		4.327	0.75664	0.54243	15.8658
2.77725	0.06661	0.15006	4.3766	0.63906	0.75875		4.3394	0.81217	0.52476	16.4442
2.78345	0.06686	0.14332	4.389	0.727	0.79198		4.3518	0.90433	0.61094	17.2402
2.78964	0.06938	0.15009	4.4014	0.70464	0.78022		4.3642	0.84307	0.49433	16.9683
2.79584	0.06878	0.1431	4.4138	0.70176	0.76937		4.3766	0.80836	0.50491	17.3221
2.80204	0.06422	0.12892	4.4262	0.72106	0.72943		4.389	0.82993	0.52509	18.2038
2.80824	0.06271	0.12888	4.4386	0.72706	0.77034		4.4014	0.80042	0.49907	18.3384
2.81444	0.06387	0.14176	4.451	0.75855	0.7696		4.4138	0.80575	0.47369	18.1929
2.82064	0.06992	0.13026	4.4634	0.80598	0.78715		4.4262	0.86543	0.47261	18.7465
2.82684	0.06724	0.1325	4.4758	0.82331	0.79885		4.4386	0.85355	0.48584	19.4083
2.83304	0.06549	0.12638	4.4882	0.75855	0.73561		4.451	0.87426	0.46173	19.5315
2.83924	0.06381	0.12269	4.5006	0.80462	0.75885		4.4634	0.83591	0.47782	20.1413
2.84544	0.06561	0.13126	4.513	0.83077	0.79743		4.4758	0.85469	0.49088	20.6924
2.85164	0.06206	0.13189	4.5254	0.87969	0.79464		4.4882	0.81592	0.41443	20.2544
3.0376	0.08121	0.06393	4.5378	0.92532	0.82808		4.5006	0.82524	0.42118	20.5316
3.05	0.10193	0.07029	4.5502	1.01867	0.87245		4.513	0.87825	0.48706	21.7014
3.0624	0.11024	0.06984	4.5626	0.95523	0.8367		4.5254	0.89775	0.50066	21.7629
3.0748	0.12511	0.06288	4.575	0.93567	0.83704		4.5378	0.91199	0.48985	22.3285
3.0872	0.08	0.07157	4.5874	1.03868	0.8463		4.5502	0.95753	0.55978	22.5565
3.0996	0.08457	0.06734	4.5998	0.9922	0.82196		4.5626	0.93687	0.56468	22.8644
3.112	0.09699	0.06566	4.6122	1.03606	0.81524		4.575	0.95016	0.55975	22.6541
3.1244	0.15127	0.06879	4.6246	0.98797	0.78249		4.5874	0.97299	0.58753	23.3729
3.1368	0.08978	0.06881	4.637	0.99258	0.75834		4.5998	0.93601	0.55124	22.8666
3.1492	0.08993	0.07408	4.6494	0.96937	0.73741		4.6122	0.91722	0.50714	22.5881
3.1616	0.08423	0.07571	4.6618	0.96428	0.68472		4.6246	0.9248	0.54549	22.9507
3.174	0.11405	0.07775	4.6742	0.94495	0.6949		4.637	0.87983	0.49322	22.0157
3.1864	0.12451	0.0724	4.6866	1.03882	0.72927		4.6494	0.84935	0.468	21.6527
3.1988	0.10952	0.07318	4.699	0.9644	0.68763		4.6618	0.8336	0.4215	21.3404
3.2112	0.13406	0.07389	4.7114	1.01109	0.68089		4.6742	0.85804	0.46605	22.0677
3.2236	0.14323	0.07399	4.7238	1.04	0.65105		4.6866	0.91024	0.47953	22.6726
3.236	0.14474	0.07113	4.7362	0.94072	0.59672		4.699	0.91693	0.43706	22.9295
3.2484	0.11541	0.07493	4.7486	0.89318	0.5685		4.7114	1	0.51028	23.3152
3.2608	0.11643	0.0775	4.761	0.868	0.57158		4.7238	0.96315	0.49007	23.2368
3.2732	0.11632	0.07532	4.7734	0.87161	0.54723		4.7362	0.86032	0.46622	22.4428
3.2856	0.10737	0.08157	4.7858	0.84867	0.54073		4.7486	0.86956	0.41566	21.7667
3.298	0.1749	0.08258	4.7982	0.90367	0.53071		4.761	0.84393	0.42009	22.1482
3.3104	0.10563	0.07724	4.8106	0.87984	0.51075		4.7734	0.83293	0.42062	21.6156
3.3228	0.14572	0.07826	4.823	0.75729	0.45358		4.7858	0.82212	0.36386	20.752
3.3352	0.15886	0.08482	4.8354	0.76872	0.458		4.7982	0.82418	0.39092	21
3.3476	0.16769	0.08319	4.8478	0.76778	0.4583		4.8106	0.84877	0.38296	20.3341
3.36	0.12228	0.0864	4.8602	0.76528	0.45743		4.823	0.7946	0.35127	19.7405
3.3724	0.15429	0.08482	4.8726	0.68801	0.40563		4.8354	0.73911	0.36096	19.2366
3.3848	0.16188	0.0874	4.885	0.63609	0.36534		4.8478	0.70145	0.3165	17.9609
3.3972	0.13764	0.08976	4.8974	0.68466	0.38488		4.8602	0.6726	0.30341	17.5534
3.4096	0.14765	0.09084	4.9098	0.60938	0.34484		4.8726	0.60359	0.25751	16.3017
3.422	0.14436	0.08953	4.9222	0.57874	0.31059		4.885	0.60184	0.23726	15.8574
3.4344	0.13402	0.0896	4.9346	0.5795	0.31423		4.8974	0.62172	0.26938	16.3186
3.4468	0.18	0.08811	4.947	0.70452	0.36277		4.9098	0.639	0.25444	15.9477
3.4592	0.17619	0.08626	4.9594	0.70056	0.36709		4.9222	0.63167	0.22144	14.7893
3.4716	0.16834	0.08387	4.9718	0.64012	0.34075		4.9346	0.67219	0.233	14.642
3.484	0.16286	0.10083	4.9842	0.54874	0.27184		4.947	0.63989	0.33575	14.3913
3.5088	0.21491	0.07501	4.9966	0.51607	0.25595		4.9594	0.60301	0.34719	14.7439
3.5212	0.16371	0.10176	5.009	0.5671	0.29522		4.9718	0.53644	0.275	12.5233
3.5335	0.16052	0.10986	5.0214	0.5976	0.29504		4.9842	0.48933	0.24018	11.2883
3.5459	0.21998	0.12794	5.0338	0.5716	0.26243		4.9966	0.43801	0.22779	10.6144
3.5583	0.22029	0.12647	5.0462	0.5369	0.26433		5.009	0.52774	0.28414	11.2716
3.5707	0.20759	0.18015	5.0586	0.52312	0.26047		5.0214	0.55189	0.28885	11.2854
3.5831	0.23775	0.20255	5.071	0.51915	0.25628		5.0338	0.504	0.28526	10.3806
3.5955	0.23611	0.1844	5.0834	0.54739	0.24666		5.0462	0.51869	0.29038	9.8452
3.6079	0.26097	0.20135	5.0958	0.52338	0.23777		5.0586	0.45766	0.27242	9.5076
3.6203	0.32573	0.22833	5.1081	0.48792	0.23486		5.071	0.52561	0.30108	9.9049
3.6327	0.30235	0.28883	5.1205	0.44485	0.20298		5.0834	0.48464	0.28407	9.4309
3.6451	0.34654	0.30374	5.1329	0.45478	0.19806		5.0958	0.53901	0.28411	9.5497
3.6575	0.382	0.37432	5.1453	0.41779	0.19		5.1081	0.53898	0.28922	9.2868
3.6699	0.40008	0.40907	5.1577	0.41074	0.19439		5.1205	0.42012	0.25638	8.2316
3.6823	0.48978	0.45811	5.1701	0.39602	0.18227		5.1329	0.44025	0.23366	7.559
3.6947	0.60356	0.60625	5.1825	0.40195	0.18415		5.1453	0.43942	0.2429	7.2896
3.7071	0.48503	0.58568	5.1949	0.40897	0.16318		5.1577	0.41399	0.24765	7.5114
3.7195	0.62468	0.60071	5.2073	0.42657	0.18508		5.1701	0.38264	0.26918	7.3588
3.7319	0.67682	0.64561	5.2197	0.3743	0.15704		5.1825	0.4179	0.27808	7.1334
3.7443	0.6105	0.63075	5.2321	0.38403	0.15006		5.1949	0.37844	0.27059	6.5714
3.7567	0.55984	0.66838	5.2445	0.34992	0.12792		5.2073	0.38702	0.26221	6.4814
3.7691	0.68788	0.73213	5.2569	0.33431	0.12796		5.2197	0.39734	0.26022	5.9293
3.7815	0.67362	0.81444	5.2693	0.36813	0.13093		5.2321	0.30513	0.23452	5.2418
3.7939	0.70183	0.76752	5.2817	0.33872	0.12399		5.2445	0.24072	0.21711	4.9758
3.8063	0.76192	0.79231	5.2941	0.32183	0.11822		5.2569	0.23561	0.23442	4.8055
3.8187	0.82793	0.91452	5.3065	0.28598	0.10346		5.2693	0.2891	0.25699	5.0716
3.8311	0.80759	0.90316	5.3189	0.25969	0.09968		5.2817	0.2714	0.23745	4.7759
3.8435	0.94436	0.94195	5.3313	0.23868	0.08223		5.2941	0.28016	0.24114	4.727
3.8559	0.63068	0.93532	5.3437	0.2239	0.07405		5.3065	0.23616	0.21425	4.192
3.8683	0.84242	0.96808	5.3561	0.22748	0.07567		5.3189	0.2293	0.20176	3.9081
3.8807	1	0.99596	5.3685	0.17016	0.06263		5.3313	0.18789	0.204	3.6671
3.8931	0.85933	0.94526	5.3809	0.19986	0.07077		5.3437	0.1997	0.17445	3.3177
3.9055	0.85964	0.98241	5.3933	0.1892	0.07077		5.3561	0.13048	0.17031	2.9983
3.9179	0.80213	1	5.4057	0.19602	0.062		5.3685	0.1388	0.16561	2.8369
3.9303	0.68079	0.92241	5.4181	0.19102	0.04968		5.3809	0.18061	0.1697	2.7777
3.9427	0.7097	0.86368	5.4305	0.16522	0.05079		5.3933	0.17854	0.17694	2.7696
3.9551	0.73051	0.88403	5.4429	0.18608	0.05202		5.4057	0.14708	0.18338	2.76
3.9675	0.70511	0.84948	5.4553	0.1637	0.04913		5.4181	0.16141	0.18316	2.565
3.9799	0.58673	0.85368	5.4677	0.17081	0.04688		5.4305	0.15651	0.15355	2.1741
3.9923	0.52438	0.82244	5.4801	0.13546	0.02787		5.4429	0.16365	0.1527	2.3715
4.0047	0.51441	0.73953	5.4925	0.15717	0.03225		5.4553	0.16182	0.15442	2.1382
4.0171	0.58587	0.70075	5.5049	0.11686	0.02941		5.4677	0.16824	0.14482	1.9712
4.0295	0.54792	0.68659	5.5173	0.10778	0.01937		5.4801	0.10764	0.14087	1.8475
4.0419	0.55314	0.70351	5.5297	0.10514	0.02727		5.4925	0.14353	0.14073	1.8207
4.0543	0.44458	0.64152	5.5421	0.11436	0.02678		5.5049	0.13796	0.12616	1.6798
4.0667	0.39953	0.67048	5.5545	0.11225	0.01866		5.5173	0.11032	0.11484	1.5189
4.0791	0.30952	0.57318	5.5669	0.11525	0.03275		5.5297	0.09034	0.12286	1.502
4.0915	0.42884	0.63983	5.5793	0.11445	0.02095		5.5421	0.02997	0.12406	1.4529
4.1039	0.40515	0.6365	5.5917	0.10579	0.01885		5.5545	0.03999	0.13346	1.4411
4.1163	0.34693	0.60962	5.6041	0.10764	0.02075		5.5669	0.08004	0.16191	1.6265
4.1287	0.46936	0.48155	5.6165	0.08313	0.01464		5.5793	0.08175	0.14575	1.4909
4.1411	0.40592	0.53361	5.6289	0.08422	0.01344		5.5917	0.09283	0.14149	1.4085
4.1535	0.42494	0.4783	5.6413	0.0737	0.01271		5.6041	0.10535	0.10104	1.1939
4.1659	0.38052	0.42287	5.6537	0.07599	0.01182		5.6165	0.03522	0.10333	1.2017
4.1783	0.33711	0.3767	5.6661	0.07526	0.0098		5.6289	0.05614	0.10759	1.1841
4.1907	0.27632	0.38688	5.6785	0.07382	0.01864		5.6413	0.04704	0.09281	1.0591
4.2031	0.34771	0.34459	5.6909	0.06944	0.00933		5.6537	0.03111	0.08798	1.0284
4.2155	0.3269	0.36371	5.7033	0.0987	0.02073		5.6661	0	0.07009	1.0038
4.2279	0.30469	0.39577	5.7157	0.06674	0.000928854		5.6785	0.01108	0.06797	0.8696
4.2403	0.39766	0.43241	5.7281	0.06827	0.01042		5.6909	0.02173	0.08979	1.0574
4.2527	0.25115	0.45511	5.7405	0.07449	0.00887		5.7033	0.01209	0.10275	1.1556
4.2651	0.34358	0.46922	5.7529	0.08851	0.01302		5.7157	0.00818	0.07397	0.8431
4.2775	0.36065	0.44675					5.7281	0.05321	0.07774	0.8919
4.2899	0.36314	0.47694					5.7405	0.01183	0.07246	0.8824
4.3023	0.33836	0.47038					5.7529	0.04947	0.0887	0.9855
4.3147	0.53428	0.60994
4.327	0.45393	0.54694
4.3394	0.5116	0.52539
4.3518	0.44115	0.53118
4.3642	0.44146	0.45755
4.3766	0.48269	0.4561
4.389	0.34054	0.46378
4.4014	0.58236	0.48938
4.4138	0.40569	0.39437
4.4262	0.40912	0.45372
4.4386	0.48183	0.47659
4.451	0.47567	0.40346
4.4634	0.45845	0.44003
4.4758	0.38668	0.4964
4.4882	0.44855	0.40897
4.5006	0.47684	0.42423
4.513	0.65515	0.52899
4.5254	0.54316	0.54544
4.5378	0.47357	0.5451
4.5502	0.55774	0.60841
4.5626	0.61213	0.55428
4.575	0.53459	0.54612
4.5874	0.71469	0.66349
4.5998	0.66193	0.56151
4.6122	0.61174	0.58713
4.6246	0.65687	0.66167
4.637	0.73854	0.63095
4.6494	0.68578	0.59309
4.6618	0.66029	0.59867
4.6742	0.72054	0.57137
4.6866	0.6751	0.58773
4.699	0.49913	0.52117
4.7114	0.71259	0.62558
4.7238	0.52742	0.5196
4.7362	0.42361	0.42728
4.7486	0.50529	0.41248
4.761	0.39322	0.41236
4.7734	0.49991	0.38815
4.7858	0.29682	0.32492
4.7982	0.47334	0.39977
4.8106	0.42712	0.36987
4.823	0.53615	0.37175
4.8354	0.44045	0.3556
4.8478	0.39688	0.36675
4.8602	0.48315	0.38653
4.8726	0.42369	0.31549
4.885	0.34451	0.26479
4.8974	0.32285	0.31779
4.9098	0.4032	0.26508
4.9222	0.34553	0.24194
4.9346	0.3117	0.25854
4.947	0.46967	0.46085
4.9594	0.53108	0.47219
4.9718	0.34677	0.4079
4.9842	0.24523	0.38676
4.9966	0.3467	0.39425
5.009	0.34732	0.45065
5.0214	0.33999	0.48197
5.0338	0.50381	0.47475
5.0462	0.54901	0.49957
5.0586	0.40896	0.477
5.071	0.3241	0.49745
5.0834	0.28466	0.47997
5.0958	0.24429	0.44431
5.1081	0.30594	0.43653
5.1205	0.3527	0.41186
5.1329	0.28786	0.3977
5.1453	0.45035	0.43669
5.1577	0.30126	0.44822
5.1701	0.26144	0.44785
5.1825	0.27406	0.49958
5.1949	0.31848	0.49637
5.2073	0.25022	0.50205
5.2197	0.34412	0.49137
5.2321	0.31217	0.46014
5.2445	0.34132	0.46985
5.2569	0.25778	0.4911
5.2693	0.34646	0.50369
5.2817	0.32714	0.45257
5.2941	0.32815	0.45458
5.3065	0.32947	0.40603
5.3189	0.32503	0.3839
5.3313	0.23829	0.36869
5.3437	0.24764	0.32848
5.3561	0.22988	0.32271
5.3685	0.25676	0.3065
5.3809	0.24461	0.30112
5.3933	0.21819	0.32227
5.4057	0.23954	0.33286
5.4181	0.22536	0.33438
5.4305	0.20276	0.29386
5.4429	0.16363	0.29991
5.4553	0.25279	0.28628
5.4677	0.13909	0.27375
5.4801	0.17197	0.25
5.4925	0.19753	0.25151
5.5049	0.17361	0.24153
5.5173	0.16317	0.22426
5.5297	0.1779	0.2229
5.5421	0.18405	0.22456
5.5545	0.18226	0.21559
5.5669	0.18086	0.26972
5.5793	0.16036	0.25381
5.5917	0.18795	0.24344
5.6041	0.19707	0.17262
5.6165	0.17696	0.17791
5.6289	0.21694	0.18983
5.6413	0.16239	0.15619
5.6537	0.15794	0.1411
5.6661	0.22434	0.12784
5.6785	0.13043	0.1237
5.6909	0.16504	0.15387
5.7033	0.16449	0.19631
5.7157	0.16465	0.12173
5.7281	0.14275	0.13669
5.7405	0.16924	0.13657
5.7529	0.1987	0.15447

## Sheet: Figure S1
Figure S1a									Figure S1b
Electron binding energy (eV)	Intensity (2.48 eV, a.u.)	Electron binding energy (eV)	Intensity (3.54 eV, a.u.)	Electron binding energy (eV)	Intensity (4.13 eV, a.u.)	Electron binding energy (eV)	Intensity (4.59 eV, a.u.)		Electron binding energy (eV)	Intensity (2.48 eV, a.u.)	Electron binding energy (eV)	Intensity (3.54 eV, a.u.)	Electron binding energy (eV)	Intensity (4.13 eV, a.u.)	Electron binding energy (eV)	Intensity (4.59 eV, a.u.)
2.08333e-05	0	2.08333e-05	0.1781	2.08333e-05	0.06934	2.08333e-05	0.08882		2.08333e-05	0.10287	2.08333e-05	0.31021	2.08333e-05	0	2.08333e-05	0.05495
8.33333e-05	0.10784	8.33333e-05	0.31602	8.33333e-05	0.14911	8.33333e-05	0.14739		8.33333e-05	0.1824	8.33333e-05	0.46497	8.33333e-05	0	8.33333e-05	0.11029
0.0001875	0.1914	0.0001875	0.29796	0.0001875	0.21585	0.0001875	0.15334		0.0001875	0.25693	0.0001875	0.47938	0.0001875	0.07207	0.0001875	0.13638
0.000333333	0.17864	0.000333333	0.40026	0.000333333	0.24823	0.000333333	0.1446		0.000333333	0.30739	0.000333333	0.52209	0.000333333	0.03826	0.000333333	0.18465
0.000520833	0.18697	0.000520833	0.54359	0.000520833	0.21226	0.000520833	0.16008		0.000520833	0.38297	0.000520833	0.60017	0.000520833	0	0.000520833	0.26358
0.00075	0.18977	0.00075	0.57361	0.00075	0.18394	0.00075	0.21223		0.00075	0.4773	0.00075	0.74493	0.00075	0.1628	0.00075	0.36929
0.00102	0.22095	0.00102	0.51872	0.00102	0.25533	0.00102	0.224		0.00102	0.42034	0.00102	0.81828	0.00102	0.29285	0.00102	0.36422
0.00133	0.30475	0.00133	0.49269	0.00133	0.31162	0.00133	0.22865		0.00133	0.46767	0.00133	0.88136	0.00133	0.25231	0.00133	0.33745
0.00169	0.3659	0.00169	0.53856	0.00169	0.31361	0.00169	0.3017		0.00169	0.61338	0.00169	0.9185	0.00169	0.28158	0.00169	0.43298
0.00208	0.40427	0.00208	0.58918	0.00208	0.32146	0.00208	0.41145		0.00208	0.65211	0.00208	0.95274	0.00208	0.48299	0.00208	0.51546
0.00252	0.39151	0.00252	0.51712	0.00252	0.30836	0.00252	0.37787		0.00252	0.58035	0.00252	0.93682	0.00252	0.57838	0.00252	0.45398
0.003	0.39664	0.003	0.50936	0.003	0.25127	0.003	0.27898		0.003	0.58053	0.003	0.86427	0.003	0.52893	0.003	0.4166
0.00352	0.40752	0.00352	0.59334	0.00352	0.2378	0.00352	0.31217		0.00352	0.67313	0.00352	0.88243	0.00352	0.52226	0.00352	0.48483
0.00408	0.4241	0.00408	0.55398	0.00408	0.33529	0.00408	0.41207		0.00408	0.69978	0.00408	1	0.00408	0.63458	0.00408	0.53191
0.00469	0.43814	0.00469	0.57053	0.00469	0.42455	0.00469	0.40194		0.00469	0.62472	0.00469	0.93833	0.00469	0.78766	0.00469	0.53381
0.00533	0.4256	0.00533	0.66179	0.00533	0.44408	0.00533	0.34939		0.00533	0.60912	0.00533	0.8237	0.00533	0.90453	0.00533	0.54644
0.00602	0.4246	0.00602	0.65279	0.00602	0.46008	0.00602	0.38858		0.00602	0.71548	0.00602	0.85142	0.00602	0.85916	0.00602	0.57582
0.00675	0.4387	0.00675	0.63517	0.00675	0.47714	0.00675	0.43781		0.00675	0.75201	0.00675	0.88611	0.00675	0.77159	0.00675	0.64262
0.00752	0.4328	0.00752	0.69003	0.00752	0.46161	0.00752	0.46821		0.00752	0.69099	0.00752	0.87552	0.00752	0.75981	0.00752	0.65372
0.00833	0.42986	0.00833	0.75584	0.00833	0.47228	0.00833	0.53529		0.00833	0.66819	0.00833	0.87908	0.00833	0.79161	0.00833	0.63696
0.00919	0.45394	0.00919	0.64244	0.00919	0.4652	0.00919	0.5444		0.00919	0.65576	0.00919	0.84319	0.00919	0.76652	0.00919	0.65663
0.01008	0.44353	0.01008	0.57625	0.01008	0.45753	0.01008	0.52175		0.01008	0.66213	0.01008	0.83468	0.01008	0.64621	0.01008	0.63325
0.01102	0.42203	0.01102	0.63655	0.01102	0.479	0.01102	0.50371		0.01102	0.65167	0.01102	0.8065	0.01102	0.66546	0.01102	0.62201
0.012	0.50188	0.012	0.67603	0.012	0.4857	0.012	0.50169		0.012	0.65195	0.012	0.72012	0.012	0.80584	0.012	0.68197
0.01302	0.52488	0.01302	0.69551	0.01302	0.5202	0.01302	0.54086		0.01302	0.69629	0.01302	0.71967	0.01302	0.80821	0.01302	0.67981
0.01408	0.49419	0.01408	0.69528	0.01408	0.59012	0.01408	0.60634		0.01408	0.70703	0.01408	0.7829	0.01408	0.89448	0.01408	0.67365
0.01519	0.5277	0.01519	0.70859	0.01519	0.57055	0.01519	0.59495		0.01519	0.67875	0.01519	0.75484	0.01519	1	0.01519	0.69753
0.01633	0.6	0.01633	0.72187	0.01633	0.55481	0.01633	0.5354		0.01633	0.7184	0.01633	0.69131	0.01633	0.84814	0.01633	0.69306
0.01752	0.63122	0.01752	0.72682	0.01752	0.59409	0.01752	0.53345		0.01752	0.76875	0.01752	0.70512	0.01752	0.7208	0.01752	0.71711
0.01875	0.59778	0.01875	0.77239	0.01875	0.6553	0.01875	0.62572		0.01875	0.77317	0.01875	0.77689	0.01875	0.82991	0.01875	0.81661
0.02002	0.52014	0.02002	0.84774	0.02002	0.7334	0.02002	0.71913		0.02002	0.84222	0.02002	0.79968	0.02002	0.84885	0.02002	0.87588
0.02133	0.5772	0.02133	0.91853	0.02133	0.79506	0.02133	0.74837		0.02133	0.98764	0.02133	0.79874	0.02133	0.71558	0.02133	0.83864
0.02269	0.70916	0.02269	0.89243	0.02269	0.76748	0.02269	0.75437		0.02269	1	0.02269	0.79475	0.02269	0.73997	0.02269	0.82252
0.02408	0.75245	0.02408	0.81193	0.02408	0.73549	0.02408	0.7848		0.02408	0.9063	0.02408	0.77472	0.02408	0.88533	0.02408	0.8886
0.02552	0.76507	0.02552	0.81186	0.02552	0.78545	0.02552	0.79201		0.02552	0.89031	0.02552	0.73747	0.02552	0.78988	0.02552	0.90715
0.027	0.76017	0.027	0.85421	0.027	0.79732	0.027	0.79209		0.027	0.93424	0.027	0.71416	0.027	0.6442	0.027	0.89174
0.02852	0.67013	0.02852	0.8382	0.02852	0.75594	0.02852	0.75925		0.02852	0.95182	0.02852	0.70201	0.02852	0.76911	0.02852	0.86724
0.03008	0.65765	0.03008	0.83364	0.03008	0.73062	0.03008	0.69321		0.03008	0.95491	0.03008	0.69657	0.03008	0.99838	0.03008	0.79538
0.03169	0.74314	0.03169	0.81231	0.03169	0.70728	0.03169	0.68266		0.03169	0.96455	0.03169	0.6924	0.03169	0.95853	0.03169	0.77985
0.03333	0.75986	0.03333	0.77995	0.03333	0.71687	0.03333	0.7027		0.03333	0.97819	0.03333	0.6694	0.03333	0.80547	0.03333	0.80982
0.03502	0.69304	0.03502	0.7672	0.03502	0.71002	0.03502	0.67078		0.03502	0.93323	0.03502	0.60654	0.03502	0.85113	0.03502	0.77294
0.03675	0.70144	0.03675	0.80063	0.03675	0.66402	0.03675	0.6373		0.03675	0.93736	0.03675	0.57751	0.03675	0.97838	0.03675	0.73559
0.03852	0.78084	0.03852	0.82594	0.03852	0.6617	0.03852	0.64558		0.03852	0.99079	0.03852	0.5735	0.03852	0.9668	0.03852	0.71104
0.04033	0.86375	0.04033	0.80031	0.04033	0.73432	0.04033	0.68705		0.04033	0.95217	0.04033	0.55785	0.04033	0.83233	0.04033	0.69674
0.04219	0.83419	0.04219	0.80561	0.04219	0.79708	0.04219	0.71293		0.04219	0.87791	0.04219	0.56924	0.04219	0.76295	0.04219	0.76455
0.04408	0.7932	0.04408	0.86382	0.04408	0.81565	0.04408	0.73673		0.04408	0.91227	0.04408	0.586	0.04408	0.84743	0.04408	0.84556
0.04602	0.8695	0.04602	0.8789	0.04602	0.76321	0.04602	0.75696		0.04602	0.94715	0.04602	0.53019	0.04602	0.94019	0.04602	0.7913
0.048	0.92568	0.048	0.87743	0.048	0.76061	0.048	0.79402		0.048	0.93275	0.048	0.48872	0.048	0.90994	0.048	0.73514
0.05002	0.7889	0.05002	0.90281	0.05002	0.87889	0.05002	0.84727		0.05002	0.91708	0.05002	0.49994	0.05002	0.81163	0.05002	0.81466
0.05208	0.70249	0.05208	0.89729	0.05208	0.97188	0.05208	0.87772		0.05208	0.9004	0.05208	0.49491	0.05208	0.74817	0.05208	0.89754
0.05419	0.7956	0.05419	0.88071	0.05419	0.94719	0.05419	0.87992		0.05419	0.8665	0.05419	0.46225	0.05419	0.67849	0.05419	0.91004
0.05633	0.83824	0.05633	0.93678	0.05633	0.94606	0.05633	0.91447		0.05633	0.88165	0.05633	0.46997	0.05633	0.70187	0.05633	0.93402
0.05852	0.74887	0.05852	0.99966	0.05852	0.98558	0.05852	0.96461		0.05852	0.93248	0.05852	0.49755	0.05852	0.80121	0.05852	0.9743
0.06075	0.72164	0.06075	1	0.06075	1	0.06075	1		0.06075	0.91626	0.06075	0.49065	0.06075	0.78431	0.06075	1
0.06302	0.84327	0.06302	0.92671	0.06302	0.97794	0.06302	0.9539		0.06302	0.827	0.06302	0.42049	0.06302	0.75041	0.06302	0.92125
0.06533	0.92104	0.06533	0.84524	0.06533	0.93552	0.06533	0.89039		0.06533	0.8046	0.06533	0.37983	0.06533	0.82842	0.06533	0.86632
0.06769	0.86488	0.06769	0.82591	0.06769	0.91338	0.06769	0.86909		0.06769	0.8896	0.06769	0.40781	0.06769	0.92656	0.06769	0.89123
0.07008	0.88062	0.07008	0.81935	0.07008	0.91191	0.07008	0.84632		0.07008	0.94433	0.07008	0.41367	0.07008	0.87244	0.07008	0.89889
0.07252	0.9849	0.07252	0.73136	0.07252	0.86377	0.07252	0.80268		0.07252	0.91063	0.07252	0.39315	0.07252	0.73762	0.07252	0.84717
0.075	1	0.075	0.66902	0.075	0.80891	0.075	0.75476		0.075	0.91361	0.075	0.38999	0.075	0.73889	0.075	0.7834
0.07752	0.93952	0.07752	0.63779	0.07752	0.73872	0.07752	0.68288		0.07752	0.91021	0.07752	0.37473	0.07752	0.7692	0.07752	0.7536
0.08008	0.92795	0.08008	0.57404	0.08008	0.66986	0.08008	0.61437		0.08008	0.79664	0.08008	0.33837	0.08008	0.73646	0.08008	0.69543
0.08269	0.92549	0.08269	0.50623	0.08269	0.63527	0.08269	0.55889		0.08269	0.73776	0.08269	0.29189	0.08269	0.72145	0.08269	0.60372
0.08533	0.86959	0.08533	0.46205	0.08533	0.61754	0.08533	0.52766		0.08533	0.85699	0.08533	0.27273	0.08533	0.74499	0.08533	0.54736
0.08802	0.83931	0.08802	0.43011	0.08802	0.57184	0.08802	0.50555		0.08802	0.89175	0.08802	0.30335	0.08802	0.75375	0.08802	0.52224
0.09075	0.83391	0.09075	0.4069	0.09075	0.51165	0.09075	0.47521		0.09075	0.79753	0.09075	0.32158	0.09075	0.80775	0.09075	0.51353
0.09352	0.79564	0.09352	0.40001	0.09352	0.49558	0.09352	0.43993		0.09352	0.76846	0.09352	0.26276	0.09352	0.79089	0.09352	0.48262
0.09633	0.79149	0.09633	0.36453	0.09633	0.48542	0.09633	0.41258		0.09633	0.77322	0.09633	0.20622	0.09633	0.67566	0.09633	0.43951
0.09919	0.78291	0.09919	0.30541	0.09919	0.43795	0.09919	0.40064		0.09919	0.73858	0.09919	0.23462	0.09919	0.61695	0.09919	0.42462
0.10208	0.71616	0.10208	0.28591	0.10208	0.43805	0.10208	0.38401		0.10208	0.70664	0.10208	0.25574	0.10208	0.65013	0.10208	0.42691
0.10502	0.6818	0.10502	0.26909	0.10502	0.43702	0.10502	0.35713		0.10502	0.69134	0.10502	0.20826	0.10502	0.69875	0.10502	0.42305
0.108	0.70334	0.108	0.24916	0.108	0.39384	0.108	0.34968		0.108	0.72949	0.108	0.19138	0.108	0.6107	0.108	0.41769
0.11102	0.68459	0.11102	0.27452	0.11102	0.40447	0.11102	0.35745		0.11102	0.75262	0.11102	0.2425	0.11102	0.52109	0.11102	0.39246
0.11408	0.64287	0.11408	0.29271	0.11408	0.41616	0.11408	0.36068		0.11408	0.74174	0.11408	0.24028	0.11408	0.60258	0.11408	0.37528
0.11719	0.62017	0.11719	0.25213	0.11719	0.37698	0.11719	0.33743		0.11719	0.68939	0.11719	0.18097	0.11719	0.6023	0.11719	0.38389
0.12033	0.58997	0.12033	0.21903	0.12033	0.36237	0.12033	0.31342		0.12033	0.68279	0.12033	0.17346	0.12033	0.47869	0.12033	0.37225
0.12352	0.57877	0.12352	0.22861	0.12352	0.35923	0.12352	0.31149		0.12352	0.74206	0.12352	0.20102	0.12352	0.48191	0.12352	0.34212
0.12675	0.62691	0.12675	0.23106	0.12675	0.33209	0.12675	0.29687		0.12675	0.73422	0.12675	0.20513	0.12675	0.58825	0.12675	0.34072
0.13002	0.64571	0.13002	0.21718	0.13002	0.31021	0.13002	0.27185		0.13002	0.66752	0.13002	0.19167	0.13002	0.61292	0.13002	0.35917
0.13333	0.59495	0.13333	0.21664	0.13333	0.33278	0.13333	0.27555		0.13333	0.71226	0.13333	0.19211	0.13333	0.54494	0.13333	0.34574
0.13669	0.57924	0.13669	0.20557	0.13669	0.3472	0.13669	0.27543		0.13669	0.75798	0.13669	0.19055	0.13669	0.523	0.13669	0.32286
0.14008	0.60455	0.14008	0.17907	0.14008	0.3257	0.14008	0.25956		0.14008	0.6754	0.14008	0.17778	0.14008	0.53731	0.14008	0.31851
0.14352	0.58271	0.14352	0.16252	0.14352	0.27867	0.14352	0.23708		0.14352	0.61371	0.14352	0.16787	0.14352	0.50778	0.14352	0.29089
0.147	0.53924	0.147	0.16504	0.147	0.24332	0.147	0.22469		0.147	0.62687	0.147	0.17622	0.147	0.48821	0.147	0.27263
0.15052	0.51165	0.15052	0.1607	0.15052	0.24873	0.15052	0.22594		0.15052	0.63723	0.15052	0.17589	0.15052	0.47853	0.15052	0.29861
0.15408	0.51438	0.15408	0.14693	0.15408	0.26458	0.15408	0.22011		0.15408	0.65054	0.15408	0.14868	0.15408	0.51215	0.15408	0.30064
0.15769	0.53419	0.15769	0.15171	0.15769	0.26322	0.15769	0.20985		0.15769	0.66084	0.15769	0.13599	0.15769	0.56297	0.15769	0.2617
0.16133	0.52094	0.16133	0.15691	0.16133	0.24898	0.16133	0.19615		0.16133	0.64661	0.16133	0.138	0.16133	0.51116	0.16133	0.23438
0.16502	0.47471	0.16502	0.13216	0.16502	0.22936	0.16502	0.17695		0.16502	0.62792	0.16502	0.13605	0.16502	0.45061	0.16502	0.22851
0.16875	0.4885	0.16875	0.1099	0.16875	0.19835	0.16875	0.16304		0.16875	0.6196	0.16875	0.13651	0.16875	0.53232	0.16875	0.23176
0.17252	0.4987	0.17252	0.10406	0.17252	0.17426	0.17252	0.14905		0.17252	0.61309	0.17252	0.12717	0.17252	0.53634	0.17252	0.22245
0.17633	0.4784	0.17633	0.10131	0.17633	0.18938	0.17633	0.1333		0.17633	0.64084	0.17633	0.11128	0.17633	0.43111	0.17633	0.22033
0.18019	0.4852	0.18019	0.10708	0.18019	0.20397	0.18019	0.12154		0.18019	0.66117	0.18019	0.10848	0.18019	0.41248	0.18019	0.22201
0.18408	0.4854	0.18408	0.10738	0.18408	0.18109	0.18408	0.11866		0.18408	0.66187	0.18408	0.11765	0.18408	0.44349	0.18408	0.19982
0.18802	0.46915	0.18802	0.10891	0.18802	0.15852	0.18802	0.11833		0.18802	0.63843	0.18802	0.10931	0.18802	0.43097	0.18802	0.17976
0.192	0.47245	0.192	0.12254	0.192	0.15117	0.192	0.11482		0.192	0.59749	0.192	0.09808	0.192	0.38583	0.192	0.18878
0.19602	0.45072	0.19602	0.10179	0.19602	0.1556	0.19602	0.11084		0.19602	0.59762	0.19602	0.09905	0.19602	0.34193	0.19602	0.19784
0.20008	0.42609	0.20008	0.07287	0.20008	0.15858	0.20008	0.10128		0.20008	0.61325	0.20008	0.10304	0.20008	0.31766	0.20008	0.16986
0.20419	0.41984	0.20419	0.08341	0.20419	0.13268	0.20419	0.08851		0.20419	0.59854	0.20419	0.10403	0.20419	0.34309	0.20419	0.13225
0.20833	0.40925	0.20833	0.08049	0.20833	0.10153	0.20833	0.08128		0.20833	0.55955	0.20833	0.10038	0.20833	0.39063	0.20833	0.13721
0.21252	0.38202	0.21252	0.06663	0.21252	0.10487	0.21252	0.07917		0.21252	0.53338	0.21252	0.09729	0.21252	0.387	0.21252	0.14969
0.21675	0.37006	0.21675	0.0763	0.21675	0.12052	0.21675	0.08139		0.21675	0.53673	0.21675	0.08054	0.21675	0.36484	0.21675	0.12906
0.22102	0.37132	0.22102	0.07281	0.22102	0.11373	0.22102	0.07791		0.22102	0.4933	0.22102	0.05454	0.22102	0.38026	0.22102	0.11468
0.22533	0.3593	0.22533	0.04833	0.22533	0.09513	0.22533	0.06801		0.22533	0.45934	0.22533	0.05241	0.22533	0.36667	0.22533	0.11281
0.22969	0.33176	0.22969	0.04479	0.22969	0.0918	0.22969	0.05798		0.22969	0.48674	0.22969	0.06942	0.22969	0.31917	0.22969	0.10951
0.23408	0.29643	0.23408	0.06467	0.23408	0.10613	0.23408	0.05106		0.23408	0.51955	0.23408	0.07883	0.23408	0.31179	0.23408	0.10837
0.23852	0.31232	0.23852	0.06959	0.23852	0.10645	0.23852	0.05459		0.23852	0.51638	0.23852	0.07069	0.23852	0.32678	0.23852	0.1071
0.243	0.35931	0.243	0.05552	0.243	0.09576	0.243	0.06743		0.243	0.49602	0.243	0.07196	0.243	0.30934	0.243	0.11911
0.24752	0.3497	0.24752	0.05167	0.24752	0.09616	0.24752	0.06834		0.24752	0.50494	0.24752	0.08204	0.24752	0.29267	0.24752	0.12801
0.25208	0.32669	0.25208	0.05367	0.25208	0.10338	0.25208	0.05745		0.25208	0.51885	0.25208	0.06335	0.25208	0.30911	0.25208	0.11566
0.25669	0.33627	0.25669	0.05286	0.25669	0.10389	0.25669	0.05152		0.25669	0.51764	0.25669	0.04083	0.25669	0.2783	0.25669	0.10181
0.26133	0.32109	0.26133	0.05163	0.26133	0.08526	0.26133	0.04838		0.26133	0.52857	0.26133	0.03985	0.26133	0.26309	0.26133	0.09498
0.26602	0.28947	0.26602	0.04504	0.26602	0.05812	0.26602	0.04314		0.26602	0.50038	0.26602	0.0498	0.26602	0.32947	0.26602	0.09739
0.27075	0.30484	0.27075	0.04419	0.27075	0.04843	0.27075	0.0422		0.27075	0.46826	0.27075	0.04967	0.27075	0.34743	0.27075	0.10634
0.27552	0.31962	0.27552	0.0471	0.27552	0.0655	0.27552	0.04471		0.27552	0.4944	0.27552	0.047	0.27552	0.29947	0.27552	0.10221
0.28033	0.30409	0.28033	0.04056	0.28033	0.08484	0.28033	0.04523		0.28033	0.53307	0.28033	0.05703	0.28033	0.29806	0.28033	0.09186
0.28519	0.29471	0.28519	0.03133	0.28519	0.0851	0.28519	0.04343		0.28519	0.52149	0.28519	0.06023	0.28519	0.28662	0.28519	0.0977
0.29008	0.30474	0.29008	0.0329	0.29008	0.07546	0.29008	0.04055		0.29008	0.48785	0.29008	0.05238	0.29008	0.26807	0.29008	0.10977
0.29502	0.31168	0.29502	0.04021	0.29502	0.06546	0.29502	0.03852		0.29502	0.48694	0.29502	0.04924	0.29502	0.30664	0.29502	0.11141
0.3	0.30625	0.3	0.03834	0.3	0.06811	0.3	0.03975		0.3	0.52231	0.3	0.04719	0.3	0.33109	0.3	0.10856
0.30502	0.32616	0.30502	0.03295	0.30502	0.07821	0.30502	0.03679		0.30502	0.52854	0.30502	0.04539	0.30502	0.31658	0.30502	0.11416
0.31008	0.38439	0.31008	0.03534	0.31008	0.07252	0.31008	0.0323		0.31008	0.46644	0.31008	0.04553	0.31008	0.33931	0.31008	0.10918
0.31519	0.37176	0.31519	0.04324	0.31519	0.05934	0.31519	0.03386		0.31519	0.45891	0.31519	0.04945	0.31519	0.35371	0.31519	0.08869
0.32033	0.29678	0.32033	0.04908	0.32033	0.06126	0.32033	0.03766		0.32033	0.51573	0.32033	0.05075	0.32033	0.28913	0.32033	0.09185
0.32552	0.29686	0.32552	0.04348	0.32552	0.06811	0.32552	0.03436		0.32552	0.50214	0.32552	0.03638	0.32552	0.25805	0.32552	0.09703
0.33075	0.36173	0.33075	0.02841	0.33075	0.06485	0.33075	0.0279		0.33075	0.44755	0.33075	0.02666	0.33075	0.33671	0.33075	0.09317
0.33602	0.36144	0.33602	0.02519	0.33602	0.05129	0.33602	0.03042		0.33602	0.42864	0.33602	0.03815	0.33602	0.36264	0.33602	0.09952
0.34133	0.30133	0.34133	0.0328	0.34133	0.04571	0.34133	0.03471		0.34133	0.45363	0.34133	0.05085	0.34133	0.29558	0.34133	0.09631
0.34669	0.29615	0.34669	0.04031	0.34669	0.05139	0.34669	0.02854		0.34669	0.46033	0.34669	0.0505	0.34669	0.25487	0.34669	0.09009
0.35208	0.3246	0.35208	0.03375	0.35208	0.05932	0.35208	0.02652		0.35208	0.43401	0.35208	0.03383	0.35208	0.3024	0.35208	0.09024
0.35752	0.32294	0.35752	0.01882	0.35752	0.06031	0.35752	0.02998		0.35752	0.4124	0.35752	0.02967	0.35752	0.31088	0.35752	0.09019
0.363	0.31526	0.363	0.01713	0.363	0.04293	0.363	0.02848		0.363	0.41241	0.363	0.04787	0.363	0.23607	0.363	0.08006
0.36852	0.32299	0.36852	0.01831	0.36852	0.03153	0.36852	0.02951		0.36852	0.42248	0.36852	0.05392	0.36852	0.24682	0.36852	0.07415
0.37408	0.32811	0.37408	0.01882	0.37408	0.04067	0.37408	0.03055		0.37408	0.41482	0.37408	0.04924	0.37408	0.32661	0.37408	0.0834
0.37969	0.3275	0.37969	0.02407	0.37969	0.04602	0.37969	0.02641		0.37969	0.40209	0.37969	0.04849	0.37969	0.33849	0.37969	0.08593
0.38533	0.36094	0.38533	0.0267	0.38533	0.04848	0.38533	0.02135		0.38533	0.39957	0.38533	0.03927	0.38533	0.28858	0.38533	0.08328
0.39102	0.3692	0.39102	0.02392	0.39102	0.05393	0.39102	0.01962		0.39102	0.38652	0.39102	0.01356	0.39102	0.22928	0.39102	0.07852
0.39675	0.33402	0.39675	0.01785	0.39675	0.04661	0.39675	0.02201		0.39675	0.36611	0.39675	0.01185	0.39675	0.22344	0.39675	0.07981
0.40252	0.32875	0.40252	0.01129	0.40252	0.0372	0.40252	0.02399		0.40252	0.34348	0.40252	0.03091	0.40252	0.29059	0.40252	0.08397
0.40833	0.38128	0.40833	0.01248	0.40833	0.03669	0.40833	0.0221		0.40833	0.33479	0.40833	0.02777	0.40833	0.33966	0.40833	0.07688
0.41419	0.4231	0.41419	0.02619	0.41419	0.04075	0.41419	0.01947		0.41419	0.34068	0.41419	0.02782	0.41419	0.31649	0.41419	0.07072
0.42008	0.39775	0.42008	0.03123	0.42008	0.0494	0.42008	0.01947		0.42008	0.3215	0.42008	0.04391	0.42008	0.27325	0.42008	0.07628
0.42602	0.36616	0.42602	0.0178	0.42602	0.04019	0.42602	0.02129		0.42602	0.2761	0.42602	0.0274	0.42602	0.26551	0.42602	0.08222
0.432	0.35753	0.432	0.01512	0.432	0.02357	0.432	0.02074		0.432	0.27397	0.432	0	0.432	0.28412	0.432	0.07093
0.43802	0.36708	0.43802	0.02057	0.43802	0.02625	0.43802	0.01739		0.43802	0.29721	0.43802	0.00949	0.43802	0.25244	0.43802	0.06762
0.44408	0.38858	0.44408	0.02619	0.44408	0.03823	0.44408	0.02071		0.44408	0.29676	0.44408	0.04463	0.44408	0.24134	0.44408	0.08224
0.45019	0.39005	0.45019	0.02871	0.45019	0.03922	0.45019	0.02355		0.45019	0.28008	0.45019	0.04128	0.45019	0.32433	0.45019	0.08429
0.45633	0.4121	0.45633	0.01321	0.45633	0.03554	0.45633	0.02036		0.45633	0.26735	0.45633	0.02399	0.45633	0.35454	0.45633	0.07007
0.46252	0.42195	0.46252	0.00117	0.46252	0.04264	0.46252	0.01953		0.46252	0.25624	0.46252	0.03027	0.46252	0.28591	0.46252	0.06001
0.46875	0.42177	0.46875	0.01451	0.46875	0.03988	0.46875	0.01897		0.46875	0.23632	0.46875	0.03584	0.46875	0.24905	0.46875	0.06338
0.47502	0.42851	0.47502	0.02834	0.47502	0.03208	0.47502	0.01803		0.47502	0.23134	0.47502	0.02445	0.47502	0.24934	0.47502	0.06533
0.48133	0.4125	0.48133	0.01571	0.48133	0.0281	0.48133	0.0185		0.48133	0.22784	0.48133	0.02664	0.48133	0.26012	0.48133	0.06473
0.48769	0.39947	0.48769	0.00339	0.48769	0.02331	0.48769	0.01573		0.48769	0.20528	0.48769	0.04045	0.48769	0.26707	0.48769	0.07274
0.49408	0.42716	0.49408	0.01228	0.49408	0.02469	0.49408	0.01503		0.49408	0.19505	0.49408	0.02971	0.49408	0.25193	0.49408	0.07468
0.50052	0.48426	0.50052	0.01557	0.50052	0.03687	0.50052	0.01909		0.50052	0.19364	0.50052	0.02166	0.50052	0.25896	0.50052	0.06676
0.507	0.5142	0.507	0.01688	0.507	0.04816	0.507	0.02086		0.507	0.1871	0.507	0.03715	0.507	0.27732	0.507	0.06732
0.51352	0.49701	0.51352	0.02415	0.51352	0.03953	0.51352	0.01709		0.51352	0.1802	0.51352	0.03356	0.51352	0.26023	0.51352	0.07071
0.52008	0.50392	0.52008	0.01667	0.52008	0.02584	0.52008	0.01348		0.52008	0.16958	0.52008	0.0109	0.52008	0.24022	0.52008	0.06648
0.52669	0.49532	0.52669	0.01537	0.52669	0.0176	0.52669	0.0156		0.52669	0.14905	0.52669	0.00916	0.52669	0.25183	0.52669	0.06135
0.53333	0.47747	0.53333	0.02571	0.53333	0.02344	0.53333	0.0184		0.53333	0.13081	0.53333	0.01696	0.53333	0.26817	0.53333	0.069
0.54002	0.51104	0.54002	0.02319	0.54002	0.04395	0.54002	0.01961		0.54002	0.12649	0.54002	0.02479	0.54002	0.26231	0.54002	0.07902
0.54675	0.56012	0.54675	0.01191	0.54675	0.05046	0.54675	0.01763		0.54675	0.12581	0.54675	0.03867	0.54675	0.27203	0.54675	0.07253
0.55352	0.55875	0.55352	0.0124	0.55352	0.03574	0.55352	0.01502		0.55352	0.11391	0.55352	0.03703	0.55352	0.30596	0.55352	0.06934
0.56033	0.5044	0.56033	0.02093	0.56033	0.02268	0.56033	0.01771		0.56033	0.09989	0.56033	0.02184	0.56033	0.30722	0.56033	0.07847
0.56719	0.51148	0.56719	0.0085	0.56719	0.02567	0.56719	0.01733		0.56719	0.09026	0.56719	0.02225	0.56719	0.28119	0.56719	0.07704
0.57408	0.57526	0.57408	1.76201e-50	0.57408	0.03334	0.57408	0.0137		0.57408	0.08102	0.57408	0.03899	0.57408	0.28146	0.57408	0.0635
0.58102	0.59404	0.58102	0.01031	0.58102	0.03127	0.58102	0.01319		0.58102	0.07426	0.58102	0.03468	0.58102	0.29251	0.58102	0.05729
0.588	0.57279	0.588	0.0213	0.588	0.02207	0.588	0.01707		0.588	0.0735	0.588	0.01187	0.588	0.26875	0.588	0.06164
0.59502	0.56366	0.59502	0.01723	0.59502	0.03094	0.59502	0.01963		0.59502	0.0662	0.59502	0.00838	0.59502	0.27515	0.59502	0.06189
0.60208	0.58474	0.60208	0.00699	0.60208	0.03431	0.60208	0.01796		0.60208	0.05718	0.60208	0.00837	0.60208	0.35252	0.60208	0.06345
0.60919	0.58501	0.60919	0.0124	0.60919	0.03141	0.60919	0.01561		0.60919	0.05541	0.60919	0.00702	0.60919	0.377	0.60919	0.06689
0.61633	0.59622	0.61633	0.02046	0.61633	0.03736	0.61633	0.01609		0.61633	0.04729	0.61633	0.02323	0.61633	0.35182	0.61633	0.05279
0.62352	0.62091	0.62352	0.00858	0.62352	0.03296	0.62352	0.01636		0.62352	0.03607	0.62352	0.03128	0.62352	0.34734	0.62352	0.04635
0.63075	0.61302	0.63075	1.76201e-50	0.63075	0.02102	0.63075	0.01451		0.63075	0.0321	0.63075	0.02342	0.63075	0.35048	0.63075	0.05986
0.63802	0.60022	0.63802	0.000331397	0.63802	0.0272	0.63802	0.01526		0.63802	0.03656	0.63802	0.01987	0.63802	0.3451	0.63802	0.06279
0.64533	0.62253	0.64533	0.01999	0.64533	0.04214	0.64533	0.01671		0.64533	0.04043	0.64533	0.02591	0.64533	0.32503	0.64533	0.0614
0.65269	0.65676	0.65269	0.02289	0.65269	0.02319	0.65269	0.01715		0.65269	0.03413	0.65269	0.0386	0.65269	0.34317	0.65269	0.06764
0.66008	0.67853	0.66008	0.00194	0.66008	0.00904	0.66008	0.01781		0.66008	0.02602	0.66008	0.04333	0.66008	0.39676	0.66008	0.07002
0.66752	0.68521	0.66752	0.00279	0.66752	0.04435	0.66752	0.01867		0.66752	0.02311	0.66752	0.03171	0.66752	0.3745	0.66752	0.06586
0.675	0.66084	0.675	0.0196	0.675	0.05877	0.675	0.01889		0.675	0.02181	0.675	0.02974	0.675	0.26715	0.675	0.06149
0.68252	0.63765	0.68252	0.02054	0.68252	0.02824	0.68252	0.01998		0.68252	0.01911	0.68252	0.03676	0.68252	0.23519	0.68252	0.06328
0.69008	0.66351	0.69008	0.0109	0.69008	0.0282	0.69008	0.01813		0.69008	0.01643	0.69008	0.02871	0.69008	0.31666	0.69008	0.06134
0.69769	0.66847	0.69769	0.00977	0.69769	0.04623	0.69769	0.01368		0.69769	0.01753	0.69769	0.01917	0.69769	0.35082	0.69769	0.05804
0.70533	0.62525	0.70533	0.01286	0.70533	0.0305	0.70533	0.01515		0.70533	0.01721	0.70533	0.02786	0.70533	0.30725	0.70533	0.05962
0.71302	0.61257	0.71302	0.01199	0.71302	0.02283	0.71302	0.01706		0.71302	0.01156	0.71302	0.04948	0.71302	0.31396	0.71302	0.05518
0.72075	0.62624	0.72075	0.00598	0.72075	0.03478	0.72075	0.01487		0.72075	0.01223	0.72075	0.04679	0.72075	0.39066	0.72075	0.0513
0.72852	0.62251	0.72852	0.00691	0.72852	0.03363	0.72852	0.01259		0.72852	0.0192	0.72852	0.02707	0.72852	0.39337	0.72852	0.05394
0.73633	0.62398	0.73633	0.01023	0.73633	0.03334	0.73633	0.01159		0.73633	0.01574	0.73633	0.03433	0.73633	0.32428	0.73633	0.05224
0.74419	0.62172	0.74419	0.00542	0.74419	0.03672	0.74419	0.01434		0.74419	0.00869	0.74419	0.05042	0.74419	0.33409	0.74419	0.04666
0.75208	0.59286	0.75208	0.00807	0.75208	0.03556	0.75208	0.01871		0.75208	0.01038	0.75208	0.04901	0.75208	0.3792	0.75208	0.04741
0.76002	0.54882	0.76002	0.01402	0.76002	0.03946	0.76002	0.01786		0.76002	0.01411	0.76002	0.04494	0.76002	0.35211	0.76002	0.05628
0.768	0.5411	0.768	0.0114	0.768	0.0426	0.768	0.01382		0.768	0.01401	0.768	0.05456	0.768	0.35273	0.768	0.05701
0.77602	0.53822	0.77602	0.00957	0.77602	0.03299	0.77602	0.0121		0.77602	0.01016	0.77602	0.05538	0.77602	0.40889	0.77602	0.04943
0.78408	0.51138	0.78408	0.00849	0.78408	0.02791	0.78408	0.0132		0.78408	0.00671	0.78408	0.04059	0.78408	0.40597	0.78408	0.04829
0.79219	0.48445	0.79219	0.00521	0.79219	0.03082	0.79219	0.01533		0.79219	0.00575	0.79219	0.03553	0.79219	0.37712	0.79219	0.04788
0.80033	0.47478	0.80033	1.76201e-50	0.80033	0.03814	0.80033	0.01678		0.80033	0.00819	0.80033	0.04452	0.80033	0.4069	0.80033	0.04664
0.80852	0.47765	0.80852	1.76201e-50	0.80852	0.03554	0.80852	0.01538		0.80852	0.01148	0.80852	0.05276	0.80852	0.45608	0.80852	0.04955
0.81675	0.46727	0.81675	0.01039	0.81675	0.02576	0.81675	0.01256		0.81675	0.01016	0.81675	0.05249	0.81675	0.47949	0.81675	0.05112
0.82502	0.42082	0.82502	0.01318	0.82502	0.03587	0.82502	0.01143		0.82502	0.00578	0.82502	0.04718	0.82502	0.44911	0.82502	0.04771
0.83333	0.37772	0.83333	0.00617	0.83333	0.04639	0.83333	0.01364		0.83333	0.00582	0.83333	0.05857	0.83333	0.38756	0.83333	0.05115
0.84169	0.37282	0.84169	1.76201e-50	0.84169	0.0386	0.84169	0.01559		0.84169	0.00801	0.84169	0.08028	0.84169	0.40151	0.84169	0.05179
0.85008	0.37194	0.85008	1.76201e-50	0.85008	0.03741	0.85008	0.01492		0.85008	0.01025	0.85008	0.07587	0.85008	0.46685	0.85008	0.04353
0.85852	0.3449	0.85852	0.01225	0.85852	0.04131	0.85852	0.01274		0.85852	0.01092	0.85852	0.07046	0.85852	0.45789	0.85852	0.04552
0.867	0.31218	0.867	0.01717	0.867	0.04233	0.867	0.01156		0.867	0.0091	0.867	0.08192	0.867	0.42205	0.867	0.05699
0.87552	0.29185	0.87552	0.00956	0.87552	0.04305	0.87552	0.01259		0.87552	0.01006	0.87552	0.08225	0.87552	0.41541	0.87552	0.05774
0.88408	0.27998	0.88408	0.00938	0.88408	0.03297	0.88408	0.01397		0.88408	0.01178	0.88408	0.08541	0.88408	0.43373	0.88408	0.04635
0.89269	0.25122	0.89269	0.01193	0.89269	0.0281	0.89269	0.01506		0.89269	0.00687	0.89269	0.10317	0.89269	0.44266	0.89269	0.04111
0.90133	0.22139	0.90133	0.00684	0.90133	0.04055	0.90133	0.016		0.90133	0.00339	0.90133	0.11524	0.90133	0.41616	0.90133	0.04033
0.91002	0.21262	0.91002	0.00417	0.91002	0.04553	0.91002	0.01446		0.91002	0.00697	0.91002	0.10429	0.91002	0.43921	0.91002	0.03825
0.91875	0.19643	0.91875	0.00325	0.91875	0.03405	0.91875	0.01217		0.91875	0.00875	0.91875	0.07976	0.91875	0.53092	0.91875	0.04315
0.92752	0.16627	0.92752	0.0084	0.92752	0.03444	0.92752	0.0132		0.92752	0.00814	0.92752	0.06837	0.92752	0.54989	0.92752	0.04844
0.93633	0.14507	0.93633	0.0203	0.93633	0.04698	0.93633	0.01393		0.93633	0.0093	0.93633	0.08909	0.93633	0.5087	0.93633	0.04676
0.94519	0.13458	0.94519	0.0153	0.94519	0.036	0.94519	0.01116		0.94519	0.00924	0.94519	0.11101	0.94519	0.51797	0.94519	0.04317
0.95408	0.1235	0.95408	0.00227	0.95408	0.02548	0.95408	0.00921		0.95408	0.0069	0.95408	0.11213	0.95408	0.54091	0.95408	0.04156
0.96302	0.10385	0.96302	0.00933	0.96302	0.04143	0.96302	0.01069		0.96302	0.00617	0.96302	0.12136	0.96302	0.5461	0.96302	0.04008
0.972	0.08597	0.972	0.01881	0.972	0.05023	0.972	0.01164		0.972	0.00676	0.972	0.13148	0.972	0.54794	0.972	0.04563
0.98102	0.07484	0.98102	0.01726	0.98102	0.05148	0.98102	0.01141		0.98102	0.00475	0.98102	0.14217	0.98102	0.53788	0.98102	0.04633
0.99008	0.06023	0.99008	0.01883	0.99008	0.04891	0.99008	0.01068		0.99008	0.00268	0.99008	0.14897	0.99008	0.53796	0.99008	0.03688
0.99919	0.04824	0.99919	0.01815	0.99919	0.0356	0.99919	0.00943		0.99919	0.00493	0.99919	0.11924	0.99919	0.53912	0.99919	0.0403
1.00833	0.04716	1.00833	0.01187	1.00833	0.03267	1.00833	0.01151		1.00833	0.00923	1.00833	0.10694	1.00833	0.54314	1.00833	0.04758
1.01752	0.04539	1.01752	0.00826	1.01752	0.04373	1.01752	0.01351		1.01752	0.00959	1.01752	0.14116	1.01752	0.5605	1.01752	0.04339
1.02675	0.03718	1.02675	0.00995	1.02675	0.0543	1.02675	0.01294		1.02675	0.00794	1.02675	0.16311	1.02675	0.57522	1.02675	0.04029
1.03602	0.02884	1.03602	0.01544	1.03602	0.04993	1.03602	0.01352		1.03602	0.00727	1.03602	0.15483	1.03602	0.58146	1.03602	0.04323
1.04533	0.0236	1.04533	0.01964	1.04533	0.03982	1.04533	0.01246		1.04533	0.00568	1.04533	0.14848	1.04533	0.60975	1.04533	0.04543
1.05469	0.0182	1.05469	0.02054	1.05469	0.03933	1.05469	0.00969		1.05469	0.00545	1.05469	0.14263	1.05469	0.61266	1.05469	0.04664
1.06408	0.01529	1.06408	0.01768	1.06408	0.04161	1.06408	0.01229		1.06408	0.00649	1.06408	0.14221	1.06408	0.61118	1.06408	0.04283
1.07352	0.01382	1.07352	0.01785	1.07352	0.0462	1.07352	0.01554		1.07352	0.00679	1.07352	0.1462	1.07352	0.6191	1.07352	0.03292
1.083	0.01254	1.083	0.02857	1.083	0.05803	1.083	0.01264		1.083	0.00681	1.083	0.14515	1.083	0.59525	1.083	0.02837
1.09252	0.01163	1.09252	0.03562	1.09252	0.05939	1.09252	0.00912		1.09252	0.00641	1.09252	0.15036	1.09252	0.60899	1.09252	0.03355
1.10208	0.01003	1.10208	0.02142	1.10208	0.05056	1.10208	0.00982		1.10208	0.00551	1.10208	0.15742	1.10208	0.64779	1.10208	0.04013
1.11169	0.00898	1.11169	0.00966	1.11169	0.05285	1.11169	0.01132		1.11169	0.0066	1.11169	0.16014	1.11169	0.66037	1.11169	0.03946
1.12133	0.00775	1.12133	0.01705	1.12133	0.0576	1.12133	0.01364		1.12133	0.00775	1.12133	0.17121	1.12133	0.6634	1.12133	0.0401
1.13102	0.00613	1.13102	0.02175	1.13102	0.06686	1.13102	0.01388		1.13102	0.0062	1.13102	0.17202	1.13102	0.64778	1.13102	0.03763
1.14075	0.00619	1.14075	0.01769	1.14075	0.07038	1.14075	0.00894		1.14075	0.00393	1.14075	0.15691	1.14075	0.62284	1.14075	0.03387
1.15052	0.00642	1.15052	0.02762	1.15052	0.05908	1.15052	0.00747		1.15052	0.00434	1.15052	0.14222	1.15052	0.62922	1.15052	0.03676
1.16033	0.00535	1.16033	0.04781	1.16033	0.04872	1.16033	0.01235		1.16033	0.00615	1.16033	0.14968	1.16033	0.64027	1.16033	0.04056
1.17019	0.0052	1.17019	0.04654	1.17019	0.04714	1.17019	0.01377		1.17019	0.00533	1.17019	0.18175	1.17019	0.64073	1.17019	0.03921
1.18008	0.00545	1.18008	0.02433	1.18008	0.05618	1.18008	0.01124		1.18008	0.00367	1.18008	0.1857	1.18008	0.68622	1.18008	0.0369
1.19002	0.00519	1.19002	0.01862	1.19002	0.0571	1.19002	0.00975		1.19002	0.00449	1.19002	0.15517	1.19002	0.71581	1.19002	0.03758
1.2	0.00516	1.2	0.02557	1.2	0.05192	1.2	0.00816		1.2	0.00478	1.2	0.14289	1.2	0.68891	1.2	0.03623
1.21002	0.00407	1.21002	0.03658	1.21002	0.0545	1.21002	0.00969		1.21002	0.00475	1.21002	0.16079	1.21002	0.66117	1.21002	0.03084
1.22008	0.00369	1.22008	0.04576	1.22008	0.05483	1.22008	0.0114		1.22008	0.0061	1.22008	0.16481	1.22008	0.64259	1.22008	0.02868
1.23019	0.00466	1.23019	0.04268	1.23019	0.06395	1.23019	0.01014		1.23019	0.00633	1.23019	0.14616	1.23019	0.62783	1.23019	0.03326
1.24033	0.00365	1.24033	0.04045	1.24033	0.07238	1.24033	0.01212		1.24033	0.00581	1.24033	0.13918	1.24033	0.66056	1.24033	0.03457
1.25052	0.00291	1.25052	0.03919	1.25052	0.06234	1.25052	0.01249		1.25052	0.00604	1.25052	0.14775	1.25052	0.70016	1.25052	0.0299
1.26075	0.00492	1.26075	0.03637	1.26075	0.06281	1.26075	0.00966		1.26075	0.00503	1.26075	0.14996	1.26075	0.6965	1.26075	0.02661
1.27102	0.00522	1.27102	0.03699	1.27102	0.07839	1.27102	0.0106		1.27102	0.00224	1.27102	0.14514	1.27102	0.67514	1.27102	0.02788
1.28133	0.00279	1.28133	0.04293	1.28133	0.07708	1.28133	0.01147		1.28133	0.00178	1.28133	0.13851	1.28133	0.69002	1.28133	0.03354
1.29169	0.00149	1.29169	0.04572	1.29169	0.06654	1.29169	0.00929		1.29169	0.00336	1.29169	0.13333	1.29169	0.70819	1.29169	0.03431
1.30208	0.00161	1.30208	0.03805	1.30208	0.07591	1.30208	0.00985		1.30208	0.004	1.30208	0.13363	1.30208	0.70618	1.30208	0.0316
1.31252	0.00245	1.31252	0.03811	1.31252	0.07544	1.31252	0.01201		1.31252	0.00259	1.31252	0.12098	1.31252	0.70118	1.31252	0.03161
1.323	0.00325	1.323	0.04204	1.323	0.06569	1.323	0.01215		1.323	0.000705162	1.323	0.11498	1.323	0.67934	1.323	0.02758
1.33352	0.00284	1.33352	0.04743	1.33352	0.06983	1.33352	0.01213		1.33352	0.00146	1.33352	0.12397	1.33352	0.66092	1.33352	0.02649
1.34408	0.00252	1.34408	0.06163	1.34408	0.07095	1.34408	0.01123		1.34408	0.00247	1.34408	0.11608	1.34408	0.68618	1.34408	0.03341
1.35469	0.00251	1.35469	0.0601	1.35469	0.07567	1.35469	0.01195		1.35469	0.00203	1.35469	0.10464	1.35469	0.67701	1.35469	0.03576
1.36533	0.00218	1.36533	0.04462	1.36533	0.08272	1.36533	0.01324		1.36533	0.00184	1.36533	0.10826	1.36533	0.63653	1.36533	0.03251
1.37602	0.00104	1.37602	0.05069	1.37602	0.08717	1.37602	0.0123		1.37602	0.00209	1.37602	0.1045	1.37602	0.63394	1.37602	0.02786
1.38675	0.00116	1.38675	0.05884	1.38675	0.08586	1.38675	0.01145		1.38675	0.00176	1.38675	0.08992	1.38675	0.63589	1.38675	0.02559
1.39752	0.00255	1.39752	0.05409	1.39752	0.08011	1.39752	0.01023		1.39752	0.00147	1.39752	0.07739	1.39752	0.66228	1.39752	0.02491
1.40833	0.00212	1.40833	0.05543	1.40833	0.07751	1.40833	0.01099		1.40833	0.00176	1.40833	0.07974	1.40833	0.68812	1.40833	0.02593
1.41919	0.000757086	1.41919	0.04978	1.41919	0.06479	1.41919	0.01109		1.41919	0.00106	1.41919	0.07563	1.41919	0.66063	1.41919	0.02513
1.43008	0.000486417	1.43008	0.04448	1.43008	0.06541	1.43008	0.00799		1.43008	0.0001447	1.43008	0.06016	1.43008	0.64879	1.43008	0.02025
1.44102	0.000154313	1.44102	0.05967	1.44102	0.07993	1.44102	0.00674		1.44102	0.000510669	1.44102	0.05674	1.44102	0.64885	1.44102	0.01959
1.452	0	1.452	0.07255	1.452	0.07921	1.452	0.00944		1.452	0.00122	1.452	0.05636	1.452	0.63671	1.452	0.02387
1.46302	0.000444128	1.46302	0.06391	1.46302	0.07497	1.46302	0.01149		1.46302	0.0016	1.46302	0.0527	1.46302	0.61052	1.46302	0.02566
1.47408	0.00137	1.47408	0.05861	1.47408	0.07409	1.47408	0.01001		1.47408	0.0012	1.47408	0.04969	1.47408	0.6046	1.47408	0.0261
1.48519	0.000748608	1.48519	0.07795	1.48519	0.07225	1.48519	0.00835		1.48519	0.000586446	1.48519	0.04352	1.48519	0.58116	1.48519	0.02464
1.49633	2.73763e-05	1.49633	0.08494	1.49633	0.07721	1.49633	0.00823		1.49633	0.000498563	1.49633	0.03798	1.49633	0.54502	1.49633	0.02052
1.50752	0.000116808	1.50752	0.06731	1.50752	0.08123	1.50752	0.00783		1.50752	0.000496775	1.50752	0.03899	1.50752	0.56333	1.50752	0.02052
1.51875	0.000136646	1.51875	0.05366	1.51875	0.07775	1.51875	0.00623		1.51875	0.000172249	1.51875	0.03917	1.51875	0.60549	1.51875	0.02421
1.53002	0.00059922	1.53002	0.06181	1.53002	0.07769	1.53002	0.00518		1.53002	0	1.53002	0.03057	1.53002	0.5893	1.53002	0.02507
1.54133	0.000991053	1.54133	0.0781	1.54133	0.074	1.54133	0.00779		1.54133	0.000131822	1.54133	0.0263	1.54133	0.52815	1.54133	0.02257
1.55269	0.000480104	1.55269	0.0801	1.55269	0.07846	1.55269	0.01022		1.55269	0.000471532	1.55269	0.02838	1.55269	0.50251	1.55269	0.02124
1.56408	0.000121824	1.56408	0.0648	1.56408	0.0892	1.56408	0.01005		1.56408	0.000137821	1.56408	0.02539	1.56408	0.51285	1.56408	0.02144
1.57552	0.000157036	1.57552	0.06162	1.57552	0.09026	1.57552	0.01106		1.57552	0	1.57552	0.0229	1.57552	0.51504	1.57552	0.02036
1.587	0.000584996	1.587	0.07695	1.587	0.08915	1.587	0.01145		1.587	8.57119e-05	1.587	0.02219	1.587	0.4959	1.587	0.01987
1.59852	0.000588844	1.59852	0.07429	1.59852	0.08811	1.59852	0.00701		1.59852	0.000116715	1.59852	0.01654	1.59852	0.49608	1.59852	0.02317
1.61008	0	1.61008	0.06591	1.61008	0.09159	1.61008	0.00458		1.61008	0	1.61008	0.01283	1.61008	0.51578	1.61008	0.0227
1.62169	0	1.62169	0.06503	1.62169	0.0883	1.62169	0.00672		1.62169	0	1.62169	0.01547	1.62169	0.50217	1.62169	0.01848
1.63333	0	1.63333	0.06041	1.63333	0.07656	1.63333	0.00841		1.63333	0	1.63333	0.01471	1.63333	0.46063	1.63333	0.02028
1.64502	0.000232525	1.64502	0.05764	1.64502	0.07961	1.64502	0.00808		1.64502	0	1.64502	0.0105	1.64502	0.43717	1.64502	0.0209
1.65675	0.000259572	1.65675	0.05313	1.65675	0.08929	1.65675	0.00739		1.65675	7.88421e-05	1.65675	0.00735	1.65675	0.44473	1.65675	0.01922
1.66852	0.000106758	1.66852	0.05128	1.66852	0.09058	1.66852	0.00876		1.66852	0.000129381	1.66852	0.0083	1.66852	0.4454	1.66852	0.02503
1.68033	0	1.68033	0.0541	1.68033	0.08572	1.68033	0.01037		1.68033	0	1.68033	0.01023	1.68033	0.40992	1.68033	0.02748
1.69219	0	1.69219	0.05836	1.69219	0.07257	1.69219	0.00811		1.69219	0	1.69219	0.0073	1.69219	0.3859	1.69219	0.02045
1.70408	0.000368043	1.70408	0.05662	1.70408	0.07593	1.70408	0.00487		1.70408	3.15411e-05	1.70408	0.00341	1.70408	0.39455	1.70408	0.01855
1.71602	0.000132542	1.71602	0.05082	1.71602	0.08592	1.71602	0.00683		1.71602	8.69782e-05	1.71602	0.00321	1.71602	0.39118	1.71602	0.02119
1.728	0	1.728	0.05632	1.728	0.07958	1.728	0.01045		1.728	0.000126059	1.728	0.00483	1.728	0.36858	1.728	0.02163
1.74002	0	1.74002	0.05712	1.74002	0.0767	1.74002	0.00735		1.74002	0.000140438	1.74002	0.00418	1.74002	0.34797	1.74002	0.02204
1.75208	0.000147545	1.75208	0.04336	1.75208	0.07489	1.75208	0.00312		1.75208	0	1.75208	0.00229	1.75208	0.33086	1.75208	0.02194
1.76419	0.00019371	1.76419	0.03969	1.76419	0.06972	1.76419	0.00503		1.76419	7.92552e-05	1.76419	0.00334	1.76419	0.31942	1.76419	0.0216
1.77633	0.000286586	1.77633	0.04351	1.77633	0.07676	1.77633	0.00887		1.77633	0.000293649	1.77633	0.00376	1.77633	0.31491	1.77633	0.02182
1.78852	0.000762931	1.78852	0.04281	1.78852	0.07967	1.78852	0.00783		1.78852	0	1.78852	0.00294	1.78852	0.30055	1.78852	0.02346
1.80075	0.000564934	1.80075	0.03811	1.80075	0.0717	1.80075	0.00538		1.80075	0	1.80075	0.00411	1.80075	0.28319	1.80075	0.02552
1.81302	0.000107531	1.81302	0.03207	1.81302	0.06825	1.81302	0.00627		1.81302	0	1.81302	0.0031	1.81302	0.26972	1.81302	0.0244
1.82533	0.000274896	1.82533	0.03008	1.82533	0.06987	1.82533	0.0071		1.82533	0	1.82533	0.00109	1.82533	0.25924	1.82533	0.02028
1.83769	0.000337579	1.83769	0.02836	1.83769	0.07064	1.83769	0.00478		1.83769	4.75102e-05	1.83769	0.00243	1.83769	0.25332	1.83769	0.01767
1.85008	9.57634e-05	1.85008	0.02856	1.85008	0.06596	1.85008	0.00302		1.85008	0.000253775	1.85008	0.00393	1.85008	0.23725	1.85008	0.01876
1.86252	0	1.86252	0.02795	1.86252	0.06517	1.86252	0.00524		1.86252	9.34343e-05	1.86252	0.00281	1.86252	0.21921	1.86252	0.02157
1.875	2.21403e-06	1.875	0.02251	1.875	0.07626	1.875	0.00599		1.875	1.73142e-05	1.875	0.00104	1.875	0.20496	1.875	0.02481
1.88752	0	1.88752	0.02095	1.88752	0.0808	1.88752	0.00531		1.88752	1.9846e-05	1.88752	0.00192	1.88752	0.18992	1.88752	0.02407
1.90008	0	1.90008	0.02086	1.90008	0.07297	1.90008	0.00708		1.90008	0	1.90008	0.00312	1.90008	0.17847	1.90008	0.02135
1.91269	0	1.91269	0.01996	1.91269	0.06723	1.91269	0.00711		1.91269	0	1.91269	0.00199	1.91269	0.16513	1.91269	0.02484
1.92533	0	1.92533	0.01893	1.92533	0.0674	1.92533	0.00528		1.92533	0	1.92533	0.00118	1.92533	0.1557	1.92533	0.02968
1.93802	0.000919629	1.93802	0.01493	1.93802	0.06805	1.93802	0.00558		1.93802	0	1.93802	0.00217	1.93802	0.14273	1.93802	0.02784
1.95075	0.000865689	1.95075	0.01167	1.95075	0.06793	1.95075	0.00774		1.95075	4.52444e-05	1.95075	0.0037	1.95075	0.12918	1.95075	0.02579
1.96352	0.00039611	1.96352	0.01091	1.96352	0.06821	1.96352	0.00794		1.96352	0.000191066	1.96352	0.00444	1.96352	0.12015	1.96352	0.02548
1.97633	0.000120698	1.97633	0.01028	1.97633	0.06696	1.97633	0.0058		1.97633	0	1.97633	0.0038	1.97633	0.11291	1.97633	0.0256
1.98919	0	1.98919	0.00873	1.98919	0.06467	1.98919	0.00591		1.98919	0	1.98919	0.00297	1.98919	0.10835	1.98919	0.02581
2.00208	0	2.00208	0.00821	2.00208	0.06508	2.00208	0.00666		2.00208	0	2.00208	0.00144	2.00208	0.10123	2.00208	0.02546
2.01502	0	2.01502	0.00805	2.01502	0.06506	2.01502	0.00578		2.01502	0	2.01502	0.000903517	2.01502	0.09627	2.01502	0.02457
2.028	0	2.028	0.0064	2.028	0.06995	2.028	0.00681		2.028	0	2.028	0.00271	2.028	0.08239	2.028	0.02641
2.04102	0	2.04102	0.00506	2.04102	0.07255	2.04102	0.00724		2.04102	0	2.04102	0.0028	2.04102	0.07097	2.04102	0.02542
2.05408	0	2.05408	0.00375	2.05408	0.06381	2.05408	0.00512		2.05408	0	2.05408	0.00119	2.05408	0.07397	2.05408	0.01991
2.06719	0	2.06719	0.00237	2.06719	0.05917	2.06719	0.00431		2.06719	0	2.06719	0.000997725	2.06719	0.06065	2.06719	0.02062
2.08033	0	2.08033	0.00372	2.08033	0.06347	2.08033	0.00561		2.08033	0	2.08033	0.000535586	2.08033	0.04574	2.08033	0.01314
2.09352	0	2.09352	0.00168	2.09352	0.05854	2.09352	0.00536		2.09352	0	2.09352	0	2.09352	0.04678	2.09352	0.01515
2.10675	0	2.10675	1.76201e-50	2.10675	0.04073	2.10675	0		2.10675	0	2.10675	0	2.10675	0.03603	2.10675	0.04626
2.12002	0	2.12002	0.00285	2.12002	0.0546	2.12002	0.00618		2.12002	0	2.12002	0.00201	2.12002	0.04806	2.12002	0.04357
2.13333	0	2.13333	0.02395	2.13333	0.08082	2.13333	0.02645		2.13333	0.01241	2.13333	0.00123	2.13333	0.06011	2.13333	0.02719
2.14669	0.01231	2.14669	0.01124	2.14669	0.06631	2.14669	0.01645		2.14669	0.00563	2.14669	5.71205e-06	2.14669	0.03778	2.14669	0.02795
2.16008	0.00621	2.16008	1.76201e-50	2.16008	0.05163	2.16008	0.00652		2.16008	0	2.16008	0	2.16008	0.02767	2.16008	0.02754
2.17352	0	2.17352	0.00199	2.17352	0.05008	2.17352	0.0063		2.17352	0.0002519	2.17352	0.00218	2.17352	0.02617	2.17352	0.02257
2.187	0	2.187	0.00287	2.187	0.0507	2.187	0.00811		2.187	0.000690881	2.187	0.00321	2.187	0.02173	2.187	0.0213
2.20052	0.000591885	2.20052	0.00164	2.20052	0.04722	2.20052	0.00913		2.20052	0	2.20052	0.00172	2.20052	0.02137	2.20052	0.02339
2.21408	0.000213732	2.21408	0.00102	2.21408	0.04412	2.21408	0.00747		2.21408	0	2.21408	0.00148	2.21408	0.02566	2.21408	0.02322
2.22769	0	2.22769	0.00219	2.22769	0.0436	2.22769	0.00675		2.22769	0.000197841	2.22769	0.00293	2.22769	0.0229	2.22769	0.02073
2.24133	0.000368927	2.24133	0.00284	2.24133	0.04405	2.24133	0.00812		2.24133	0	2.24133	0.00261	2.24133	0.0128	2.24133	0.02125
2.25502	0.000440772	2.25502	0.000483948	2.25502	0.04455	2.25502	0.01037		2.25502	0	2.25502	0.000748998	2.25502	0.00987	2.25502	0.02176
2.26875	0	2.26875	0.000425129	2.26875	0.03894	2.26875	0.01054		2.26875	1.55279e-05	2.26875	0	2.26875	0.01216	2.26875	0.0206
2.28252	0	2.28252	0.00153	2.28252	0.03418	2.28252	0.00848		2.28252	0.000199438	2.28252	0.00103	2.28252	0.01395	2.28252	0.01988
2.29633	0.000265896	2.29633	0.00163	2.29633	0.03478	2.29633	0.00894		2.29633	0	2.29633	0.00312	2.29633	0.01403	2.29633	0.01778
2.31019	0	2.31019	0.0018	2.31019	0.03239	2.31019	0.01171		2.31019	0	2.31019	0.00257	2.31019	0.00978	2.31019	0.01493
2.32408	0	2.32408	0.00132	2.32408	0.02977	2.32408	0.01168		2.32408	7.00837e-05	2.32408	0.000859066	2.32408	0.00804	2.32408	0.01508
2.33802	4.56729e-05	2.33802	0.000578223	2.33802	0.02868	2.33802	0.00939		2.33802	8.01119e-05	2.33802	0.000983107	2.33802	0.00955	2.33802	0.01564
2.352	0.000231161	2.352	0.000212783	2.352	0.02871	2.352	0.01019		2.352	0	2.352	0.00135	2.352	0.00898	2.352	0.01424
2.36602	0.000178222	2.36602	0.000864731	2.36602	0.02695	2.36602	0.01031		2.36602	0	2.36602	0.00119	2.36602	0.00728	2.36602	0.01254
2.38008	0.000248924	2.38008	0.00128	2.38008	0.02337	2.38008	0.00764		2.38008	0.000312255	2.38008	0	2.38008	0.00536	2.38008	0.01269
2.39419	0.000246355	2.39419	0.0014	2.39419	0.02188	2.39419	0.00927		2.39419	9.37481e-05	2.39419	0.000275573	2.39419	0.00629	2.39419	0.01473
2.40833	0	2.40833	0.00181	2.40833	0.01922	2.40833	0.0121		2.40833	0	2.40833	0.00272	2.40833	0.00648	2.40833	0.01496
2.42252	0	2.42252	0.000623384	2.42252	0.01362	2.42252	0.01019		2.42252	0.000126862	2.42252	0.00261	2.42252	0.0042	2.42252	0.01002
2.43675	3.81249e-06	2.43675	1.76201e-50	2.43675	0.01242	2.43675	0.00956		2.43675	0	2.43675	0.000321158	2.43675	0.00464	2.43675	0.00652
2.45102	0.000258672	2.45102	0.000528958	2.45102	0.01491	2.45102	0.01118		2.45102	0	2.45102	0	2.45102	0.00625	2.45102	0.00795
2.46533	0	2.46533	0.00179	2.46533	0.01412	2.46533	0.01243		2.46533	0.000348745	2.46533	0.000672735	2.46533	0.007	2.46533	0.00846
2.47969	0	2.47969	0.000834237	2.47969	0.01129	2.47969	0.01336		2.47969	0.000289251	2.47969	0.00152	2.47969	0.0042	2.47969	0.00741
2.49408	8.90605e-05	2.49408	1.76201e-50	2.49408	0.01014	2.49408	0.01173		2.49408	0	2.49408	0.000760661	2.49408	0.00302	2.49408	0.00667
2.50852	0.000339637	2.50852	1.76201e-50	2.50852	0.0104	2.50852	0.00961		2.50852	0	2.50852	0.00019168	2.50852	0.00612	2.50852	0.00698
2.523	0.000208473	2.523	0.000737152	2.523	0.01033	2.523	0.01011		2.523	0.000341552	2.523	0.00114	2.523	0.00604	2.523	0.00826
2.53752	0.000103202	2.53752	0.00225	2.53752	0.00883	2.53752	0.01097		2.53752	0.000502363	2.53752	0.00103	2.53752	0.00464	2.53752	0.00699
2.55208	0	2.55208	0.00194	2.55208	0.00702	2.55208	0.01175		2.55208	0.000203218	2.55208	0	2.55208	0.00582	2.55208	0.00406
2.56669	3.02848e-06	2.56669	0.000420219	2.56669	0.00604	2.56669	0.01169		2.56669	0.000266262	2.56669	4.42009e-05	2.56669	0.00548	2.56669	0.00394
2.58133	0.000174292	2.58133	5.45291e-05	2.58133	0.00482	2.58133	0.00974		2.58133	6.36639e-05	2.58133	0.000706742	2.58133	0.00406	2.58133	0.00481
2.59602	0	2.59602	0.000690198	2.59602	0.00386	2.59602	0.00869		2.59602	0	2.59602	0.000610124	2.59602	0.00513	2.59602	0.00388
2.61075	0	2.61075	0.000892836	2.61075	0.00321	2.61075	0.00995		2.61075	0	2.61075	0.000653681	2.61075	0.00538	2.61075	0.0031
2.62552	0.000668761	2.62552	0.000290943	2.62552	0.00236	2.62552	0.01072		2.62552	0.000194353	2.62552	0.000276919	2.62552	0.00462	2.62552	0.00343
2.64033	0.000741691	2.64033	1.76201e-50	2.64033	0.00249	2.64033	0.00985		2.64033	9.52798e-05	2.64033	0.00016434	2.64033	0.00556	2.64033	0.00341
2.65519	0	2.65519	0.000293305	2.65519	0.00308	2.65519	0.00854		2.65519	8.6733e-05	2.65519	0.000244059	2.65519	0.00522	2.65519	0.00265
2.67008	0	2.67008	0.000616332	2.67008	0.00329	2.67008	0.00788		2.67008	0	2.67008	0	2.67008	0.005	2.67008	0.00206
2.68502	0.00033115	2.68502	1.76201e-50	2.68502	0.00272	2.68502	0.00848		2.68502	0	2.68502	4.68725e-05	2.68502	0.00621	2.68502	0.0021
2.7	0.000355112	2.7	0.000183938	2.7	0.00111	2.7	0.00894		2.7	0.000209518	2.7	0.00062229	2.7	0.00554	2.7	0.00246
2.71502	0	2.71502	0.000546794	2.71502	0.000283586	2.71502	0.0088		2.71502	0.000271513	2.71502	0.000648898	2.71502	0.00461	2.71502	0.00158
2.73008	0	2.73008	0.000336915	2.73008	0.00108	2.73008	0.00858		2.73008	0	2.73008	0	2.73008	0.00479	2.73008	0.000248823
2.74519	0.000486858	2.74519	0.000314785	2.74519	0.00164	2.74519	0.00723		2.74519	0	2.74519	0	2.74519	0.00396	2.74519	0.000997564
2.76033	0.000636511	2.76033	0.000510347	2.76033	0.00182	2.76033	0.00645		2.76033	0.000162667	2.76033	0.000370493	2.76033	0.00294	2.76033	0.00167
2.77552	0.000322736	2.77552	7.32075e-05	2.77552	0.00172	2.77552	0.007		2.77552	0.000131099	2.77552	0.000440224	2.77552	0.00334	2.77552	0.0012
2.79075	0	2.79075	1.76201e-50	2.79075	0.00131	2.79075	0.00618		2.79075	2.76563e-05	2.79075	0.000695065	2.79075	0.00422	2.79075	0.00152
2.80602	0.00015008	2.80602	1.76201e-50	2.80602	0.00171	2.80602	0.00459		2.80602	0	2.80602	0.000685717	2.80602	0.00459	2.80602	0.00177
2.82133	0.000392563	2.82133	1.76201e-50	2.82133	0.0019	2.82133	0.00455		2.82133	0	2.82133	0	2.82133	0.00437	2.82133	0.00103
2.83669	0.000134031	2.83669	0.000897794	2.83669	0.00132	2.83669	0.00487		2.83669	0.000371125	2.83669	0	2.83669	0.00324	2.83669	0.000244969
2.85208	0	2.85208	0.00143	2.85208	0.000793762	2.85208	0.00473		2.85208	0.000630409	2.85208	0.000409734	2.85208	0.00221	2.85208	0.0012
2.86752	0.000116888	2.86752	0.000137619	2.86752	0.000445865	2.86752	0.00507		2.86752	0.000257519	2.86752	0.000545174	2.86752	0.00266	2.86752	0.00269
2.883	0.000454667	2.883	1.76201e-50	2.883	0.000451829	2.883	0.00466		2.883	0	2.883	0	2.883	0.00345	2.883	0.002
2.89852	3.5987e-05	2.89852	1.76201e-50	2.89852	0.000988374	2.89852	0.00309		2.89852	0	2.89852	5.77137e-05	2.89852	0.00345	2.89852	0.00111
2.91408	0	2.91408	0.000142929	2.91408	0.00119	2.91408	0.00255		2.91408	7.2104e-05	2.91408	0.000657823	2.91408	0.00325	2.91408	0.00187
2.92969	0	2.92969	0.000749427	2.92969	0.000380172	2.92969	0.00373		2.92969	2.19944e-05	2.92969	0.00040305	2.92969	0.0022	2.92969	0.00144
2.94533	0	2.94533	0.000631457	2.94533	0	2.94533	0.00431		2.94533	0.000112216	2.94533	0.000217381	2.94533	0.00111	2.94533	0.000876658
2.96102	8.98609e-05	2.96102	0.000128112	2.96102	0.000199855	2.96102	0.00325		2.96102	0.000252065	2.96102	0	2.96102	0.00182	2.96102	0.00164
2.97675	0.000878518	2.97675	0.000239727	2.97675	0.000687502	2.97675	0.0025		2.97675	0.000326661	2.97675	0	2.97675	0.00229	2.97675	0.00229
2.99252	0.000755889	2.99252	0.00063561	2.99252	0.000574986	2.99252	0.00227		2.99252	0.000305531	2.99252	0.000482326	2.99252	0.00166	2.99252	0.00201
3.00833	0	3.00833	0.00060072	3.00833	0.000993	3.00833	0.00167		3.00833	0.000153682	3.00833	0.000700334	3.00833	0.00178	3.00833	0.00116
3.02419	0	3.02419	0.000499181	3.02419	0.000760548	3.02419	0.00127		3.02419	0	3.02419	0.000326131	3.02419	0.0019	3.02419	0.00141
3.04008	0.000138389	3.04008	1.76201e-50	3.04008	0	3.04008	0.00136		3.04008	0	3.04008	0	3.04008	0.0014	3.04008	0.00315
3.05602	0.0003836	3.05602	1.76201e-50	3.05602	0.00026412	3.05602	0.00151		3.05602	0.000199664	3.05602	0	3.05602	0.00126	3.05602	0.00316
3.072	0.000214521	3.072	0.000155852	3.072	0.000541298	3.072	0.00134		3.072	0.000197949	3.072	0	3.072	0.000617105	3.072	0.00125
3.08802	0.000162223	3.08802	0.000381364	3.08802	0.000234247	3.08802	0.00108		3.08802	0	3.08802	0.000617381	3.08802	0.000375853	3.08802	0.000533525
3.10408	0.000288387	3.10408	0.000739696	3.10408	0.000347939	3.10408	0.00143		3.10408	0	3.10408	0.000668875	3.10408	0.00123	3.10408	0.00161
3.12019	0.000465085	3.12019	0.000761965	3.12019	0.00030562	3.12019	0.00152		3.12019	0	3.12019	0.000525874	3.12019	0.00142	3.12019	0.00196
3.13633	0.000304894	3.13633	1.76201e-50	3.13633	0.000358984	3.13633	0.00106		3.13633	0	3.13633	0.000218801	3.13633	0.00092269	3.13633	0.0013
3.15252	0	3.15252	1.76201e-50	3.15252	0.000954105	3.15252	0.000986884		3.15252	0	3.15252	0	3.15252	0.000612278	3.15252	0.00165
3.16875	0	3.16875	0.000833784	3.16875	0.000749417	3.16875	0.000707763		3.16875	0.000132118	3.16875	0	3.16875	0.00116	3.16875	0.00227
3.18502	0.000316918	3.18502	0.00119	3.18502	0	3.18502	0.00041736		3.18502	7.70384e-05	3.18502	0.000324763	3.18502	0.00124	3.18502	0.00158
3.20133	0.00107	3.20133	0.000708378	3.20133	0	3.20133	0.000871502		3.20133	0	3.20133	0.000864444	3.20133	0.000495521	3.20133	0.00142
3.21769	0.000357851	3.21769	0.000416805	3.21769	0.000544306	3.21769	0.00117		3.21769	0.000126342	3.21769	0.00121	3.21769	6.1303e-05	3.21769	0.00223
3.23408	0	3.23408	1.76201e-50	3.23408	0.000966855	3.23408	0.000806873		3.23408	0.000417758	3.23408	0.000692096	3.23408	0	3.23408	0.00184
3.25052	0	3.25052	1.76201e-50	3.25052	0.000568324	3.25052	0.000284831		3.25052	0.000323838	3.25052	0	3.25052	0.000362744	3.25052	0.00114
3.267	0.000168235	3.267	0.00109	3.267	0.000277619	3.267	0.000148313		3.267	4.85339e-05	3.267	0	3.267	0.000677076	3.267	0.00107
3.28352	0.00034275	3.28352	0.00117	3.28352	0.000405521	3.28352	0.000575713		3.28352	0.000102198	3.28352	0	3.28352	0.000595201	3.28352	0.00155
3.30008	0.000427537	3.30008	0.000815205	3.30008	0.000474289	3.30008	0.000923139		3.30008	0.000381378	3.30008	0.000925231	3.30008	0.000894069	3.30008	0.00171
3.31669	0.000474268	3.31669	0.00101	3.31669	0.000457795	3.31669	0.000900123		3.31669	0.000204913	3.31669	0.00126	3.31669	0.0012	3.31669	0.00137
3.33333	0.000336501	3.33333	0.000275785	3.33333	0.000422193	3.33333	0.000566965		3.33333	0	3.33333	0.000735633	3.33333	0.000950924	3.33333	0.0016
3.35002	0.00033929	3.35002	1.76201e-50	3.35002	0.000621373	3.35002	0.00039314		3.35002	0	3.35002	0.000356994	3.35002	5.13036e-05	3.35002	0.0018
3.36675	0.000412745	3.36675	1.76201e-50	3.36675	0.000645092	3.36675	0.000433107		3.36675	2.3276e-05	3.36675	0	3.36675	0	3.36675	0.00104
3.38352	0.000279601	3.38352	0.000843154	3.38352	0.000680392	3.38352	0.000416634		3.38352	0	3.38352	0	3.38352	0	3.38352	0.000780871
3.40033	0	3.40033	1.76201e-50	3.40033	0.00041272	3.40033	0.000705397		3.40033	0	3.40033	0.000374127	3.40033	0.000415623	3.40033	0.00121
3.41719	0	3.41719	1.76201e-50	3.41719	8.42845e-05	3.41719	0.000657268		3.41719	0.000111873	3.41719	0.000225483	3.41719	0.000740485	3.41719	0.00108
3.43408	0.00059061	3.43408	0.00124	3.43408	0.000241116	3.43408	0.000328229		3.43408	0.000493974	3.43408	0	3.43408	0.000451203	3.43408	0.000766505
3.45102	0.000757459	3.45102	0.00109	3.45102	0.000375812	3.45102	0.00048489		3.45102	0.000159258	3.45102	0.000334691	3.45102	6.14181e-05	3.45102	0.000447902
3.468	0.000682284	3.468	0.000649198	3.468	0.000401236	3.468	0.000463328		3.468	0.000117021	3.468	0.00032633	3.468	0.000470925	3.468	4.7239e-05
3.48502	0.000282947	3.48502	0.000685449	3.48502	0.000287434	3.48502	0.000320153		3.48502	0.000157036	3.48502	0	3.48502	0.000699255	3.48502	0.000186512
3.50208	0	3.50208	1.76201e-50	3.50208	0.000254855	3.50208	0.0003003		3.50208	0	3.50208	0	3.50208	0	3.50208	0.000451852
3.51919	0.000441613	3.51919	1.76201e-50	3.51919	0.000160709	3.51919	0.000109604		3.51919	1.82401e-05	3.51919	0	3.51919	0	3.51919	0.000499205
3.53633	0.000651014	3.53633	0.00102	3.53633	0.000298998	3.53633	9.32302e-05		3.53633	0.000365316	3.53633	0	3.53633	2.53537e-05	3.53633	0.000444316
3.55352	0	3.55352	0.00113	3.55352	5.82061e-05	3.55352	0		3.55352	0.000121987	3.55352	0	3.55352	0.000500194	3.55352	0.000119525
3.57075	0.00028531	3.57075	1.76201e-50	3.57075	0	3.57075	1.15432e-05		3.57075	0	3.57075	5.67791e-05	3.57075	0.000502955	3.57075	0
3.58802	0.000839773	3.58802	0.000108876	3.58802	0.001	3.58802	0.00121		3.58802	0.000272535	3.58802	0.00152	3.58802	0.000247848	3.58802	3.83707e-05
3.60533	0.000367508	3.60533	0.00106	3.60533	0.000875598	3.60533	0.000942154		3.60533	0.000343971	3.60533	0.000788663	3.60533	0	3.60533	0.000607012
3.62269	0.000165912	3.62269	0.000761316	3.62269	1.6949e-05	3.62269	0.000337154		3.62269	0.000187604	3.62269	0	3.62269	0	3.62269	0.000965947
3.64008	0.000248588	3.64008	0.000621893	3.64008	0.000144428	3.64008	0.000220089		3.64008	0	3.64008	4.11478e-05	3.64008	0.000196113	3.64008	0.000729571
3.65752	0	3.65752	0.000843816	3.65752	0.000407086	3.65752	0		3.65752	0	3.65752	0.000582069	3.65752	6.83074e-05	3.65752	0.000376082
3.675	0	3.675	0.000530657	3.675	0.000479835	3.675	0.000124198		3.675	4.10693e-05	3.675	0.000757729	3.675	0	3.675	7.73485e-05
3.69252	0.000510471	3.69252	1.76201e-50	3.69252	2.75986e-05	3.69252	0.000398603		3.69252	0.000224324	3.69252	0.000670549	3.69252	0.00012648	3.69252	0.000200372
3.71008	0.000670844	3.71008	1.76201e-50	3.71008	0	3.71008	0.000333112		3.71008	0.000344603	3.71008	0.000448679	3.71008	0.000513966	3.71008	0.000477576
3.72769	0.000282227	3.72769	0.000110424	3.72769	0.000377052	3.72769	0.000136422		3.72769	0.000509495	3.72769	5.98297e-05	3.72769	0	3.72769	0.00044238
3.74533	0.00012955	3.74533	0.00124	3.74533	0.000781887	3.74533	0.000106625		3.74533	0.00020532	3.74533	0	3.74533	0	3.74533	0.000321543
3.76302	1.68314e-05	3.76302	0.000866216	3.76302	0.000244253	3.76302	0.000122134		3.76302	0	3.76302	0	3.76302	1.58021e-05	3.76302	0
3.78075	0.000139718	3.78075	1.76201e-50	3.78075	0	3.78075	0.000280826		3.78075	0.000121653	3.78075	0.000699893	3.78075	0.000429117	3.78075	0
3.79852	0.000178964	3.79852	1.76201e-50	3.79852	7.21857e-05	3.79852	0.000486815		3.79852	0.000315241	3.79852	0.000694621	3.79852	0.000654835	3.79852	7.44055e-05
3.81633	9.32459e-05	3.81633	1.76201e-50	3.81633	0.000177042	3.81633	0.000174653		3.81633	0.000297907	3.81633	0.000169152	3.81633	0.000519732	3.81633	0
3.83419	0.000212249	3.83419	0.000200982	3.83419	0.000295866	3.83419	0		3.83419	3.05656e-05	3.83419	0	3.83419	0.000167545	3.83419	0.000116959
3.85208	0	3.85208	0.000632452	3.85208	8.55236e-05	3.85208	0.000136729		3.85208	2.41747e-05	3.85208	0.000460867	3.85208	2.80896e-05	3.85208	0.000360344
3.87002	0	3.87002	0.000238714	3.87002	1.52134e-05	3.87002	0.000401183		3.87002	0.000106475	3.87002	0.000254477	3.87002	0.000117504	3.87002	0
3.888	0.000128747	3.888	0.000712339	3.888	0.000215286	3.888	0.000204988		3.888	3.86958e-05	3.888	0	3.888	0.000278282	3.888	0
3.90602	0.000227429	3.90602	0.00131	3.90602	0.000165453	3.90602	0		3.90602	0.000188309	3.90602	0.000365244	3.90602	0.000183583	3.90602	0.00046171
3.92408	0	3.92408	0.000665258	3.92408	0.000304214	3.92408	0.000174518		3.92408	0.000155236	3.92408	0.000818998	3.92408	0.00037042	3.92408	0.000812028
3.94219	0.00035254	3.94219	1.76201e-50	3.94219	0.000247766	3.94219	0.000363354		3.94219	0.000109884	3.94219	0.000947816	3.94219	0.000536594	3.94219	0.000214241
3.96033	0.000924335	3.96033	1.76201e-50	3.96033	0	3.96033	5.52092e-06		3.96033	8.25807e-05	3.96033	0.000742718	3.96033	0.000218351	3.96033	0
3.97852	0.000302033	3.97852	0.000120345	3.97852	0	3.97852	0.00022386		3.97852	0	3.97852	0	3.97852	0.000218068	3.97852	9.02081e-05
3.99675	0	3.99675	0.000264823	3.99675	0.00037438	3.99675	0.000499547		3.99675	0	3.99675	0	3.99675	0.000358202	3.99675	6.36405e-05
4.01502	0.000137388	4.01502	1.76201e-50	4.01502	0.000340331	4.01502	0.000192837		4.01502	0	4.01502	0	4.01502	0.000123677	4.01502	0
4.03333	0.000510645	4.03333	1.76201e-50	4.03333	0	4.03333	0		4.03333	0	4.03333	0.00061359	4.03333	0.000100015	4.03333	0.000112857
4.05169	3.76614e-05	4.05169	0.000312784	4.05169	0	4.05169	8.50355e-05		4.05169	0.000295693	4.05169	0.000645108	4.05169	2.92198e-05	4.05169	0.000450004
4.07008	0	4.07008	0.00016159	4.07008	0	4.07008	0.00016151		4.07008	0.000220302	4.07008	0.000138676	4.07008	0.000238067	4.07008	8.11524e-05
4.08852	0	4.08852	3.52312e-05	4.08852	0	4.08852	5.99105e-05		4.08852	9.89703e-05	4.08852	0	4.08852	0.000424281	4.08852	0
4.107	5.5113e-05	4.107	0.000775816	4.107	6.2478e-06	4.107	6.84107e-05		4.107	2.53896e-05	4.107	0.000105335	4.107	9.24305e-05	4.107	8.66667e-05
4.12552	0.00012352	4.12552	0.000964273	4.12552	0.000204673	4.12552	0.000299078		4.12552	0.00012233	4.12552	0.000587655	4.12552	0	4.12552	0.000439458
4.14408	0.000114472	4.14408	0.000277194	4.14408	0.000468419	4.14408	0.000352358		4.14408	0.000314796	4.14408	0.000416005	4.14408	0.000212189	4.14408	0.000219297
4.16269	0.000155527	4.16269	1.76201e-50	4.16269	0.000210375	4.16269	0.000166795		4.16269	7.87398e-05	4.16269	0	4.16269	0.000422038	4.16269	0
4.18133	0.000399925	4.18133	1.76201e-50	4.18133	0	4.18133	0		4.18133	0	4.18133	0	4.18133	0.00014294	4.18133	0
4.20002	0.000330192	4.20002	0.000480825	4.20002	7.41894e-05	4.20002	0.000103061		4.20002	1.66371e-05	4.20002	0.000222138	4.20002	0	4.20002	0.000557436
4.21875	0.0002916	4.21875	2.14864e-05	4.21875	0.000668174	4.21875	0.000324142		4.21875	0.000251111	4.21875	0.000674941	4.21875	0.000619809	4.21875	0.00042082
4.23752	0.000355211	4.23752	3.63943e-05	4.23752	0.000369696	4.23752	0.000101061		4.23752	6.07905e-05	4.23752	0.00062192	4.23752	0.000420111	4.23752	5.50138e-06
4.25633	0.000207335	4.25633	0.000554874	4.25633	0	4.25633	0		4.25633	0	4.25633	0.000141576	4.25633	0	4.25633	0.000123173
4.27519	0.000139053	4.27519	0.000222015	4.27519	0	4.27519	0.000177942		4.27519	4.5201e-05	4.27519	0	4.27519	0	4.27519	0.00017769
4.29408	0	4.29408	0.000592893	4.29408	0.000458545	4.29408	0.000331723		4.29408	0.000250755	4.29408	0	4.29408	1.57245e-05	4.29408	1.42422e-05
4.31302	0	4.31302	0.000705018	4.31302	0.000509092	4.31302	0.000127605		4.31302	0.000177527	4.31302	0.000111079	4.31302	0.000456651	4.31302	0.000131568
4.332	0	4.332	0.000132273	4.332	7.51788e-05	4.332	0		4.332	0	4.332	0.000357455	4.332	0.000175953	4.332	0.000495012
4.35102	8.54178e-05	4.35102	1.76201e-50	4.35102	0.000321147	4.35102	0.000198648		4.35102	9.82066e-05	4.35102	0.000102704	4.35102	0	4.35102	0.000390522
4.37008	0.000273858	4.37008	1.76201e-50	4.37008	0.000960568	4.37008	0.000281009		4.37008	0.00039267	4.37008	0	4.37008	0	4.37008	0
4.38919	0.000523712	4.38919	0.000491154	4.38919	0.000188567	4.38919	0.000185629		4.38919	0	4.38919	0.000106696	4.38919	0.000194845	4.38919	0
4.40833	0.0005496	4.40833	0.000415298	4.40833	0	4.40833	0.000192458		4.40833	0	4.40833	0.000157072	4.40833	0.000430679	4.40833	0
4.42752	0.000275303	4.42752	1.76201e-50	4.42752	0	4.42752	0.000142122		4.42752	0	4.42752	3.64608e-05	4.42752	0.000206447	4.42752	5.33129e-07
4.44675	5.16827e-50	4.44675	0	4.44675	5.37118e-50	4.44675	1.80592e-50		4.44675	4.57332e-50	4.44675	6.80991e-50	4.44675	0.00021148	4.44675	0.000151682
													4.46602	0.000344242	4.46602	0.00013976
													4.48533	0.000225249	4.48533	3.46534e-50
													4.50469	0
													4.52408	7.85088e-50

## Sheet: Figure S2
Figure S2			Figure S2 inset (hv =3.87 eV)
Flight time after irradiation (us)	Signal intensity (a.u)		Flight time after irradiation (us)	Signal intensity (a.u)
-0.2485	0.00601		1.9701	0.60406
-0.2484	0.00601		1.9702	0.60403
-0.2483	0.00598		1.9703	0.60396
-0.2482	0.00598		1.9704	0.6039
-0.2481	0.00596		1.9705	0.6038
-0.248	0.00593		1.9706	0.6037
-0.2479	0.0059		1.9707	0.60357
-0.2478	0.0059		1.9708	0.60344
-0.2477	0.00588		1.9709	0.60331
-0.2476	0.00588		1.971	0.60318
-0.2475	0.00585		1.9711	0.60305
-0.2474	0.00585		1.9712	0.60292
-0.2473	0.00585		1.9713	0.60286
-0.2472	0.00583		1.9714	0.60276
-0.2471	0.00583		1.9715	0.6027
-0.247	0.00583		1.9716	0.60263
-0.2469	0.00583		1.9717	0.60257
-0.2468	0.00585		1.9718	0.60253
-0.2467	0.00585		1.9719	0.6025
-0.2466	0.00585		1.972	0.60247
-0.2465	0.00585		1.9721	0.60244
-0.2464	0.00588		1.9722	0.60244
-0.2463	0.00588		1.9723	0.6024
-0.2462	0.0059		1.9724	0.60234
-0.2461	0.0059		1.9725	0.60227
-0.246	0.0059		1.9726	0.60221
-0.2459	0.00593		1.9727	0.60208
-0.2458	0.00593		1.9728	0.60192
-0.2457	0.00593		1.9729	0.60172
-0.2456	0.00596		1.973	0.6015
-0.2455	0.00596		1.9731	0.60124
-0.2454	0.00596		1.9732	0.60098
-0.2453	0.00596		1.9733	0.60068
-0.2452	0.00596		1.9734	0.60039
-0.2451	0.00593		1.9735	0.6001
-0.245	0.00593		1.9736	0.59984
-0.2449	0.00593		1.9737	0.59961
-0.2448	0.0059		1.9738	0.59942
-0.2447	0.0059		1.9739	0.59925
-0.2446	0.0059		1.974	0.59916
-0.2445	0.00588		1.9741	0.59906
-0.2444	0.00588		1.9742	0.59899
-0.2443	0.00588		1.9743	0.59893
-0.2442	0.00588		1.9744	0.59886
-0.2441	0.00588		1.9745	0.5988
-0.244	0.00588		1.9746	0.5987
-0.2439	0.00588		1.9747	0.59857
-0.2438	0.0059		1.9748	0.59844
-0.2437	0.0059		1.9749	0.59831
-0.2436	0.0059		1.975	0.59815
-0.2435	0.0059		1.9751	0.59802
-0.2434	0.0059		1.9752	0.59789
-0.2433	0.00593		1.9753	0.59782
-0.2432	0.0059		1.9754	0.59779
-0.2431	0.0059		1.9755	0.59782
-0.243	0.0059		1.9756	0.59789
-0.2429	0.0059		1.9757	0.59805
-0.2428	0.0059		1.9758	0.59825
-0.2427	0.00588		1.9759	0.59851
-0.2426	0.00588		1.976	0.59883
-0.2425	0.00588		1.9761	0.59916
-0.2424	0.00585		1.9762	0.59948
-0.2423	0.00585		1.9763	0.59981
-0.2422	0.00585		1.9764	0.60013
-0.2421	0.00585		1.9765	0.60039
-0.242	0.00585		1.9766	0.60065
-0.2419	0.00585		1.9767	0.60088
-0.2418	0.00585		1.9768	0.60104
-0.2417	0.00588		1.9769	0.6012
-0.2416	0.00588		1.977	0.60133
-0.2415	0.0059		1.9771	0.60143
-0.2414	0.00593		1.9772	0.60156
-0.2413	0.00593		1.9773	0.60166
-0.2412	0.00596		1.9774	0.60179
-0.2411	0.00598		1.9775	0.60195
-0.241	0.00598		1.9776	0.60211
-0.2409	0.00601		1.9777	0.60231
-0.2408	0.00601		1.9778	0.60253
-0.2407	0.00601		1.9779	0.60273
-0.2406	0.00601		1.978	0.60296
-0.2405	0.00603		1.9781	0.60315
-0.2404	0.00603		1.9782	0.60335
-0.2403	0.00603		1.9783	0.60351
-0.2402	0.00603		1.9784	0.60364
-0.2401	0.00603		1.9785	0.60374
-0.24	0.00603		1.9786	0.6038
-0.2399	0.00603		1.9787	0.60387
-0.2398	0.00603		1.9788	0.60387
-0.2397	0.00603		1.9789	0.60387
-0.2396	0.00601		1.979	0.6038
-0.2395	0.00601		1.9791	0.60374
-0.2394	0.00601		1.9792	0.60367
-0.2393	0.00598		1.9793	0.60357
-0.2392	0.00598		1.9794	0.60348
-0.2391	0.00596		1.9795	0.60335
-0.239	0.00593		1.9796	0.60322
-0.2389	0.00593		1.9797	0.60309
-0.2388	0.0059		1.9798	0.60296
-0.2387	0.0059		1.9799	0.60283
-0.2386	0.00588		1.98	0.6027
-0.2385	0.00588		1.9801	0.60257
-0.2384	0.00585		1.9802	0.60244
-0.2383	0.00585		1.9803	0.60234
-0.2382	0.00583		1.9804	0.60221
-0.2381	0.00583		1.9805	0.60214
-0.238	0.00583		1.9806	0.60208
-0.2379	0.0058		1.9807	0.60201
-0.2378	0.0058		1.9808	0.60195
-0.2377	0.0058		1.9809	0.60192
-0.2376	0.0058		1.981	0.60185
-0.2375	0.0058		1.9811	0.60182
-0.2374	0.0058		1.9812	0.60179
-0.2373	0.0058		1.9813	0.60176
-0.2372	0.0058		1.9814	0.60172
-0.2371	0.00583		1.9815	0.60172
-0.237	0.00583		1.9816	0.60169
-0.2369	0.00585		1.9817	0.60169
-0.2368	0.00588		1.9818	0.60169
-0.2367	0.0059		1.9819	0.60169
-0.2366	0.00593		1.982	0.60169
-0.2365	0.00596		1.9821	0.60169
-0.2364	0.00598		1.9822	0.60172
-0.2363	0.00601		1.9823	0.60172
-0.2362	0.00601		1.9824	0.60179
-0.2361	0.00603		1.9825	0.60185
-0.236	0.00603		1.9826	0.60195
-0.2359	0.00603		1.9827	0.60205
-0.2358	0.00601		1.9828	0.60221
-0.2357	0.00601		1.9829	0.60237
-0.2356	0.00601		1.983	0.60257
-0.2355	0.00598		1.9831	0.60276
-0.2354	0.00598		1.9832	0.60299
-0.2353	0.00596		1.9833	0.60318
-0.2352	0.00596		1.9834	0.60338
-0.2351	0.00596		1.9835	0.60357
-0.235	0.00593		1.9836	0.6037
-0.2349	0.00593		1.9837	0.6038
-0.2348	0.00593		1.9838	0.60387
-0.2347	0.00593		1.9839	0.6039
-0.2346	0.0059		1.984	0.60387
-0.2345	0.0059		1.9841	0.60377
-0.2344	0.0059		1.9842	0.60367
-0.2343	0.00588		1.9843	0.60351
-0.2342	0.00585		1.9844	0.60331
-0.2341	0.00585		1.9845	0.60312
-0.234	0.00583		1.9846	0.60289
-0.2339	0.00583		1.9847	0.60263
-0.2338	0.00583		1.9848	0.6024
-0.2337	0.0058		1.9849	0.60214
-0.2336	0.0058		1.985	0.60192
-0.2335	0.00583		1.9851	0.60169
-0.2334	0.00583		1.9852	0.6015
-0.2333	0.00583		1.9853	0.60133
-0.2332	0.00585		1.9854	0.60117
-0.2331	0.00585		1.9855	0.60104
-0.233	0.00588		1.9856	0.60094
-0.2329	0.00588		1.9857	0.60088
-0.2328	0.00588		1.9858	0.60081
-0.2327	0.00588		1.9859	0.60078
-0.2326	0.00588		1.986	0.60075
-0.2325	0.00588		1.9861	0.60068
-0.2324	0.00585		1.9862	0.60065
-0.2323	0.00585		1.9863	0.60062
-0.2322	0.00585		1.9864	0.60055
-0.2321	0.00585		1.9865	0.60049
-0.232	0.00585		1.9866	0.60039
-0.2319	0.00585		1.9867	0.60029
-0.2318	0.00585		1.9868	0.6002
-0.2317	0.00585		1.9869	0.60007
-0.2316	0.00585		1.987	0.59997
-0.2315	0.00585		1.9871	0.59984
-0.2314	0.00588		1.9872	0.59974
-0.2313	0.00588		1.9873	0.59964
-0.2312	0.00588		1.9874	0.59955
-0.2311	0.00588		1.9875	0.59948
-0.231	0.00588		1.9876	0.59942
-0.2309	0.00585		1.9877	0.59938
-0.2308	0.00585		1.9878	0.59932
-0.2307	0.00585		1.9879	0.59929
-0.2306	0.00583		1.988	0.59925
-0.2305	0.00583		1.9881	0.59922
-0.2304	0.00583		1.9882	0.59916
-0.2303	0.0058		1.9883	0.59912
-0.2302	0.0058		1.9884	0.59909
-0.2301	0.0058		1.9885	0.59903
-0.23	0.0058		1.9886	0.59899
-0.2299	0.0058		1.9887	0.59899
-0.2298	0.0058		1.9888	0.59899
-0.2297	0.0058		1.9889	0.59903
-0.2296	0.00583		1.989	0.59909
-0.2295	0.00583		1.9891	0.59919
-0.2294	0.00583		1.9892	0.59935
-0.2293	0.00583		1.9893	0.59951
-0.2292	0.00585		1.9894	0.59974
-0.2291	0.00585		1.9895	0.59997
-0.229	0.00585		1.9896	0.60023
-0.2289	0.00588		1.9897	0.60052
-0.2288	0.00588		1.9898	0.60078
-0.2287	0.0059		1.9899	0.60107
-0.2286	0.0059		1.99	0.60133
-0.2285	0.00593		1.9901	0.60156
-0.2284	0.00593		1.9902	0.60176
-0.2283	0.00593		1.9903	0.60192
-0.2282	0.00596		1.9904	0.60205
-0.2281	0.00596		1.9905	0.60214
-0.228	0.00596		1.9906	0.60218
-0.2279	0.00596		1.9907	0.60218
-0.2278	0.00596		1.9908	0.60214
-0.2277	0.00596		1.9909	0.60205
-0.2276	0.00598		1.991	0.60195
-0.2275	0.00598		1.9911	0.60182
-0.2274	0.00598		1.9912	0.60172
-0.2273	0.00598		1.9913	0.60159
-0.2272	0.00598		1.9914	0.6015
-0.2271	0.00598		1.9915	0.6014
-0.227	0.00598		1.9916	0.60137
-0.2269	0.00598		1.9917	0.60133
-0.2268	0.00596		1.9918	0.60133
-0.2267	0.00593		1.9919	0.60137
-0.2266	0.0059		1.992	0.60143
-0.2265	0.00588		1.9921	0.6015
-0.2264	0.00585		1.9922	0.60159
-0.2263	0.00583		1.9923	0.60169
-0.2262	0.0058		1.9924	0.60179
-0.2261	0.00578		1.9925	0.60188
-0.226	0.00575		1.9926	0.60198
-0.2259	0.00575		1.9927	0.60208
-0.2258	0.00572		1.9928	0.60214
-0.2257	0.00572		1.9929	0.60224
-0.2256	0.00572		1.993	0.60227
-0.2255	0.00575		1.9931	0.60231
-0.2254	0.00575		1.9932	0.60231
-0.2253	0.00578		1.9933	0.60231
-0.2252	0.00578		1.9934	0.60227
-0.2251	0.0058		1.9935	0.60221
-0.225	0.00583		1.9936	0.60211
-0.2249	0.00585		1.9937	0.60201
-0.2248	0.00585		1.9938	0.60188
-0.2247	0.00588		1.9939	0.60176
-0.2246	0.00588		1.994	0.60163
-0.2245	0.00588		1.9941	0.60146
-0.2244	0.0059		1.9942	0.60133
-0.2243	0.0059		1.9943	0.6012
-0.2242	0.0059		1.9944	0.60111
-0.2241	0.0059		1.9945	0.60101
-0.224	0.0059		1.9946	0.60091
-0.2239	0.0059		1.9947	0.60085
-0.2238	0.0059		1.9948	0.60078
-0.2237	0.0059		1.9949	0.60075
-0.2236	0.00593		1.995	0.60072
-0.2235	0.00593		1.9951	0.60068
-0.2234	0.00593		1.9952	0.60065
-0.2233	0.00593		1.9953	0.60062
-0.2232	0.00593		1.9954	0.60055
-0.2231	0.00596		1.9955	0.60049
-0.223	0.00596		1.9956	0.60042
-0.2229	0.00596		1.9957	0.60033
-0.2228	0.00596		1.9958	0.60023
-0.2227	0.00596		1.9959	0.6001
-0.2226	0.00598		1.996	0.59997
-0.2225	0.00598		1.9961	0.59981
-0.2224	0.00598		1.9962	0.59964
-0.2223	0.00598		1.9963	0.59945
-0.2222	0.00598		1.9964	0.59929
-0.2221	0.00598		1.9965	0.59916
-0.222	0.00598		1.9966	0.59903
-0.2219	0.00598		1.9967	0.59893
-0.2218	0.00598		1.9968	0.59886
-0.2217	0.00596		1.9969	0.59883
-0.2216	0.00596		1.997	0.5988
-0.2215	0.00596		1.9971	0.59883
-0.2214	0.00596		1.9972	0.59886
-0.2213	0.00596		1.9973	0.5989
-0.2212	0.00596		1.9974	0.59893
-0.2211	0.00598		1.9975	0.59893
-0.221	0.00598		1.9976	0.5989
-0.2209	0.00598		1.9977	0.59883
-0.2208	0.00598		1.9978	0.59877
-0.2207	0.00598		1.9979	0.59864
-0.2206	0.00598		1.998	0.59847
-0.2205	0.00596		1.9981	0.59828
-0.2204	0.00596		1.9982	0.59808
-0.2203	0.00596		1.9983	0.59792
-0.2202	0.00596		1.9984	0.59773
-0.2201	0.00593		1.9985	0.5976
-0.22	0.00593		1.9986	0.59747
-0.2199	0.00593		1.9987	0.5974
-0.2198	0.00593		1.9988	0.59734
-0.2197	0.00596		1.9989	0.59734
-0.2196	0.00596		1.999	0.59734
-0.2195	0.00598		1.9991	0.59734
-0.2194	0.00601		1.9992	0.59734
-0.2193	0.00601		1.9993	0.59737
-0.2192	0.00603		1.9994	0.59734
-0.2191	0.00606		1.9995	0.59734
-0.219	0.00609		1.9996	0.59727
-0.2189	0.00609		1.9997	0.59721
-0.2188	0.00609		1.9998	0.59714
-0.2187	0.00611		1.9999	0.59708
-0.2186	0.00611		2	0.59701
-0.2185	0.00609		2.0001	0.59695
-0.2184	0.00609		2.0002	0.59695
-0.2183	0.00606		2.0003	0.59695
-0.2182	0.00603		2.0004	0.59698
-0.2181	0.00601		2.0005	0.59708
-0.218	0.00598		2.0006	0.59721
-0.2179	0.00596		2.0007	0.59734
-0.2178	0.00593		2.0008	0.59753
-0.2177	0.0059		2.0009	0.59773
-0.2176	0.00588		2.001	0.59792
-0.2175	0.00585		2.0011	0.59815
-0.2174	0.00583		2.0012	0.59838
-0.2173	0.00583		2.0013	0.5986
-0.2172	0.00583		2.0014	0.59883
-0.2171	0.00583		2.0015	0.59906
-0.217	0.00583		2.0016	0.59932
-0.2169	0.00585		2.0017	0.59961
-0.2168	0.00585		2.0018	0.5999
-0.2167	0.00588		2.0019	0.60023
-0.2166	0.0059		2.002	0.60055
-0.2165	0.00593		2.0021	0.60091
-0.2164	0.00593		2.0022	0.60127
-0.2163	0.00596		2.0023	0.60166
-0.2162	0.00596		2.0024	0.60201
-0.2161	0.00598		2.0025	0.60237
-0.216	0.00598		2.0026	0.60273
-0.2159	0.00598		2.0027	0.60305
-0.2158	0.00601		2.0028	0.60335
-0.2157	0.00601		2.0029	0.60361
-0.2156	0.00601		2.003	0.60383
-0.2155	0.00603		2.0031	0.60403
-0.2154	0.00603		2.0032	0.60416
-0.2153	0.00606		2.0033	0.60426
-0.2152	0.00606		2.0034	0.60432
-0.2151	0.00609		2.0035	0.60435
-0.215	0.00609		2.0036	0.60432
-0.2149	0.00609		2.0037	0.60429
-0.2148	0.00609		2.0038	0.60422
-0.2147	0.00609		2.0039	0.60416
-0.2146	0.00609		2.004	0.60406
-0.2145	0.00606		2.0041	0.60396
-0.2144	0.00606		2.0042	0.6039
-0.2143	0.00603		2.0043	0.6038
-0.2142	0.00603		2.0044	0.6037
-0.2141	0.00601		2.0045	0.60361
-0.214	0.00601		2.0046	0.60351
-0.2139	0.00598		2.0047	0.60338
-0.2138	0.00598		2.0048	0.60328
-0.2137	0.00596		2.0049	0.60315
-0.2136	0.00596		2.005	0.60299
-0.2135	0.00596		2.0051	0.60283
-0.2134	0.00593		2.0052	0.60266
-0.2133	0.00593		2.0053	0.60244
-0.2132	0.00593		2.0054	0.60221
-0.2131	0.00593		2.0055	0.60195
-0.213	0.00593		2.0056	0.60169
-0.2129	0.00593		2.0057	0.6014
-0.2128	0.00593		2.0058	0.60111
-0.2127	0.00593		2.0059	0.60085
-0.2126	0.00596		2.006	0.60055
-0.2125	0.00596		2.0061	0.60029
-0.2124	0.00598		2.0062	0.60007
-0.2123	0.00598		2.0063	0.59984
-0.2122	0.00601		2.0064	0.59964
-0.2121	0.00601		2.0065	0.59951
-0.212	0.00601		2.0066	0.59938
-0.2119	0.00601		2.0067	0.59929
-0.2118	0.00601		2.0068	0.59922
-0.2117	0.00601		2.0069	0.59919
-0.2116	0.00598		2.007	0.59916
-0.2115	0.00598		2.0071	0.59919
-0.2114	0.00598		2.0072	0.59922
-0.2113	0.00596		2.0073	0.59929
-0.2112	0.00596		2.0074	0.59935
-0.2111	0.00593		2.0075	0.59945
-0.211	0.00593		2.0076	0.59958
-0.2109	0.00593		2.0077	0.59971
-0.2108	0.00593		2.0078	0.59987
-0.2107	0.00593		2.0079	0.60007
-0.2106	0.00593		2.008	0.60026
-0.2105	0.00593		2.0081	0.60049
-0.2104	0.00596		2.0082	0.60072
-0.2103	0.00596		2.0083	0.60098
-0.2102	0.00596		2.0084	0.6012
-0.2101	0.00593		2.0085	0.60146
-0.21	0.00593		2.0086	0.60172
-0.2099	0.00593		2.0087	0.60195
-0.2098	0.00593		2.0088	0.60214
-0.2097	0.00593		2.0089	0.60234
-0.2096	0.00593		2.009	0.60247
-0.2095	0.00596		2.0091	0.6026
-0.2094	0.00596		2.0092	0.60266
-0.2093	0.00596		2.0093	0.6027
-0.2092	0.00596		2.0094	0.60273
-0.2091	0.00598		2.0095	0.6027
-0.209	0.00598		2.0096	0.6027
-0.2089	0.00598		2.0097	0.60266
-0.2088	0.00601		2.0098	0.60266
-0.2087	0.00601		2.0099	0.60266
-0.2086	0.00601		2.01	0.60266
-0.2085	0.00598		2.0101	0.60273
-0.2084	0.00598		2.0102	0.60279
-0.2083	0.00598		2.0103	0.60289
-0.2082	0.00598		2.0104	0.60299
-0.2081	0.00596		2.0105	0.60315
-0.208	0.00596		2.0106	0.60328
-0.2079	0.00596		2.0107	0.60341
-0.2078	0.00596		2.0108	0.60357
-0.2077	0.00593		2.0109	0.6037
-0.2076	0.00593		2.011	0.60383
-0.2075	0.00593		2.0111	0.60396
-0.2074	0.00593		2.0112	0.60406
-0.2073	0.0059		2.0113	0.60413
-0.2072	0.0059		2.0114	0.60416
-0.2071	0.0059		2.0115	0.60416
-0.207	0.00588		2.0116	0.60413
-0.2069	0.00588		2.0117	0.60406
-0.2068	0.00588		2.0118	0.60393
-0.2067	0.00588		2.0119	0.6038
-0.2066	0.00588		2.012	0.60361
-0.2065	0.0059		2.0121	0.60338
-0.2064	0.0059		2.0122	0.60312
-0.2063	0.00593		2.0123	0.60283
-0.2062	0.00596		2.0124	0.6025
-0.2061	0.00598		2.0125	0.60218
-0.206	0.00601		2.0126	0.60185
-0.2059	0.00603		2.0127	0.6015
-0.2058	0.00603		2.0128	0.60117
-0.2057	0.00606		2.0129	0.60088
-0.2056	0.00606		2.013	0.60059
-0.2055	0.00606		2.0131	0.60029
-0.2054	0.00606		2.0132	0.6
-0.2053	0.00606		2.0133	0.59974
-0.2052	0.00603		2.0134	0.59948
-0.2051	0.00601		2.0135	0.59919
-0.205	0.00601		2.0136	0.59893
-0.2049	0.00598		2.0137	0.59864
-0.2048	0.00596		2.0138	0.59834
-0.2047	0.00596		2.0139	0.59805
-0.2046	0.00593		2.014	0.59776
-0.2045	0.0059		2.0141	0.59743
-0.2044	0.0059		2.0142	0.59714
-0.2043	0.00588		2.0143	0.59685
-0.2042	0.00585		2.0144	0.59659
-0.2041	0.00585		2.0145	0.59636
-0.204	0.00585		2.0146	0.59613
-0.2039	0.00583		2.0147	0.59594
-0.2038	0.00583		2.0148	0.59578
-0.2037	0.00583		2.0149	0.59568
-0.2036	0.00583		2.015	0.59558
-0.2035	0.00583		2.0151	0.59552
-0.2034	0.00583		2.0152	0.59548
-0.2033	0.00583		2.0153	0.59548
-0.2032	0.00585		2.0154	0.59552
-0.2031	0.00585		2.0155	0.59558
-0.203	0.00585		2.0156	0.59568
-0.2029	0.00588		2.0157	0.59578
-0.2028	0.00588		2.0158	0.59594
-0.2027	0.0059		2.0159	0.5961
-0.2026	0.0059		2.016	0.5963
-0.2025	0.00593		2.0161	0.59652
-0.2024	0.00593		2.0162	0.59672
-0.2023	0.00596		2.0163	0.59695
-0.2022	0.00598		2.0164	0.59714
-0.2021	0.00598		2.0165	0.59734
-0.202	0.00601		2.0166	0.59753
-0.2019	0.00603		2.0167	0.59769
-0.2018	0.00603		2.0168	0.59789
-0.2017	0.00603		2.0169	0.59805
-0.2016	0.00606		2.017	0.59821
-0.2015	0.00606		2.0171	0.59841
-0.2014	0.00606		2.0172	0.5986
-0.2013	0.00606		2.0173	0.59886
-0.2012	0.00606		2.0174	0.59912
-0.2011	0.00606		2.0175	0.59945
-0.201	0.00606		2.0176	0.59981
-0.2009	0.00606		2.0177	0.6002
-0.2008	0.00606		2.0178	0.60059
-0.2007	0.00606		2.0179	0.60101
-0.2006	0.00606		2.018	0.60143
-0.2005	0.00603		2.0181	0.60185
-0.2004	0.00603		2.0182	0.60224
-0.2003	0.00603		2.0183	0.6026
-0.2002	0.00603		2.0184	0.60292
-0.2001	0.00601		2.0185	0.60322
-0.2	0.00601		2.0186	0.60344
-0.1999	0.00598		2.0187	0.60364
-0.1998	0.00596		2.0188	0.60383
-0.1997	0.00596		2.0189	0.60396
-0.1996	0.00593		2.019	0.60409
-0.1995	0.00593		2.0191	0.60422
-0.1994	0.0059		2.0192	0.60432
-0.1993	0.0059		2.0193	0.60445
-0.1992	0.0059		2.0194	0.60455
-0.1991	0.0059		2.0195	0.60465
-0.199	0.0059		2.0196	0.60474
-0.1989	0.00593		2.0197	0.60481
-0.1988	0.00593		2.0198	0.60487
-0.1987	0.00593		2.0199	0.60491
-0.1986	0.00596		2.02	0.60494
-0.1985	0.00596		2.0201	0.60497
-0.1984	0.00598		2.0202	0.60497
-0.1983	0.00598		2.0203	0.60497
-0.1982	0.00601		2.0204	0.60497
-0.1981	0.00601		2.0205	0.605
-0.198	0.00601		2.0206	0.605
-0.1979	0.00603		2.0207	0.60504
-0.1978	0.00603		2.0208	0.60504
-0.1977	0.00603		2.0209	0.60507
-0.1976	0.00603		2.021	0.6051
-0.1975	0.00603		2.0211	0.6051
-0.1974	0.00603		2.0212	0.6051
-0.1973	0.00603		2.0213	0.60507
-0.1972	0.00603		2.0214	0.60507
-0.1971	0.00603		2.0215	0.60504
-0.197	0.00603		2.0216	0.60497
-0.1969	0.00603		2.0217	0.60494
-0.1968	0.00603		2.0218	0.60487
-0.1967	0.00601		2.0219	0.60481
-0.1966	0.00601		2.022	0.60478
-0.1965	0.00598		2.0221	0.60471
-0.1964	0.00598		2.0222	0.60465
-0.1963	0.00596		2.0223	0.60458
-0.1962	0.00593		2.0224	0.60452
-0.1961	0.0059		2.0225	0.60445
-0.196	0.00588		2.0226	0.60439
-0.1959	0.00585		2.0227	0.60432
-0.1958	0.00583		2.0228	0.60426
-0.1957	0.0058		2.0229	0.60422
-0.1956	0.0058		2.023	0.60416
-0.1955	0.00578		2.0231	0.60409
-0.1954	0.00578		2.0232	0.60403
-0.1953	0.00575		2.0233	0.60393
-0.1952	0.00575		2.0234	0.60387
-0.1951	0.00575		2.0235	0.60374
-0.195	0.00578		2.0236	0.60361
-0.1949	0.00578		2.0237	0.60348
-0.1948	0.00578		2.0238	0.60331
-0.1947	0.0058		2.0239	0.60312
-0.1946	0.0058		2.024	0.60292
-0.1945	0.00583		2.0241	0.60273
-0.1944	0.00583		2.0242	0.60253
-0.1943	0.00585		2.0243	0.60237
-0.1942	0.00585		2.0244	0.60221
-0.1941	0.00585		2.0245	0.60211
-0.194	0.00585		2.0246	0.60201
-0.1939	0.00583		2.0247	0.60198
-0.1938	0.00583		2.0248	0.60198
-0.1937	0.00583		2.0249	0.60201
-0.1936	0.0058		2.025	0.60205
-0.1935	0.0058		2.0251	0.60214
-0.1934	0.00578		2.0252	0.60221
-0.1933	0.00578		2.0253	0.60231
-0.1932	0.00578		2.0254	0.6024
-0.1931	0.00578		2.0255	0.60253
-0.193	0.00578		2.0256	0.6026
-0.1929	0.00578		2.0257	0.6027
-0.1928	0.00578		2.0258	0.60276
-0.1927	0.0058		2.0259	0.60279
-0.1926	0.0058		2.026	0.60279
-0.1925	0.0058		2.0261	0.60279
-0.1924	0.00583		2.0262	0.60276
-0.1923	0.00585		2.0263	0.60273
-0.1922	0.00585		2.0264	0.60266
-0.1921	0.00588		2.0265	0.6026
-0.192	0.0059		2.0266	0.6025
-0.1919	0.0059		2.0267	0.60244
-0.1918	0.00593		2.0268	0.60237
-0.1917	0.00593		2.0269	0.60231
-0.1916	0.00596		2.027	0.60227
-0.1915	0.00596		2.0271	0.60227
-0.1914	0.00596		2.0272	0.60227
-0.1913	0.00596		2.0273	0.60227
-0.1912	0.00593		2.0274	0.60227
-0.1911	0.00593		2.0275	0.60227
-0.191	0.0059		2.0276	0.60227
-0.1909	0.0059		2.0277	0.60227
-0.1908	0.00588		2.0278	0.60224
-0.1907	0.00588		2.0279	0.60218
-0.1906	0.00588		2.028	0.60211
-0.1905	0.00588		2.0281	0.60201
-0.1904	0.00585		2.0282	0.60188
-0.1903	0.00588		2.0283	0.60176
-0.1902	0.00588		2.0284	0.60159
-0.1901	0.00588		2.0285	0.60146
-0.19	0.00588		2.0286	0.6013
-0.1899	0.00588		2.0287	0.60114
-0.1898	0.00585		2.0288	0.60101
-0.1897	0.00585		2.0289	0.60088
-0.1896	0.00585		2.029	0.60075
-0.1895	0.00583		2.0291	0.60065
-0.1894	0.00583		2.0292	0.60059
-0.1893	0.00583		2.0293	0.60049
-0.1892	0.0058		2.0294	0.60042
-0.1891	0.0058		2.0295	0.60036
-0.189	0.00583		2.0296	0.60029
-0.1889	0.00583		2.0297	0.60023
-0.1888	0.00583		2.0298	0.60016
-0.1887	0.00585		2.0299	0.60007
-0.1886	0.00588		2.03	0.59997
-0.1885	0.0059		2.0301	0.59987
-0.1884	0.00593		2.0302	0.59974
-0.1883	0.00593		2.0303	0.59961
-0.1882	0.00596		2.0304	0.59948
-0.1881	0.00596		2.0305	0.59935
-0.188	0.00598		2.0306	0.59925
-0.1879	0.00598		2.0307	0.59919
-0.1878	0.00598		2.0308	0.59912
-0.1877	0.00596		2.0309	0.59912
-0.1876	0.00596		2.031	0.59912
-0.1875	0.00593		2.0311	0.59916
-0.1874	0.00593		2.0312	0.59922
-0.1873	0.00593		2.0313	0.59929
-0.1872	0.0059		2.0314	0.59938
-0.1871	0.0059		2.0315	0.59945
-0.187	0.00588		2.0316	0.59951
-0.1869	0.00588		2.0317	0.59955
-0.1868	0.00588		2.0318	0.59955
-0.1867	0.00585		2.0319	0.59955
-0.1866	0.00585		2.032	0.59951
-0.1865	0.00585		2.0321	0.59945
-0.1864	0.00585		2.0322	0.59938
-0.1863	0.00583		2.0323	0.59929
-0.1862	0.00583		2.0324	0.59922
-0.1861	0.00583		2.0325	0.59912
-0.186	0.00583		2.0326	0.59906
-0.1859	0.00583		2.0327	0.59899
-0.1858	0.00583		2.0328	0.59893
-0.1857	0.00585		2.0329	0.59886
-0.1856	0.00585		2.033	0.5988
-0.1855	0.00585		2.0331	0.59877
-0.1854	0.00588		2.0332	0.59873
-0.1853	0.00588		2.0333	0.59873
-0.1852	0.0059		2.0334	0.59873
-0.1851	0.0059		2.0335	0.59877
-0.185	0.00593		2.0336	0.5988
-0.1849	0.00593		2.0337	0.59883
-0.1848	0.00593		2.0338	0.5989
-0.1847	0.00596		2.0339	0.59899
-0.1846	0.00596		2.034	0.59909
-0.1845	0.00596		2.0341	0.59919
-0.1844	0.00596		2.0342	0.59929
-0.1843	0.00596		2.0343	0.59942
-0.1842	0.00596		2.0344	0.59955
-0.1841	0.00596		2.0345	0.59968
-0.184	0.00596		2.0346	0.59981
-0.1839	0.00596		2.0347	0.59997
-0.1838	0.00598		2.0348	0.6001
-0.1837	0.00598		2.0349	0.60023
-0.1836	0.00598		2.035	0.60033
-0.1835	0.00601		2.0351	0.60042
-0.1834	0.00601		2.0352	0.60052
-0.1833	0.00603		2.0353	0.60059
-0.1832	0.00603		2.0354	0.60062
-0.1831	0.00603		2.0355	0.60062
-0.183	0.00603		2.0356	0.60062
-0.1829	0.00603		2.0357	0.60062
-0.1828	0.00603		2.0358	0.60059
-0.1827	0.00601		2.0359	0.60055
-0.1826	0.00601		2.036	0.60052
-0.1825	0.00598		2.0361	0.60049
-0.1824	0.00598		2.0362	0.60049
-0.1823	0.00596		2.0363	0.60049
-0.1822	0.00593		2.0364	0.60049
-0.1821	0.00593		2.0365	0.60049
-0.182	0.0059		2.0366	0.60052
-0.1819	0.0059		2.0367	0.60055
-0.1818	0.0059		2.0368	0.60059
-0.1817	0.00588		2.0369	0.60062
-0.1816	0.00588		2.037	0.60065
-0.1815	0.00588		2.0371	0.60072
-0.1814	0.00585		2.0372	0.60075
-0.1813	0.00585		2.0373	0.60081
-0.1812	0.00583		2.0374	0.60085
-0.1811	0.00583		2.0375	0.60091
-0.181	0.0058		2.0376	0.60098
-0.1809	0.0058		2.0377	0.60101
-0.1808	0.0058		2.0378	0.60107
-0.1807	0.00578		2.0379	0.60111
-0.1806	0.00578		2.038	0.60114
-0.1805	0.00578		2.0381	0.60114
-0.1804	0.00578		2.0382	0.60114
-0.1803	0.00578		2.0383	0.60114
-0.1802	0.00578		2.0384	0.60111
-0.1801	0.00578		2.0385	0.60104
-0.18	0.00578		2.0386	0.60098
-0.1799	0.00578		2.0387	0.60088
-0.1798	0.0058		2.0388	0.60075
-0.1797	0.0058		2.0389	0.60059
-0.1796	0.00583		2.039	0.60042
-0.1795	0.00585		2.0391	0.60026
-0.1794	0.00585		2.0392	0.60003
-0.1793	0.00588		2.0393	0.59984
-0.1792	0.00588		2.0394	0.59961
-0.1791	0.0059		2.0395	0.59938
-0.179	0.0059		2.0396	0.59919
-0.1789	0.0059		2.0397	0.59896
-0.1788	0.00593		2.0398	0.59877
-0.1787	0.0059		2.0399	0.5986
-0.1786	0.0059		2.04	0.59841
-0.1785	0.0059		2.0401	0.59825
-0.1784	0.0059		2.0402	0.59812
-0.1783	0.00588		2.0403	0.59799
-0.1782	0.00588		2.0404	0.59786
-0.1781	0.00588		2.0405	0.59776
-0.178	0.00588		2.0406	0.59769
-0.1779	0.00588		2.0407	0.59763
-0.1778	0.0059		2.0408	0.5976
-0.1777	0.0059		2.0409	0.59756
-0.1776	0.00593		2.041	0.59756
-0.1775	0.00593		2.0411	0.59756
-0.1774	0.00596		2.0412	0.5976
-0.1773	0.00596		2.0413	0.59763
-0.1772	0.00598		2.0414	0.59769
-0.1771	0.00598		2.0415	0.59776
-0.177	0.00598		2.0416	0.59782
-0.1769	0.00598		2.0417	0.59786
-0.1768	0.00598		2.0418	0.59792
-0.1767	0.00598		2.0419	0.59795
-0.1766	0.00598		2.042	0.59795
-0.1765	0.00596		2.0421	0.59795
-0.1764	0.00596		2.0422	0.59795
-0.1763	0.00596		2.0423	0.59792
-0.1762	0.00593		2.0424	0.59789
-0.1761	0.00593		2.0425	0.59786
-0.176	0.00593		2.0426	0.59779
-0.1759	0.00596		2.0427	0.59776
-0.1758	0.00596		2.0428	0.59769
-0.1757	0.00596		2.0429	0.59766
-0.1756	0.00598		2.043	0.59766
-0.1755	0.00598		2.0431	0.59766
-0.1754	0.00601		2.0432	0.59766
-0.1753	0.00601		2.0433	0.59773
-0.1752	0.00603		2.0434	0.59779
-0.1751	0.00603		2.0435	0.59786
-0.175	0.00603		2.0436	0.59795
-0.1749	0.00603		2.0437	0.59808
-0.1748	0.00603		2.0438	0.59821
-0.1747	0.00603		2.0439	0.59834
-0.1746	0.00603		2.044	0.59851
-0.1745	0.00601		2.0441	0.59864
-0.1744	0.00601		2.0442	0.59877
-0.1743	0.00601		2.0443	0.59886
-0.1742	0.00601		2.0444	0.59896
-0.1741	0.00598		2.0445	0.59899
-0.174	0.00598		2.0446	0.59899
-0.1739	0.00598		2.0447	0.59899
-0.1738	0.00596		2.0448	0.59893
-0.1737	0.00596		2.0449	0.59883
-0.1736	0.00593		2.045	0.5987
-0.1735	0.00593		2.0451	0.59854
-0.1734	0.0059		2.0452	0.59838
-0.1733	0.0059		2.0453	0.59821
-0.1732	0.00588		2.0454	0.59802
-0.1731	0.00588		2.0455	0.59786
-0.173	0.00585		2.0456	0.59773
-0.1729	0.00585		2.0457	0.5976
-0.1728	0.00585		2.0458	0.59747
-0.1727	0.00588		2.0459	0.5974
-0.1726	0.00588		2.046	0.59734
-0.1725	0.00588		2.0461	0.59727
-0.1724	0.0059		2.0462	0.59724
-0.1723	0.00593		2.0463	0.59724
-0.1722	0.00593		2.0464	0.59724
-0.1721	0.00596		2.0465	0.59724
-0.172	0.00596		2.0466	0.59724
-0.1719	0.00596		2.0467	0.59724
-0.1718	0.00598		2.0468	0.59727
-0.1717	0.00598		2.0469	0.5973
-0.1716	0.00598		2.047	0.59737
-0.1715	0.00598		2.0471	0.59743
-0.1714	0.00598		2.0472	0.5975
-0.1713	0.00596		2.0473	0.5976
-0.1712	0.00596		2.0474	0.59773
-0.1711	0.00596		2.0475	0.59789
-0.171	0.00596		2.0476	0.59805
-0.1709	0.00593		2.0477	0.59821
-0.1708	0.00593		2.0478	0.59841
-0.1707	0.0059		2.0479	0.5986
-0.1706	0.0059		2.048	0.59883
-0.1705	0.00588		2.0481	0.59903
-0.1704	0.00585		2.0482	0.59922
-0.1703	0.00585		2.0483	0.59942
-0.1702	0.00583		2.0484	0.59958
-0.1701	0.00583		2.0485	0.59971
-0.17	0.00583		2.0486	0.59984
-0.1699	0.00583		2.0487	0.5999
-0.1698	0.00583		2.0488	0.59997
-0.1697	0.00583		2.0489	0.6
-0.1696	0.00585		2.049	0.59997
-0.1695	0.00588		2.0491	0.59994
-0.1694	0.00588		2.0492	0.5999
-0.1693	0.0059		2.0493	0.59984
-0.1692	0.0059		2.0494	0.59977
-0.1691	0.00593		2.0495	0.59974
-0.169	0.00593		2.0496	0.59971
-0.1689	0.00593		2.0497	0.59968
-0.1688	0.0059		2.0498	0.59971
-0.1687	0.0059		2.0499	0.59974
-0.1686	0.00588		2.05	0.59981
-0.1685	0.00588		2.0501	0.5999
-0.1684	0.00585		2.0502	0.60007
-0.1683	0.00585		2.0503	0.6002
-0.1682	0.00585		2.0504	0.60039
-0.1681	0.00585		2.0505	0.60059
-0.168	0.00585		2.0506	0.60078
-0.1679	0.00585		2.0507	0.60098
-0.1678	0.00588		2.0508	0.60117
-0.1677	0.0059		2.0509	0.60137
-0.1676	0.00593		2.051	0.60156
-0.1675	0.00596		2.0511	0.60176
-0.1674	0.00598		2.0512	0.60195
-0.1673	0.00601		2.0513	0.60211
-0.1672	0.00601		2.0514	0.60231
-0.1671	0.00603		2.0515	0.60244
-0.167	0.00606		2.0516	0.6026
-0.1669	0.00606		2.0517	0.60273
-0.1668	0.00606		2.0518	0.60286
-0.1667	0.00606		2.0519	0.60296
-0.1666	0.00603		2.052	0.60309
-0.1665	0.00603		2.0521	0.60322
-0.1664	0.00603		2.0522	0.60335
-0.1663	0.00601		2.0523	0.60348
-0.1662	0.00598		2.0524	0.60367
-0.1661	0.00598		2.0525	0.60383
-0.166	0.00596		2.0526	0.60403
-0.1659	0.00593		2.0527	0.60426
-0.1658	0.00593		2.0528	0.60448
-0.1657	0.0059		2.0529	0.60468
-0.1656	0.0059		2.053	0.60491
-0.1655	0.00588		2.0531	0.6051
-0.1654	0.00585		2.0532	0.6053
-0.1653	0.00585		2.0533	0.60546
-0.1652	0.00583		2.0534	0.60559
-0.1651	0.00583		2.0535	0.60572
-0.165	0.00583		2.0536	0.60585
-0.1649	0.0058		2.0537	0.60598
-0.1648	0.0058		2.0538	0.60611
-0.1647	0.0058		2.0539	0.60627
-0.1646	0.0058		2.054	0.60647
-0.1645	0.00578		2.0541	0.60666
-0.1644	0.00578		2.0542	0.60692
-0.1643	0.00578		2.0543	0.60721
-0.1642	0.0058		2.0544	0.60751
-0.1641	0.0058		2.0545	0.60786
-0.164	0.0058		2.0546	0.60822
-0.1639	0.0058		2.0547	0.60858
-0.1638	0.00583		2.0548	0.6089
-0.1637	0.00583		2.0549	0.60923
-0.1636	0.00583		2.055	0.60952
-0.1635	0.00585		2.0551	0.60978
-0.1634	0.00585		2.0552	0.60997
-0.1633	0.00585		2.0553	0.61014
-0.1632	0.00585		2.0554	0.61023
-0.1631	0.00585		2.0555	0.61027
-0.163	0.00585		2.0556	0.61027
-0.1629	0.00585		2.0557	0.6102
-0.1628	0.00585		2.0558	0.61014
-0.1627	0.00585		2.0559	0.61001
-0.1626	0.00585		2.056	0.60988
-0.1625	0.00583		2.0561	0.60971
-0.1624	0.00583		2.0562	0.60955
-0.1623	0.00583		2.0563	0.60936
-0.1622	0.00583		2.0564	0.60916
-0.1621	0.0058		2.0565	0.60894
-0.162	0.0058		2.0566	0.60874
-0.1619	0.0058		2.0567	0.60855
-0.1618	0.0058		2.0568	0.60832
-0.1617	0.0058		2.0569	0.60809
-0.1616	0.00583		2.057	0.6079
-0.1615	0.00583		2.0571	0.60767
-0.1614	0.00585		2.0572	0.60747
-0.1613	0.00588		2.0573	0.60728
-0.1612	0.0059		2.0574	0.60705
-0.1611	0.00593		2.0575	0.60686
-0.161	0.00596		2.0576	0.60666
-0.1609	0.00596		2.0577	0.60647
-0.1608	0.00598		2.0578	0.60624
-0.1607	0.00598		2.0579	0.60601
-0.1606	0.00598		2.058	0.60575
-0.1605	0.00598		2.0581	0.60549
-0.1604	0.00596		2.0582	0.60523
-0.1603	0.00596		2.0583	0.60491
-0.1602	0.00593		2.0584	0.60461
-0.1601	0.0059		2.0585	0.60426
-0.16	0.00588		2.0586	0.60393
-0.1599	0.00588		2.0587	0.60357
-0.1598	0.00585		2.0588	0.60325
-0.1597	0.00583		2.0589	0.60289
-0.1596	0.00583		2.059	0.6026
-0.1595	0.00583		2.0591	0.60227
-0.1594	0.00583		2.0592	0.60198
-0.1593	0.00583		2.0593	0.60172
-0.1592	0.00583		2.0594	0.60146
-0.1591	0.00583		2.0595	0.60124
-0.159	0.00583		2.0596	0.60101
-0.1589	0.00583		2.0597	0.60078
-0.1588	0.00585		2.0598	0.60055
-0.1587	0.00585		2.0599	0.60036
-0.1586	0.00585		2.06	0.60016
-0.1585	0.00585		2.0601	0.59997
-0.1584	0.00585		2.0602	0.59977
-0.1583	0.00585		2.0603	0.59961
-0.1582	0.00585		2.0604	0.59945
-0.1581	0.00585		2.0605	0.59932
-0.158	0.00585		2.0606	0.59919
-0.1579	0.00585		2.0607	0.59909
-0.1578	0.00585		2.0608	0.59899
-0.1577	0.00585		2.0609	0.59893
-0.1576	0.00585		2.061	0.59886
-0.1575	0.00585		2.0611	0.59886
-0.1574	0.00583		2.0612	0.59883
-0.1573	0.00583		2.0613	0.59886
-0.1572	0.00583		2.0614	0.5989
-0.1571	0.00583		2.0615	0.59896
-0.157	0.00583		2.0616	0.59903
-0.1569	0.00583		2.0617	0.59916
-0.1568	0.00583		2.0618	0.59929
-0.1567	0.00585		2.0619	0.59945
-0.1566	0.00585		2.062	0.59964
-0.1565	0.00585		2.0621	0.59984
-0.1564	0.00585		2.0622	0.60003
-0.1563	0.00588		2.0623	0.60026
-0.1562	0.00588		2.0624	0.60046
-0.1561	0.00588		2.0625	0.60065
-0.156	0.00588		2.0626	0.60085
-0.1559	0.00588		2.0627	0.60101
-0.1558	0.00588		2.0628	0.60114
-0.1557	0.00588		2.0629	0.60127
-0.1556	0.00585		2.063	0.6014
-0.1555	0.00585		2.0631	0.6015
-0.1554	0.00585		2.0632	0.60156
-0.1553	0.00585		2.0633	0.60166
-0.1552	0.00585		2.0634	0.60176
-0.1551	0.00588		2.0635	0.60182
-0.155	0.00588		2.0636	0.60188
-0.1549	0.00588		2.0637	0.60195
-0.1548	0.00588		2.0638	0.60198
-0.1547	0.0059		2.0639	0.60201
-0.1546	0.0059		2.064	0.60201
-0.1545	0.0059		2.0641	0.60201
-0.1544	0.0059		2.0642	0.60198
-0.1543	0.0059		2.0643	0.60188
-0.1542	0.00588		2.0644	0.60179
-0.1541	0.00588		2.0645	0.60169
-0.154	0.00588		2.0646	0.60156
-0.1539	0.00588		2.0647	0.6014
-0.1538	0.00585		2.0648	0.60124
-0.1537	0.00585		2.0649	0.60111
-0.1536	0.00585		2.065	0.60094
-0.1535	0.00588		2.0651	0.60078
-0.1534	0.00588		2.0652	0.60065
-0.1533	0.00588		2.0653	0.60055
-0.1532	0.00588		2.0654	0.60046
-0.1531	0.00588		2.0655	0.60036
-0.153	0.00588		2.0656	0.60033
-0.1529	0.00588		2.0657	0.60033
-0.1528	0.00588		2.0658	0.60033
-0.1527	0.00588		2.0659	0.60039
-0.1526	0.00588		2.066	0.60049
-0.1525	0.00585		2.0661	0.60059
-0.1524	0.00585		2.0662	0.60075
-0.1523	0.00588		2.0663	0.60091
-0.1522	0.00588		2.0664	0.60107
-0.1521	0.00588		2.0665	0.60124
-0.152	0.00588		2.0666	0.60137
-0.1519	0.0059		2.0667	0.60153
-0.1518	0.0059		2.0668	0.60166
-0.1517	0.00593		2.0669	0.60172
-0.1516	0.00593		2.067	0.60182
-0.1515	0.00593		2.0671	0.60185
-0.1514	0.00593		2.0672	0.60185
-0.1513	0.00593		2.0673	0.60185
-0.1512	0.00593		2.0674	0.60182
-0.1511	0.00593		2.0675	0.60179
-0.151	0.0059		2.0676	0.60172
-0.1509	0.0059		2.0677	0.60166
-0.1508	0.0059		2.0678	0.60156
-0.1507	0.00588		2.0679	0.6015
-0.1506	0.00588		2.068	0.6014
-0.1505	0.00588		2.0681	0.60133
-0.1504	0.00588		2.0682	0.60124
-0.1503	0.00588		2.0683	0.60114
-0.1502	0.00588		2.0684	0.60107
-0.1501	0.00588		2.0685	0.60098
-0.15	0.00588		2.0686	0.60088
-0.1499	0.00588		2.0687	0.60078
-0.1498	0.00588		2.0688	0.60072
-0.1497	0.00588		2.0689	0.60062
-0.1496	0.00588		2.069	0.60052
-0.1495	0.00588		2.0691	0.60042
-0.1494	0.00585		2.0692	0.60033
-0.1493	0.00585		2.0693	0.60023
-0.1492	0.00585		2.0694	0.6001
-0.1491	0.00585		2.0695	0.6
-0.149	0.00585		2.0696	0.59987
-0.1489	0.00585		2.0697	0.59974
-0.1488	0.00585		2.0698	0.59961
-0.1487	0.00585		2.0699	0.59948
-0.1486	0.00588		2.07	0.59938
-0.1485	0.00588		2.0701	0.59925
-0.1484	0.0059		2.0702	0.59919
-0.1483	0.0059		2.0703	0.59912
-0.1482	0.0059		2.0704	0.59906
-0.1481	0.00593		2.0705	0.59906
-0.148	0.00593		2.0706	0.59906
-0.1479	0.00593		2.0707	0.59912
-0.1478	0.00593		2.0708	0.59919
-0.1477	0.00593		2.0709	0.59929
-0.1476	0.00593		2.071	0.59938
-0.1475	0.00593		2.0711	0.59955
-0.1474	0.00593		2.0712	0.59968
-0.1473	0.00593		2.0713	0.59981
-0.1472	0.00593		2.0714	0.59994
-0.1471	0.0059		2.0715	0.60003
-0.147	0.0059		2.0716	0.60013
-0.1469	0.0059		2.0717	0.6002
-0.1468	0.0059		2.0718	0.6002
-0.1467	0.00588		2.0719	0.6002
-0.1466	0.00588		2.072	0.60016
-0.1465	0.00588		2.0721	0.60007
-0.1464	0.00585		2.0722	0.59997
-0.1463	0.00585		2.0723	0.59984
-0.1462	0.00585		2.0724	0.59968
-0.1461	0.00585		2.0725	0.59951
-0.146	0.00585		2.0726	0.59935
-0.1459	0.00585		2.0727	0.59919
-0.1458	0.00585		2.0728	0.59903
-0.1457	0.00588		2.0729	0.5989
-0.1456	0.0059		2.073	0.5988
-0.1455	0.00593		2.0731	0.5987
-0.1454	0.00596		2.0732	0.59864
-0.1453	0.00598		2.0733	0.5986
-0.1452	0.00601		2.0734	0.5986
-0.1451	0.00601		2.0735	0.5986
-0.145	0.00603		2.0736	0.59864
-0.1449	0.00603		2.0737	0.59867
-0.1448	0.00603		2.0738	0.59873
-0.1447	0.00601		2.0739	0.5988
-0.1446	0.00601		2.074	0.5989
-0.1445	0.00598		2.0741	0.59899
-0.1444	0.00596		2.0742	0.59912
-0.1443	0.00593		2.0743	0.59925
-0.1442	0.00593		2.0744	0.59938
-0.1441	0.0059		2.0745	0.59955
-0.144	0.0059		2.0746	0.59971
-0.1439	0.0059		2.0747	0.5999
-0.1438	0.00593		2.0748	0.6001
-0.1437	0.00593		2.0749	0.60029
-0.1436	0.00593		2.075	0.60046
-0.1435	0.00596		2.0751	0.60065
-0.1434	0.00596		2.0752	0.60081
-0.1433	0.00596		2.0753	0.60098
-0.1432	0.00596		2.0754	0.60111
-0.1431	0.00596		2.0755	0.60124
-0.143	0.00596		2.0756	0.6014
-0.1429	0.00593		2.0757	0.60153
-0.1428	0.00593		2.0758	0.60169
-0.1427	0.0059		2.0759	0.60185
-0.1426	0.0059		2.076	0.60205
-0.1425	0.0059		2.0761	0.60227
-0.1424	0.00588		2.0762	0.60257
-0.1423	0.00588		2.0763	0.60286
-0.1422	0.00588		2.0764	0.60318
-0.1421	0.0059		2.0765	0.60351
-0.142	0.0059		2.0766	0.60387
-0.1419	0.0059		2.0767	0.60422
-0.1418	0.00593		2.0768	0.60455
-0.1417	0.00593		2.0769	0.60484
-0.1416	0.00593		2.077	0.60507
-0.1415	0.00593		2.0771	0.6053
-0.1414	0.00593		2.0772	0.60543
-0.1413	0.00593		2.0773	0.60552
-0.1412	0.00593		2.0774	0.60556
-0.1411	0.00593		2.0775	0.60552
-0.141	0.0059		2.0776	0.60543
-0.1409	0.0059		2.0777	0.6053
-0.1408	0.0059		2.0778	0.60513
-0.1407	0.0059		2.0779	0.60491
-0.1406	0.0059		2.078	0.60468
-0.1405	0.0059		2.0781	0.60445
-0.1404	0.0059		2.0782	0.60419
-0.1403	0.0059		2.0783	0.60396
-0.1402	0.00593		2.0784	0.60377
-0.1401	0.00593		2.0785	0.60357
-0.14	0.00596		2.0786	0.60341
-0.1399	0.00596		2.0787	0.60325
-0.1398	0.00598		2.0788	0.60315
-0.1397	0.00598		2.0789	0.60309
-0.1396	0.00601		2.079	0.60302
-0.1395	0.00601		2.0791	0.60296
-0.1394	0.00601		2.0792	0.60292
-0.1393	0.00603		2.0793	0.60286
-0.1392	0.00603		2.0794	0.60276
-0.1391	0.00603		2.0795	0.60266
-0.139	0.00606		2.0796	0.6025
-0.1389	0.00606		2.0797	0.60234
-0.1388	0.00606		2.0798	0.60211
-0.1387	0.00606		2.0799	0.60188
-0.1386	0.00606		2.08	0.60163
-0.1385	0.00603		2.0801	0.60133
-0.1384	0.00603		2.0802	0.60107
-0.1383	0.00601		2.0803	0.60081
-0.1382	0.00598		2.0804	0.60052
-0.1381	0.00596		2.0805	0.60029
-0.138	0.00593		2.0806	0.60007
-0.1379	0.0059		2.0807	0.59984
-0.1378	0.00588		2.0808	0.59964
-0.1377	0.00585		2.0809	0.59948
-0.1376	0.00585		2.081	0.59935
-0.1375	0.00583		2.0811	0.59922
-0.1374	0.0058		2.0812	0.59916
-0.1373	0.0058		2.0813	0.59909
-0.1372	0.0058		2.0814	0.59906
-0.1371	0.0058		2.0815	0.59906
-0.137	0.0058		2.0816	0.59909
-0.1369	0.0058		2.0817	0.59912
-0.1368	0.0058		2.0818	0.59922
-0.1367	0.0058		2.0819	0.59929
-0.1366	0.0058		2.082	0.59938
-0.1365	0.0058		2.0821	0.59945
-0.1364	0.0058		2.0822	0.59951
-0.1363	0.0058		2.0823	0.59958
-0.1362	0.0058		2.0824	0.59958
-0.1361	0.0058		2.0825	0.59958
-0.136	0.0058		2.0826	0.59955
-0.1359	0.00578		2.0827	0.59948
-0.1358	0.00578		2.0828	0.59942
-0.1357	0.00578		2.0829	0.59935
-0.1356	0.00578		2.083	0.59929
-0.1355	0.00578		2.0831	0.59922
-0.1354	0.0058		2.0832	0.59919
-0.1353	0.0058		2.0833	0.59922
-0.1352	0.0058		2.0834	0.59925
-0.1351	0.00583		2.0835	0.59932
-0.135	0.00585		2.0836	0.59945
-0.1349	0.00585		2.0837	0.59958
-0.1348	0.00588		2.0838	0.59974
-0.1347	0.0059		2.0839	0.5999
-0.1346	0.00593		2.084	0.6001
-0.1345	0.00593		2.0841	0.60026
-0.1344	0.00596		2.0842	0.60042
-0.1343	0.00596		2.0843	0.60059
-0.1342	0.00598		2.0844	0.60072
-0.1341	0.00598		2.0845	0.60085
-0.134	0.00598		2.0846	0.60094
-0.1339	0.00596		2.0847	0.60107
-0.1338	0.00596		2.0848	0.60117
-0.1337	0.00596		2.0849	0.60127
-0.1336	0.00593		2.085	0.60137
-0.1335	0.00593		2.0851	0.60146
-0.1334	0.0059		2.0852	0.60156
-0.1333	0.0059		2.0853	0.60163
-0.1332	0.0059		2.0854	0.60172
-0.1331	0.0059		2.0855	0.60182
-0.133	0.0059		2.0856	0.60192
-0.1329	0.0059		2.0857	0.60201
-0.1328	0.0059		2.0858	0.60214
-0.1327	0.00593		2.0859	0.60227
-0.1326	0.00593		2.086	0.6024
-0.1325	0.00596		2.0861	0.60257
-0.1324	0.00596		2.0862	0.60279
-0.1323	0.00596		2.0863	0.60299
-0.1322	0.00596		2.0864	0.60322
-0.1321	0.00596		2.0865	0.60348
-0.132	0.00596		2.0866	0.60374
-0.1319	0.00596		2.0867	0.604
-0.1318	0.00593		2.0868	0.60422
-0.1317	0.00593		2.0869	0.60445
-0.1316	0.00593		2.087	0.60465
-0.1315	0.0059		2.0871	0.60481
-0.1314	0.0059		2.0872	0.60494
-0.1313	0.0059		2.0873	0.605
-0.1312	0.00588		2.0874	0.60504
-0.1311	0.00588		2.0875	0.605
-0.131	0.00588		2.0876	0.60494
-0.1309	0.00588		2.0877	0.60484
-0.1308	0.00588		2.0878	0.60474
-0.1307	0.00588		2.0879	0.60461
-0.1306	0.00585		2.088	0.60448
-0.1305	0.00585		2.0881	0.60439
-0.1304	0.00585		2.0882	0.60426
-0.1303	0.00588		2.0883	0.60416
-0.1302	0.00588		2.0884	0.60406
-0.1301	0.00588		2.0885	0.60396
-0.13	0.00588		2.0886	0.6039
-0.1299	0.00588		2.0887	0.6038
-0.1298	0.0059		2.0888	0.60374
-0.1297	0.0059		2.0889	0.60364
-0.1296	0.0059		2.089	0.60357
-0.1295	0.00593		2.0891	0.60348
-0.1294	0.00593		2.0892	0.60341
-0.1293	0.00593		2.0893	0.60331
-0.1292	0.00593		2.0894	0.60322
-0.1291	0.00593		2.0895	0.60312
-0.129	0.00593		2.0896	0.60299
-0.1289	0.00593		2.0897	0.60286
-0.1288	0.00593		2.0898	0.6027
-0.1287	0.00593		2.0899	0.6025
-0.1286	0.0059		2.09	0.60227
-0.1285	0.0059		2.0901	0.60205
-0.1284	0.0059		2.0902	0.60182
-0.1283	0.00588		2.0903	0.60156
-0.1282	0.00585		2.0904	0.6013
-0.1281	0.00585		2.0905	0.60104
-0.128	0.00583		2.0906	0.60078
-0.1279	0.00583		2.0907	0.60059
-0.1278	0.00583		2.0908	0.60039
-0.1277	0.0058		2.0909	0.60023
-0.1276	0.0058		2.091	0.6001
-0.1275	0.0058		2.0911	0.60003
-0.1274	0.00583		2.0912	0.59997
-0.1273	0.00583		2.0913	0.59994
-0.1272	0.00585		2.0914	0.59994
-0.1271	0.00585		2.0915	0.59994
-0.127	0.00588		2.0916	0.6
-0.1269	0.0059		2.0917	0.60007
-0.1268	0.0059		2.0918	0.60013
-0.1267	0.00593		2.0919	0.60026
-0.1266	0.00593		2.092	0.60042
-0.1265	0.00593		2.0921	0.60059
-0.1264	0.00596		2.0922	0.60081
-0.1263	0.00596		2.0923	0.60104
-0.1262	0.00596		2.0924	0.6013
-0.1261	0.00596		2.0925	0.60159
-0.126	0.00596		2.0926	0.60185
-0.1259	0.00598		2.0927	0.60211
-0.1258	0.00598		2.0928	0.6024
-0.1257	0.00598		2.0929	0.60263
-0.1256	0.00598		2.093	0.60283
-0.1255	0.00596		2.0931	0.60302
-0.1254	0.00596		2.0932	0.60315
-0.1253	0.00596		2.0933	0.60325
-0.1252	0.00593		2.0934	0.60331
-0.1251	0.00593		2.0935	0.60331
-0.125	0.00593		2.0936	0.60331
-0.1249	0.0059		2.0937	0.60328
-0.1248	0.0059		2.0938	0.60322
-0.1247	0.0059		2.0939	0.60315
-0.1246	0.00588		2.094	0.60305
-0.1245	0.00588		2.0941	0.60299
-0.1244	0.00588		2.0942	0.60289
-0.1243	0.00588		2.0943	0.60279
-0.1242	0.00588		2.0944	0.6027
-0.1241	0.0059		2.0945	0.6026
-0.124	0.0059		2.0946	0.6025
-0.1239	0.0059		2.0947	0.6024
-0.1238	0.00593		2.0948	0.60227
-0.1237	0.00593		2.0949	0.60218
-0.1236	0.00596		2.095	0.60205
-0.1235	0.00598		2.0951	0.60192
-0.1234	0.00598		2.0952	0.60179
-0.1233	0.00598		2.0953	0.60166
-0.1232	0.00601		2.0954	0.60156
-0.1231	0.00601		2.0955	0.6015
-0.123	0.00598		2.0956	0.60143
-0.1229	0.00598		2.0957	0.6014
-0.1228	0.00598		2.0958	0.6014
-0.1227	0.00596		2.0959	0.60143
-0.1226	0.00593		2.096	0.60146
-0.1225	0.0059		2.0961	0.60153
-0.1224	0.0059		2.0962	0.60156
-0.1223	0.00588		2.0963	0.60159
-0.1222	0.00585		2.0964	0.60166
-0.1221	0.00585		2.0965	0.60166
-0.122	0.00583		2.0966	0.60166
-0.1219	0.00583		2.0967	0.60166
-0.1218	0.0058		2.0968	0.60163
-0.1217	0.0058		2.0969	0.60159
-0.1216	0.0058		2.097	0.60156
-0.1215	0.0058		2.0971	0.60153
-0.1214	0.0058		2.0972	0.6015
-0.1213	0.0058		2.0973	0.6015
-0.1212	0.0058		2.0974	0.6015
-0.1211	0.0058		2.0975	0.6015
-0.121	0.0058		2.0976	0.6015
-0.1209	0.00583		2.0977	0.60153
-0.1208	0.00583		2.0978	0.60156
-0.1207	0.00585		2.0979	0.60159
-0.1206	0.00588		2.098	0.60166
-0.1205	0.0059		2.0981	0.60172
-0.1204	0.00593		2.0982	0.60179
-0.1203	0.00596		2.0983	0.60188
-0.1202	0.00598		2.0984	0.60198
-0.1201	0.00601		2.0985	0.60208
-0.12	0.00603		2.0986	0.60221
-0.1199	0.00606		2.0987	0.60234
-0.1198	0.00606		2.0988	0.60247
-0.1197	0.00609		2.0989	0.6026
-0.1196	0.00609		2.099	0.60276
-0.1195	0.00609		2.0991	0.60289
-0.1194	0.00609		2.0992	0.60299
-0.1193	0.00609		2.0993	0.60309
-0.1192	0.00606		2.0994	0.60318
-0.1191	0.00603		2.0995	0.60325
-0.119	0.00601		2.0996	0.60328
-0.1189	0.00598		2.0997	0.60331
-0.1188	0.00596		2.0998	0.60335
-0.1187	0.00593		2.0999	0.60335
-0.1186	0.0059		2.1	0.60335
-0.1185	0.00588		2.1001	0.60335
-0.1184	0.00588		2.1002	0.60331
-0.1183	0.00585		2.1003	0.60331
-0.1182	0.00585		2.1004	0.60328
-0.1181	0.00585		2.1005	0.60328
-0.118	0.00585		2.1006	0.60328
-0.1179	0.00588		2.1007	0.60331
-0.1178	0.00588		2.1008	0.60331
-0.1177	0.0059		2.1009	0.60331
-0.1176	0.0059		2.101	0.60331
-0.1175	0.0059		2.1011	0.60328
-0.1174	0.00593		2.1012	0.60325
-0.1173	0.00593		2.1013	0.60318
-0.1172	0.00593		2.1014	0.60305
-0.1171	0.00593		2.1015	0.60292
-0.117	0.00593		2.1016	0.60273
-0.1169	0.00593		2.1017	0.60253
-0.1168	0.00593		2.1018	0.60227
-0.1167	0.00593		2.1019	0.60198
-0.1166	0.00593		2.102	0.60169
-0.1165	0.0059		2.1021	0.60133
-0.1164	0.0059		2.1022	0.60101
-0.1163	0.0059		2.1023	0.60065
-0.1162	0.0059		2.1024	0.60033
-0.1161	0.0059		2.1025	0.59997
-0.116	0.00588		2.1026	0.59964
-0.1159	0.00588		2.1027	0.59935
-0.1158	0.00588		2.1028	0.59906
-0.1157	0.0059		2.1029	0.59883
-0.1156	0.0059		2.103	0.5986
-0.1155	0.0059		2.1031	0.59841
-0.1154	0.00593		2.1032	0.59828
-0.1153	0.00593		2.1033	0.59818
-0.1152	0.00596		2.1034	0.59812
-0.1151	0.00596		2.1035	0.59812
-0.115	0.00596		2.1036	0.59812
-0.1149	0.00596		2.1037	0.59818
-0.1148	0.00596		2.1038	0.59828
-0.1147	0.00596		2.1039	0.59838
-0.1146	0.00596		2.104	0.59851
-0.1145	0.00596		2.1041	0.59867
-0.1144	0.00596		2.1042	0.59883
-0.1143	0.00596		2.1043	0.59903
-0.1142	0.00593		2.1044	0.59922
-0.1141	0.00593		2.1045	0.59945
-0.114	0.00593		2.1046	0.59964
-0.1139	0.00593		2.1047	0.5999
-0.1138	0.00593		2.1048	0.60013
-0.1137	0.00593		2.1049	0.60036
-0.1136	0.00593		2.105	0.60059
-0.1135	0.0059		2.1051	0.60085
-0.1134	0.0059		2.1052	0.60107
-0.1133	0.0059		2.1053	0.6013
-0.1132	0.00593		2.1054	0.60153
-0.1131	0.00593		2.1055	0.60172
-0.113	0.00593		2.1056	0.60192
-0.1129	0.00593		2.1057	0.60208
-0.1128	0.00593		2.1058	0.60224
-0.1127	0.00593		2.1059	0.60237
-0.1126	0.00596		2.106	0.6025
-0.1125	0.00596		2.1061	0.60257
-0.1124	0.00596		2.1062	0.60266
-0.1123	0.00596		2.1063	0.60273
-0.1122	0.00598		2.1064	0.60276
-0.1121	0.00598		2.1065	0.60283
-0.112	0.00598		2.1066	0.60286
-0.1119	0.00598		2.1067	0.60289
-0.1118	0.00598		2.1068	0.60296
-0.1117	0.00601		2.1069	0.60302
-0.1116	0.00601		2.107	0.60312
-0.1115	0.00601		2.1071	0.60322
-0.1114	0.00601		2.1072	0.60331
-0.1113	0.00601		2.1073	0.60341
-0.1112	0.00598		2.1074	0.60354
-0.1111	0.00598		2.1075	0.60367
-0.111	0.00596		2.1076	0.6038
-0.1109	0.00593		2.1077	0.60393
-0.1108	0.00593		2.1078	0.60406
-0.1107	0.0059		2.1079	0.60416
-0.1106	0.00588		2.108	0.60429
-0.1105	0.00585		2.1081	0.60442
-0.1104	0.00583		2.1082	0.60452
-0.1103	0.0058		2.1083	0.60458
-0.1102	0.0058		2.1084	0.60468
-0.1101	0.00578		2.1085	0.60471
-0.11	0.00578		2.1086	0.60474
-0.1099	0.00578		2.1087	0.60471
-0.1098	0.00578		2.1088	0.60468
-0.1097	0.00578		2.1089	0.60461
-0.1096	0.00578		2.109	0.60452
-0.1095	0.00578		2.1091	0.60442
-0.1094	0.0058		2.1092	0.60429
-0.1093	0.0058		2.1093	0.60413
-0.1092	0.0058		2.1094	0.604
-0.1091	0.00583		2.1095	0.60383
-0.109	0.00583		2.1096	0.60367
-0.1089	0.00583		2.1097	0.60348
-0.1088	0.00585		2.1098	0.60331
-0.1087	0.00585		2.1099	0.60315
-0.1086	0.00585		2.11	0.60296
-0.1085	0.00585		2.1101	0.60279
-0.1084	0.00585		2.1102	0.6026
-0.1083	0.00585		2.1103	0.60244
-0.1082	0.00585		2.1104	0.60224
-0.1081	0.00583		2.1105	0.60208
-0.108	0.0058		2.1106	0.60192
-0.1079	0.0058		2.1107	0.60179
-0.1078	0.00578		2.1108	0.60166
-0.1077	0.00575		2.1109	0.60156
-0.1076	0.00575		2.111	0.60146
-0.1075	0.00572		2.1111	0.60137
-0.1074	0.00572		2.1112	0.60127
-0.1073	0.00572		2.1113	0.60117
-0.1072	0.00572		2.1114	0.60107
-0.1071	0.00572		2.1115	0.60094
-0.107	0.00572		2.1116	0.60081
-0.1069	0.00575		2.1117	0.60065
-0.1068	0.00575		2.1118	0.60049
-0.1067	0.00575		2.1119	0.60033
-0.1066	0.00575		2.112	0.60013
-0.1065	0.00575		2.1121	0.59994
-0.1064	0.00575		2.1122	0.59974
-0.1063	0.00575		2.1123	0.59955
-0.1062	0.00572		2.1124	0.59932
-0.1061	0.00572		2.1125	0.59912
-0.106	0.00572		2.1126	0.5989
-0.1059	0.00572		2.1127	0.59867
-0.1058	0.00575		2.1128	0.59844
-0.1057	0.00575		2.1129	0.59821
-0.1056	0.00575		2.113	0.59802
-0.1055	0.00578		2.1131	0.59786
-0.1054	0.00578		2.1132	0.59773
-0.1053	0.0058		2.1133	0.59766
-0.1052	0.0058		2.1134	0.59763
-0.1051	0.0058		2.1135	0.59769
-0.105	0.0058		2.1136	0.59786
-0.1049	0.00583		2.1137	0.59808
-0.1048	0.00583		2.1138	0.59838
-0.1047	0.00583		2.1139	0.5987
-0.1046	0.00583		2.114	0.59912
-0.1045	0.00583		2.1141	0.59955
-0.1044	0.00585		2.1142	0.6
-0.1043	0.00585		2.1143	0.60046
-0.1042	0.00585		2.1144	0.60091
-0.1041	0.00588		2.1145	0.60133
-0.104	0.0059		2.1146	0.60172
-0.1039	0.0059		2.1147	0.60211
-0.1038	0.00593		2.1148	0.60244
-0.1037	0.00593		2.1149	0.60273
-0.1036	0.00596		2.115	0.60299
-0.1035	0.00598		2.1151	0.60318
-0.1034	0.00598		2.1152	0.60341
-0.1033	0.00598		2.1153	0.60357
-0.1032	0.00601		2.1154	0.6037
-0.1031	0.00601		2.1155	0.60383
-0.103	0.00601		2.1156	0.60393
-0.1029	0.00598		2.1157	0.60396
-0.1028	0.00598		2.1158	0.604
-0.1027	0.00596		2.1159	0.604
-0.1026	0.00593		2.116	0.60393
-0.1025	0.00593		2.1161	0.60387
-0.1024	0.0059		2.1162	0.60377
-0.1023	0.00588		2.1163	0.60364
-0.1022	0.00585		2.1164	0.60354
-0.1021	0.00585		2.1165	0.60341
-0.102	0.00583		2.1166	0.60331
-0.1019	0.00583		2.1167	0.60322
-0.1018	0.0058		2.1168	0.60315
-0.1017	0.0058		2.1169	0.60312
-0.1016	0.0058		2.117	0.60312
-0.1015	0.00583		2.1171	0.60312
-0.1014	0.00583		2.1172	0.60315
-0.1013	0.00583		2.1173	0.60318
-0.1012	0.00585		2.1174	0.60318
-0.1011	0.00585		2.1175	0.60322
-0.101	0.00588		2.1176	0.60318
-0.1009	0.00588		2.1177	0.60312
-0.1008	0.00588		2.1178	0.60302
-0.1007	0.00588		2.1179	0.60289
-0.1006	0.00588		2.118	0.60273
-0.1005	0.00588		2.1181	0.60253
-0.1004	0.00588		2.1182	0.60231
-0.1003	0.00588		2.1183	0.60205
-0.1002	0.00588		2.1184	0.60176
-0.1001	0.00588		2.1185	0.6015
-0.1	0.00588		2.1186	0.6012
-0.0999	0.00588		2.1187	0.60091
-0.0998	0.00588		2.1188	0.60062
-0.0997	0.00588		2.1189	0.60033
-0.0996	0.00588		2.119	0.60007
-0.0995	0.00588		2.1191	0.59981
-0.0994	0.00588		2.1192	0.59955
-0.0993	0.00585		2.1193	0.59932
-0.0992	0.00585		2.1194	0.59909
-0.0991	0.00585		2.1195	0.59893
-0.099	0.00585		2.1196	0.59877
-0.0989	0.00585		2.1197	0.59867
-0.0988	0.00583		2.1198	0.5986
-0.0987	0.00583		2.1199	0.5986
-0.0986	0.00583		2.12	0.5986
-0.0985	0.00583		2.1201	0.59867
-0.0984	0.0058		2.1202	0.5988
-0.0983	0.0058		2.1203	0.59893
-0.0982	0.0058		2.1204	0.59909
-0.0981	0.0058		2.1205	0.59929
-0.098	0.0058		2.1206	0.59948
-0.0979	0.00583		2.1207	0.59968
-0.0978	0.00583		2.1208	0.59987
-0.0977	0.00585		2.1209	0.60007
-0.0976	0.00588		2.121	0.60026
-0.0975	0.0059		2.1211	0.60046
-0.0974	0.00593		2.1212	0.60062
-0.0973	0.00596		2.1213	0.60078
-0.0972	0.00598		2.1214	0.60094
-0.0971	0.00598		2.1215	0.60107
-0.097	0.00601		2.1216	0.60117
-0.0969	0.00601		2.1217	0.60127
-0.0968	0.00598		2.1218	0.6013
-0.0967	0.00598		2.1219	0.60133
-0.0966	0.00596		2.122	0.60133
-0.0965	0.00593		2.1221	0.60133
-0.0964	0.00593		2.1222	0.60127
-0.0963	0.0059		2.1223	0.6012
-0.0962	0.0059		2.1224	0.60114
-0.0961	0.0059		2.1225	0.60107
-0.096	0.0059		2.1226	0.60101
-0.0959	0.00593		2.1227	0.60094
-0.0958	0.00593		2.1228	0.60094
-0.0957	0.00596		2.1229	0.60098
-0.0956	0.00598		2.123	0.60104
-0.0955	0.00601		2.1231	0.60114
-0.0954	0.00603		2.1232	0.6013
-0.0953	0.00606		2.1233	0.60146
-0.0952	0.00606		2.1234	0.60169
-0.0951	0.00609		2.1235	0.60195
-0.095	0.00609		2.1236	0.60221
-0.0949	0.00609		2.1237	0.6025
-0.0948	0.00609		2.1238	0.60276
-0.0947	0.00609		2.1239	0.60305
-0.0946	0.00606		2.124	0.60331
-0.0945	0.00606		2.1241	0.60354
-0.0944	0.00606		2.1242	0.60374
-0.0943	0.00606		2.1243	0.60393
-0.0942	0.00606		2.1244	0.60406
-0.0941	0.00606		2.1245	0.60419
-0.094	0.00606		2.1246	0.60426
-0.0939	0.00603		2.1247	0.60432
-0.0938	0.00603		2.1248	0.60432
-0.0937	0.00603		2.1249	0.60432
-0.0936	0.00601		2.125	0.60429
-0.0935	0.00598		2.1251	0.60422
-0.0934	0.00596		2.1252	0.60416
-0.0933	0.00593		2.1253	0.60406
-0.0932	0.00593		2.1254	0.60396
-0.0931	0.0059		2.1255	0.60387
-0.093	0.00588		2.1256	0.60377
-0.0929	0.00585		2.1257	0.60364
-0.0928	0.00585		2.1258	0.60351
-0.0927	0.00583		2.1259	0.60341
-0.0926	0.00583		2.126	0.60328
-0.0925	0.00583		2.1261	0.60318
-0.0924	0.00583		2.1262	0.60309
-0.0923	0.0058		2.1263	0.60302
-0.0922	0.0058		2.1264	0.60299
-0.0921	0.0058		2.1265	0.60296
-0.092	0.0058		2.1266	0.60292
-0.0919	0.0058		2.1267	0.60292
-0.0918	0.00578		2.1268	0.60292
-0.0917	0.00578		2.1269	0.60296
-0.0916	0.00578		2.127	0.60296
-0.0915	0.00578		2.1271	0.60299
-0.0914	0.00575		2.1272	0.60299
-0.0913	0.00575		2.1273	0.60296
-0.0912	0.00575		2.1274	0.60296
-0.0911	0.00575		2.1275	0.60289
-0.091	0.00575		2.1276	0.60283
-0.0909	0.00575		2.1277	0.60276
-0.0908	0.00578		2.1278	0.6027
-0.0907	0.00578		2.1279	0.6026
-0.0906	0.0058		2.128	0.60253
-0.0905	0.0058		2.1281	0.60244
-0.0904	0.00583		2.1282	0.60237
-0.0903	0.00585		2.1283	0.60231
-0.0902	0.00588		2.1284	0.60227
-0.0901	0.0059		2.1285	0.60224
-0.09	0.00593		2.1286	0.60221
-0.0899	0.00596		2.1287	0.60218
-0.0898	0.00596		2.1288	0.60218
-0.0897	0.00598		2.1289	0.60218
-0.0896	0.00601		2.129	0.60218
-0.0895	0.00603		2.1291	0.60221
-0.0894	0.00603		2.1292	0.60221
-0.0893	0.00606		2.1293	0.60221
-0.0892	0.00606		2.1294	0.60221
-0.0891	0.00606		2.1295	0.60221
-0.089	0.00609		2.1296	0.60221
-0.0889	0.00609		2.1297	0.60218
-0.0888	0.00609		2.1298	0.60214
-0.0887	0.00609		2.1299	0.60211
-0.0886	0.00609		2.13	0.60208
-0.0885	0.00609		2.1301	0.60205
-0.0884	0.00609		2.1302	0.60205
-0.0883	0.00609		2.1303	0.60201
-0.0882	0.00609		2.1304	0.60201
-0.0881	0.00609		2.1305	0.60201
-0.088	0.00609		2.1306	0.60201
-0.0879	0.00609		2.1307	0.60208
-0.0878	0.00611		2.1308	0.60214
-0.0877	0.00611		2.1309	0.60221
-0.0876	0.00611		2.131	0.60231
-0.0875	0.00611		2.1311	0.6024
-0.0874	0.00611		2.1312	0.6025
-0.0873	0.00611		2.1313	0.6026
-0.0872	0.00609		2.1314	0.60266
-0.0871	0.00609		2.1315	0.6027
-0.087	0.00606		2.1316	0.60273
-0.0869	0.00606		2.1317	0.6027
-0.0868	0.00603		2.1318	0.60266
-0.0867	0.00603		2.1319	0.6026
-0.0866	0.00601		2.132	0.60253
-0.0865	0.00601		2.1321	0.60244
-0.0864	0.00603		2.1322	0.60234
-0.0863	0.00603		2.1323	0.60224
-0.0862	0.00606		2.1324	0.60214
-0.0861	0.00609		2.1325	0.60208
-0.086	0.00611		2.1326	0.60201
-0.0859	0.00614		2.1327	0.60195
-0.0858	0.00614		2.1328	0.60192
-0.0857	0.00616		2.1329	0.60188
-0.0856	0.00616		2.133	0.60188
-0.0855	0.00616		2.1331	0.60185
-0.0854	0.00616		2.1332	0.60182
-0.0853	0.00616		2.1333	0.60179
-0.0852	0.00614		2.1334	0.60172
-0.0851	0.00611		2.1335	0.60163
-0.085	0.00609		2.1336	0.60153
-0.0849	0.00606		2.1337	0.60143
-0.0848	0.00603		2.1338	0.60127
-0.0847	0.00601		2.1339	0.60114
-0.0846	0.00598		2.134	0.60094
-0.0845	0.00596		2.1341	0.60078
-0.0844	0.00593		2.1342	0.60055
-0.0843	0.00593		2.1343	0.60036
-0.0842	0.0059		2.1344	0.60016
-0.0841	0.0059		2.1345	0.59994
-0.084	0.0059		2.1346	0.59974
-0.0839	0.0059		2.1347	0.59951
-0.0838	0.0059		2.1348	0.59932
-0.0837	0.0059		2.1349	0.59912
-0.0836	0.00593		2.135	0.59896
-0.0835	0.00593		2.1351	0.5988
-0.0834	0.00596		2.1352	0.59864
-0.0833	0.00596		2.1353	0.59851
-0.0832	0.00598		2.1354	0.59841
-0.0831	0.00598		2.1355	0.59828
-0.083	0.00601		2.1356	0.59821
-0.0829	0.00601		2.1357	0.59812
-0.0828	0.00603		2.1358	0.59802
-0.0827	0.00603		2.1359	0.59795
-0.0826	0.00603		2.136	0.59786
-0.0825	0.00603		2.1361	0.59776
-0.0824	0.00603		2.1362	0.59769
-0.0823	0.00601		2.1363	0.59763
-0.0822	0.00601		2.1364	0.59756
-0.0821	0.00598		2.1365	0.5975
-0.082	0.00598		2.1366	0.59747
-0.0819	0.00598		2.1367	0.59747
-0.0818	0.00596		2.1368	0.5975
-0.0817	0.00596		2.1369	0.59756
-0.0816	0.00596		2.137	0.59766
-0.0815	0.00596		2.1371	0.59776
-0.0814	0.00598		2.1372	0.59792
-0.0813	0.00598		2.1373	0.59812
-0.0812	0.00598		2.1374	0.59831
-0.0811	0.00601		2.1375	0.59854
-0.081	0.00601		2.1376	0.5988
-0.0809	0.00601		2.1377	0.59906
-0.0808	0.00601		2.1378	0.59932
-0.0807	0.00601		2.1379	0.59958
-0.0806	0.00601		2.138	0.59984
-0.0805	0.00601		2.1381	0.6001
-0.0804	0.00601		2.1382	0.60036
-0.0803	0.00601		2.1383	0.60059
-0.0802	0.00598		2.1384	0.60078
-0.0801	0.00598		2.1385	0.60098
-0.08	0.00598		2.1386	0.60114
-0.0799	0.00596		2.1387	0.6013
-0.0798	0.00596		2.1388	0.60143
-0.0797	0.00596		2.1389	0.60153
-0.0796	0.00596		2.139	0.60163
-0.0795	0.00596		2.1391	0.60172
-0.0794	0.00596		2.1392	0.60182
-0.0793	0.00596		2.1393	0.60188
-0.0792	0.00596		2.1394	0.60195
-0.0791	0.00596		2.1395	0.60201
-0.079	0.00596		2.1396	0.60208
-0.0789	0.00598		2.1397	0.60211
-0.0788	0.00598		2.1398	0.60214
-0.0787	0.00598		2.1399	0.60214
-0.0786	0.00598		2.14	0.60211
-0.0785	0.00601		2.1401	0.60208
-0.0784	0.00601		2.1402	0.60201
-0.0783	0.00601		2.1403	0.60192
-0.0782	0.00601		2.1404	0.60182
-0.0781	0.00601		2.1405	0.60172
-0.078	0.00601		2.1406	0.60159
-0.0779	0.00601		2.1407	0.60146
-0.0778	0.00601		2.1408	0.60137
-0.0777	0.00601		2.1409	0.60124
-0.0776	0.00601		2.141	0.60114
-0.0775	0.00601		2.1411	0.60104
-0.0774	0.00598		2.1412	0.60098
-0.0773	0.00598		2.1413	0.60094
-0.0772	0.00598		2.1414	0.60091
-0.0771	0.00598		2.1415	0.60091
-0.077	0.00598		2.1416	0.60091
-0.0769	0.00596		2.1417	0.60098
-0.0768	0.00596		2.1418	0.60104
-0.0767	0.00596		2.1419	0.60114
-0.0766	0.00593		2.142	0.60127
-0.0765	0.00593		2.1421	0.60143
-0.0764	0.0059		2.1422	0.60159
-0.0763	0.0059		2.1423	0.60179
-0.0762	0.00588		2.1424	0.60198
-0.0761	0.00588		2.1425	0.60214
-0.076	0.00585		2.1426	0.60231
-0.0759	0.00583		2.1427	0.60244
-0.0758	0.00583		2.1428	0.60253
-0.0757	0.0058		2.1429	0.60257
-0.0756	0.0058		2.143	0.6026
-0.0755	0.00578		2.1431	0.60253
-0.0754	0.00578		2.1432	0.60247
-0.0753	0.00578		2.1433	0.60237
-0.0752	0.00578		2.1434	0.60224
-0.0751	0.0058		2.1435	0.60211
-0.075	0.00583		2.1436	0.60198
-0.0749	0.00583		2.1437	0.60188
-0.0748	0.00585		2.1438	0.60182
-0.0747	0.00588		2.1439	0.60176
-0.0746	0.0059		2.144	0.60176
-0.0745	0.0059		2.1441	0.60176
-0.0744	0.00593		2.1442	0.60179
-0.0743	0.00593		2.1443	0.60185
-0.0742	0.00593		2.1444	0.60195
-0.0741	0.00593		2.1445	0.60201
-0.074	0.00593		2.1446	0.60211
-0.0739	0.00593		2.1447	0.60218
-0.0738	0.00593		2.1448	0.60227
-0.0737	0.00593		2.1449	0.60237
-0.0736	0.0059		2.145	0.60247
-0.0735	0.0059		2.1451	0.6026
-0.0734	0.0059		2.1452	0.60273
-0.0733	0.00588		2.1453	0.60292
-0.0732	0.00588		2.1454	0.60309
-0.0731	0.00588		2.1455	0.60331
-0.073	0.00585		2.1456	0.60357
-0.0729	0.00585		2.1457	0.60383
-0.0728	0.00583		2.1458	0.60409
-0.0727	0.00583		2.1459	0.60439
-0.0726	0.00583		2.146	0.60468
-0.0725	0.0058		2.1461	0.60497
-0.0724	0.0058		2.1462	0.60523
-0.0723	0.00583		2.1463	0.60546
-0.0722	0.00583		2.1464	0.60569
-0.0721	0.00585		2.1465	0.60588
-0.072	0.00588		2.1466	0.60604
-0.0719	0.0059		2.1467	0.60621
-0.0718	0.00593		2.1468	0.6063
-0.0717	0.00596		2.1469	0.60637
-0.0716	0.00601		2.147	0.60637
-0.0715	0.00603		2.1471	0.60637
-0.0714	0.00606		2.1472	0.6063
-0.0713	0.00606		2.1473	0.60624
-0.0712	0.00609		2.1474	0.60611
-0.0711	0.00609		2.1475	0.60595
-0.071	0.00609		2.1476	0.60572
-0.0709	0.00609		2.1477	0.60549
-0.0708	0.00609		2.1478	0.60526
-0.0707	0.00609		2.1479	0.605
-0.0706	0.00606		2.148	0.60474
-0.0705	0.00606		2.1481	0.60448
-0.0704	0.00606		2.1482	0.60426
-0.0703	0.00606		2.1483	0.60403
-0.0702	0.00603		2.1484	0.60383
-0.0701	0.00603		2.1485	0.60364
-0.07	0.00603		2.1486	0.60348
-0.0699	0.00601		2.1487	0.60331
-0.0698	0.00601		2.1488	0.60315
-0.0697	0.00598		2.1489	0.60299
-0.0696	0.00598		2.149	0.60279
-0.0695	0.00596		2.1491	0.60263
-0.0694	0.00596		2.1492	0.6024
-0.0693	0.00596		2.1493	0.60221
-0.0692	0.00593		2.1494	0.60198
-0.0691	0.00593		2.1495	0.60176
-0.069	0.00593		2.1496	0.60153
-0.0689	0.00596		2.1497	0.6013
-0.0688	0.00596		2.1498	0.60111
-0.0687	0.00596		2.1499	0.60094
-0.0686	0.00598		2.15	0.60081
-0.0685	0.00598		2.1501	0.60068
-0.0684	0.00601		2.1502	0.60062
-0.0683	0.00601		2.1503	0.60055
-0.0682	0.00601		2.1504	0.60052
-0.0681	0.00601		2.1505	0.60049
-0.068	0.00598		2.1506	0.60046
-0.0679	0.00598		2.1507	0.60046
-0.0678	0.00596		2.1508	0.60042
-0.0677	0.00593		2.1509	0.60039
-0.0676	0.00593		2.151	0.60036
-0.0675	0.0059		2.1511	0.60029
-0.0674	0.00588		2.1512	0.60023
-0.0673	0.00588		2.1513	0.60016
-0.0672	0.00588		2.1514	0.60013
-0.0671	0.00588		2.1515	0.6001
-0.067	0.00588		2.1516	0.60007
-0.0669	0.00588		2.1517	0.60007
-0.0668	0.00588		2.1518	0.6001
-0.0667	0.00588		2.1519	0.60016
-0.0666	0.0059		2.152	0.60026
-0.0665	0.0059		2.1521	0.60039
-0.0664	0.0059		2.1522	0.60052
-0.0663	0.0059		2.1523	0.60068
-0.0662	0.0059		2.1524	0.60088
-0.0661	0.0059		2.1525	0.60111
-0.066	0.0059		2.1526	0.6013
-0.0659	0.0059		2.1527	0.60153
-0.0658	0.0059		2.1528	0.60176
-0.0657	0.0059		2.1529	0.60195
-0.0656	0.0059		2.153	0.60214
-0.0655	0.0059		2.1531	0.60231
-0.0654	0.0059		2.1532	0.60244
-0.0653	0.0059		2.1533	0.60257
-0.0652	0.0059		2.1534	0.60263
-0.0651	0.0059		2.1535	0.6027
-0.065	0.0059		2.1536	0.60273
-0.0649	0.0059		2.1537	0.60276
-0.0648	0.0059		2.1538	0.60279
-0.0647	0.00593		2.1539	0.60279
-0.0646	0.00593		2.154	0.60283
-0.0645	0.00593		2.1541	0.60286
-0.0644	0.00596		2.1542	0.60292
-0.0643	0.00596		2.1543	0.60302
-0.0642	0.00596		2.1544	0.60315
-0.0641	0.00596		2.1545	0.60335
-0.064	0.00596		2.1546	0.60354
-0.0639	0.00596		2.1547	0.6038
-0.0638	0.00596		2.1548	0.60409
-0.0637	0.00596		2.1549	0.60442
-0.0636	0.00593		2.155	0.60474
-0.0635	0.00593		2.1551	0.6051
-0.0634	0.00593		2.1552	0.60546
-0.0633	0.0059		2.1553	0.60578
-0.0632	0.0059		2.1554	0.60608
-0.0631	0.00588		2.1555	0.60634
-0.063	0.00588		2.1556	0.60653
-0.0629	0.00588		2.1557	0.60669
-0.0628	0.00588		2.1558	0.60679
-0.0627	0.00588		2.1559	0.60682
-0.0626	0.00588		2.156	0.60679
-0.0625	0.00588		2.1561	0.60673
-0.0624	0.00588		2.1562	0.60663
-0.0623	0.00588		2.1563	0.6065
-0.0622	0.0059		2.1564	0.60634
-0.0621	0.0059		2.1565	0.60617
-0.062	0.0059		2.1566	0.60601
-0.0619	0.00593		2.1567	0.60585
-0.0618	0.00593		2.1568	0.60565
-0.0617	0.00596		2.1569	0.60549
-0.0616	0.00596		2.157	0.6053
-0.0615	0.00596		2.1571	0.6051
-0.0614	0.00598		2.1572	0.60487
-0.0613	0.00598		2.1573	0.60465
-0.0612	0.00598		2.1574	0.60439
-0.0611	0.00598		2.1575	0.60413
-0.061	0.00601		2.1576	0.60383
-0.0609	0.00601		2.1577	0.60357
-0.0608	0.00601		2.1578	0.60328
-0.0607	0.00601		2.1579	0.60299
-0.0606	0.00603		2.158	0.60273
-0.0605	0.00603		2.1581	0.60247
-0.0604	0.00603		2.1582	0.60224
-0.0603	0.00603		2.1583	0.60205
-0.0602	0.00603		2.1584	0.60185
-0.0601	0.00601		2.1585	0.60169
-0.06	0.00601		2.1586	0.6015
-0.0599	0.00601		2.1587	0.60133
-0.0598	0.00598		2.1588	0.60114
-0.0597	0.00598		2.1589	0.60098
-0.0596	0.00596		2.159	0.60075
-0.0595	0.00596		2.1591	0.60052
-0.0594	0.00596		2.1592	0.60026
-0.0593	0.00596		2.1593	0.59997
-0.0592	0.00596		2.1594	0.59968
-0.0591	0.00596		2.1595	0.59938
-0.059	0.00598		2.1596	0.59906
-0.0589	0.00598		2.1597	0.59877
-0.0588	0.00598		2.1598	0.59844
-0.0587	0.00601		2.1599	0.59818
-0.0586	0.00601		2.16	0.59792
-0.0585	0.00601		2.1601	0.59769
-0.0584	0.00601		2.1602	0.5975
-0.0583	0.00598		2.1603	0.59734
-0.0582	0.00598		2.1604	0.59721
-0.0581	0.00596		2.1605	0.59708
-0.058	0.00593		2.1606	0.59695
-0.0579	0.00593		2.1607	0.59685
-0.0578	0.0059		2.1608	0.59675
-0.0577	0.0059		2.1609	0.59662
-0.0576	0.0059		2.161	0.59652
-0.0575	0.00593		2.1611	0.59643
-0.0574	0.00593		2.1612	0.5963
-0.0573	0.00596		2.1613	0.5962
-0.0572	0.00598		2.1614	0.5961
-0.0571	0.00601		2.1615	0.596
-0.057	0.00601		2.1616	0.59594
-0.0569	0.00603		2.1617	0.59591
-0.0568	0.00603		2.1618	0.59591
-0.0567	0.00603		2.1619	0.59591
-0.0566	0.00603		2.162	0.59597
-0.0565	0.00601		2.1621	0.59607
-0.0564	0.00601		2.1622	0.5962
-0.0563	0.00598		2.1623	0.59636
-0.0562	0.00596		2.1624	0.59652
-0.0561	0.00593		2.1625	0.59675
-0.056	0.0059		2.1626	0.59698
-0.0559	0.00588		2.1627	0.59721
-0.0558	0.00588		2.1628	0.59747
-0.0557	0.00585		2.1629	0.59773
-0.0556	0.00585		2.163	0.59799
-0.0555	0.00585		2.1631	0.59825
-0.0554	0.00585		2.1632	0.59851
-0.0553	0.00585		2.1633	0.59873
-0.0552	0.00588		2.1634	0.59896
-0.0551	0.00588		2.1635	0.59919
-0.055	0.00588		2.1636	0.59938
-0.0549	0.0059		2.1637	0.59958
-0.0548	0.0059		2.1638	0.59974
-0.0547	0.0059		2.1639	0.59994
-0.0546	0.00593		2.164	0.6001
-0.0545	0.00593		2.1641	0.60029
-0.0544	0.00596		2.1642	0.60049
-0.0543	0.00596		2.1643	0.60072
-0.0542	0.00598		2.1644	0.60094
-0.0541	0.00598		2.1645	0.60117
-0.054	0.00598		2.1646	0.60143
-0.0539	0.00601		2.1647	0.60172
-0.0538	0.00601		2.1648	0.60198
-0.0537	0.00601		2.1649	0.60227
-0.0536	0.00603		2.165	0.60257
-0.0535	0.00603		2.1651	0.60283
-0.0534	0.00603		2.1652	0.60309
-0.0533	0.00603		2.1653	0.60335
-0.0532	0.00603		2.1654	0.60357
-0.0531	0.00606		2.1655	0.6038
-0.053	0.00606		2.1656	0.604
-0.0529	0.00606		2.1657	0.60416
-0.0528	0.00606		2.1658	0.60432
-0.0527	0.00606		2.1659	0.60448
-0.0526	0.00609		2.166	0.60461
-0.0525	0.00609		2.1661	0.60474
-0.0524	0.00606		2.1662	0.60484
-0.0523	0.00606		2.1663	0.60494
-0.0522	0.00606		2.1664	0.605
-0.0521	0.00603		2.1665	0.60507
-0.052	0.00603		2.1666	0.60513
-0.0519	0.00601		2.1667	0.60517
-0.0518	0.00598		2.1668	0.6052
-0.0517	0.00596		2.1669	0.60523
-0.0516	0.00596		2.167	0.60523
-0.0515	0.00593		2.1671	0.60523
-0.0514	0.0059		2.1672	0.60523
-0.0513	0.0059		2.1673	0.60523
-0.0512	0.00588		2.1674	0.60523
-0.0511	0.00588		2.1675	0.6052
-0.051	0.00585		2.1676	0.6052
-0.0509	0.00585		2.1677	0.60517
-0.0508	0.00585		2.1678	0.60517
-0.0507	0.00585		2.1679	0.60513
-0.0506	0.00585		2.168	0.6051
-0.0505	0.00585		2.1681	0.60507
-0.0504	0.00588		2.1682	0.60504
-0.0503	0.00588		2.1683	0.605
-0.0502	0.00588		2.1684	0.60494
-0.0501	0.0059		2.1685	0.60487
-0.05	0.0059		2.1686	0.60481
-0.0499	0.00593		2.1687	0.60468
-0.0498	0.00593		2.1688	0.60455
-0.0497	0.00596		2.1689	0.60439
-0.0496	0.00596		2.169	0.60419
-0.0495	0.00598		2.1691	0.60396
-0.0494	0.00598		2.1692	0.60374
-0.0493	0.00598		2.1693	0.60348
-0.0492	0.00601		2.1694	0.60322
-0.0491	0.00601		2.1695	0.60296
-0.049	0.00601		2.1696	0.60266
-0.0489	0.00601		2.1697	0.6024
-0.0488	0.00598		2.1698	0.60218
[truncated: 97,993 more rows]

## Sheet: Figure S4
Figure S4
Photon energy (eV)	Power
0.7563	11.329
0.7687	12.2695
0.7811	12.6796
0.7935	13.6712
0.8059	13.7588
0.8183	13.9785
0.8307	15.0369
0.8431	15.2463
0.8555	15.0425
0.8679	15.967
0.8803	13.4202
0.8927	15.2597
0.9051	13.7914
0.9175	16.1602
0.9299	18.4947
0.9423	18.8767
0.9547	19.1465
0.9671	19.7165
0.9795	20.4827
0.9919	20.8344
1.0043	21.5276
1.0167	22.074
1.0291	22.4068
1.0415	23.3949
1.0539	23.8169
1.0663	24.3326
1.0787	24.5942
1.0911	24.7935
1.1035	24.8706
1.1159	25.3085
1.1283	25.9799
1.1407	26.3101
1.1531	26.8365
1.1655	30.7666
1.1778	27.2265
1.1902	26.6097
1.2026	27.2737
1.215	26.3367
1.2274	26.6317
1.2398	27.1419
1.2522	27.0993
1.2646	26.2799
1.277	25.8643
1.2894	25.6327
1.3018	25.8188
1.3142	25.2593
1.3266	24.9983
1.339	24.664
1.3514	24.7859
1.3638	23.8161
1.3762	23.3295
1.3886	22.8418
1.401	21.9225
1.4134	21.2485
1.4258	21.3483
1.4382	19.6732
1.4506	19.406
1.463	19.2503
1.4754	18.841
1.4878	18.1063
1.5002	17.3729
1.5126	16.585
1.525	16.0693
1.5374	15.3976
1.5498	14.9784
1.5622	14.7099
1.5746	14.0792
1.587	14.0428
1.5994	13.4057
1.6118	13.2415
1.6242	12.115
1.6366	11.9354
1.649	11.3077
1.6614	11.0568
1.6738	10.9803
1.6862	10.3262
1.6986	10.2297
1.711	9.8367
1.7234	8.168
1.7358	8.0626
1.7482	5.6409
1.7606	6.4218
1.773	6.2848
1.7854	7.2028
1.7978	7.3006
1.8102	8.1289
1.8226	8.3994
1.835	8.3347
1.8474	9.5275
1.8598	9.8129
1.8722	10.2459
1.8846	10.9051
1.897	11.2725
1.9094	11.8155
1.9218	12.3102
1.9342	12.5762
1.9466	14.4879
1.959	14.5932
1.9713	15.2661
1.9837	15.4074
1.9961	16.4722
2.0085	17.093
2.0209	16.7325
2.0333	18.5356
2.0457	19.0313
2.0581	18.4608
2.0705	19.5009
2.0829	20.3152
2.0953	20.7972
2.1077	20.8593
2.1201	20.9996
2.1325	22.213
2.1449	22.7472
2.1573	23.0758
2.1697	23.9728
2.1821	23.9492
2.1945	24.195
2.2069	25.2402
2.2193	26.0328
2.2317	26.0728
2.2441	26.2542
2.2565	27.0211
2.2689	27.1342
2.2813	27.0193
2.2937	28.2584
2.3061	28.1308
2.3185	27.6615
2.3309	28.9639
2.3433	31.8204
2.3557	32.5068
2.3681	30.5132
2.3805	32.1745
2.3929	33.064
2.4053	33.4433
2.4177	33.9313
2.4301	34.6933
2.4425	35.2058
2.4549	35.9574
2.4673	36.7308
2.4797	36.5468
2.4921	35.9471
2.5045	36.0398
2.5169	36.959
2.5293	36.8472
2.5417	37.2772
2.5541	36.7014
2.5665	38.2025
2.5789	38.6667
2.5913	39.8815
2.6037	40.7504
2.6161	41.162
2.6285	41.709
2.6409	43.267
2.6533	42.6705
2.6657	44.5877
2.6781	44.4704
2.6905	44.6318
2.7029	44.6362
2.7153	46.0151
2.7277	46.6063
2.7401	44.9332
2.7524	45.1581
2.7648	44.854
2.7772	45.2273
2.7896	44.6491
2.802	44.2686
2.8144	43.8276
2.8268	45.0619
2.8392	46.2976
2.8516	45.4228
2.864	47.4473
2.8764	48.3506
2.8888	49.4189
2.9012	52.2871
2.9136	54.4817
2.926	55.3689
2.9384	54.8866
2.9508	55.707
2.9632	52.7239
2.9756	55.6688
2.988	66.0163
3.0004	61.7039
3.0128	61.0293
3.0376	3.1404
3.05	3.2161
3.0624	3.1861
3.0748	3.1619
3.0872	3.4209
3.0996	3.2715
3.112	3.3669
3.1244	3.5298
3.1368	3.4099
3.1492	3.5693
3.1616	3.4144
3.174	3.4739
3.1864	3.5
3.1988	3.647
3.2112	3.4573
3.2236	3.4585
3.236	3.4937
3.2484	3.393
3.2608	3.4769
3.2732	3.4483
3.2856	3.2482
3.298	3.2456
3.3104	3.285
3.3228	3.1026
3.3352	3.1101
3.3476	3.1503
3.36	3.064
3.3724	3.054
3.3848	2.9465
3.3972	2.8947
3.4096	2.8099
3.422	3.0306
3.4344	2.6387
3.4468	2.5084
3.4592	2.5439
3.4716	2.3901
3.484	2.4403
3.4964	2.1787
3.5088	2.6425
3.5212	2.6885
3.5335	2.7383
3.5459	2.6428
3.5583	2.9896
3.5707	3.189
3.5831	3.0398
3.5955	2.8827
3.6079	2.8523
3.6203	3.0233
3.6327	3.2746
3.6451	3.1228
3.6575	3.2457
3.6699	3.1306
3.6823	3.6029
3.6947	3.648
3.7071	3.4551
3.7195	3.6252
3.7319	3.8642
3.7443	3.8191
3.7567	3.6489
3.7691	3.6783
3.7815	4.1846
3.7939	4.2408
3.8063	4.2817
3.8187	4.5966
3.8311	4.3475
3.8435	4.7153
3.8559	4.5771
3.8683	5.1537
3.8807	5.2224
3.8931	4.6071
3.9055	4.8773
3.9179	5.1025
3.9303	5.0391
3.9427	4.5672
3.9551	4.3406
3.9675	4.9956
3.9799	4.6172
3.9923	4.4333
4.0047	4.85
4.0171	4.8119
4.0295	4.96
4.0419	5.1671
4.0543	5.8072
4.0667	5.7127
4.0791	5.382
4.0915	6.3526
4.1039	6.7547
4.1163	6.5614
4.1287	5.8959
4.1411	5.7476
4.1535	5.6201
4.1659	4.8794
4.1783	4.8376
4.1907	5.005
4.2031	5.1148
4.2155	4.9008
4.2279	5.2982
4.2403	5.5097
4.2527	5.0318
4.2651	5.1729
4.2775	5.329
4.2899	5.3686
4.3023	5.3301
4.3147	5.7541
4.327	5.6853
4.3394	6.0273
4.3518	6.7063
4.3642	5.7496
4.3766	5.7109
4.389	6.2338
4.4014	5.774
4.4138	5.7189
4.4262	5.7909
4.4386	5.6655
4.451	5.5406
4.4634	5.5996
4.4758	5.4831
4.4882	4.6561
4.5006	4.7059
4.513	5.2338
4.5254	5.2087
4.5378	5.2106
4.5502	5.6859
4.5626	5.2909
4.575	5.2822
4.5874	5.2847
4.5998	4.9647
4.6122	4.6302
4.6246	4.5826
4.637	4.3493
4.6494	4.0887
4.6618	3.9001
4.6742	4.3159
4.6866	4.3238
4.699	4.2148
4.7114	4.8313
4.7238	4.9352
4.7362	4.5754
4.7486	4.2962
4.761	4.5845
4.7734	4.5135
4.7858	4.1574
4.7982	4.4217
4.8106	4.1093
4.823	3.8135
4.8354	3.6739
4.8478	3.2677
4.8602	3.4609
4.8726	3.0088
4.885	2.9713
4.8974	3.1941
4.9098	3.1838
4.9222	2.9792
4.9346	3.109
4.947	4.2385
4.9594	4.018
4.9718	3.1804
4.9842	2.922
4.9966	2.8601
5.009	3.4846
5.0214	3.628
5.0338	3.4279
5.0462	3.4409
5.0586	3.182
5.071	3.4681
5.0834	3.2821
5.0958	3.3457
5.1081	3.3238
5.1205	2.8822
5.1329	2.7002
5.1453	2.7732
5.1577	2.9601
5.1701	2.857
5.1825	3.0525
5.1949	2.95
5.2073	3.0308
5.2197	2.9016
5.2321	2.6007
5.2445	2.529
5.2569	2.577
5.2693	2.7996
5.2817	2.5836
5.2941	2.521
5.3065	2.2184
5.3189	2.0688
5.3313	1.9596
5.3437	1.7137
5.3561	1.6554
5.3685	1.6272
5.3809	1.6016
5.3933	1.6871
5.4057	1.6503
5.4181	1.6354
5.4305	1.3628
5.4429	1.4046
5.4553	1.3659
5.4677	1.2839
5.4801	1.2168
5.4925	1.1666
5.5049	0.9809
5.5173	0.9418
5.5297	0.9039
5.5421	0.8415
5.5545	0.8768
5.5669	0.8792
5.5793	0.7856
5.5917	0.7251
5.6041	0.5434
5.6165	0.567
5.6289	0.5655
5.6413	0.5379
5.6537	0.5591
5.6661	0.4575
5.6785	0.4477
5.6909	0.4607
5.7033	0.4263
5.7157	0.2902
5.7281	0.315
5.7405	0.2763
5.7529	0.3887
